# Supplementary material for: Palladium catalyzed tandem cyclization of acryloylbenzamides and N-arylacrylamides with epoxides: access to functionalized isoquinolinediones and oxindoles
Source: Royal Society of Chemistry journal article supplement (doi:10.1039/d3qo01243c), 2023-01-01

*Supporting Information*

---

***Supporting Information***

**Palladium catalyzed tandem cyclization of acryloylbenzamides and  
N-arylacrylamides with epoxides: Access to functionalized  
isoquinolinediones and oxindoles**

Xiao-Yu Lu,\* Fu-Yi Shui, Xiang Zhang, Rui Huang, Zi-Zhen Wang, Yi-Wei Song,  
Fan Jiang, Gui-Xian Yang and Yan-Xi Sun

E-mail: xiaoyulu@mail.ustc.edu.cn

School of Materials and Chemical Engineering, ChuZhou University, Chu Zhou,  
239000, China.

**Table of Contents**

|                                                                                  |           |
|----------------------------------------------------------------------------------|-----------|
| <b>I. General Information .....</b>                                              | <b>S2</b> |
| <b>a. Materials .....</b>                                                        | <b>S2</b> |
| <b>b. Analytical Methods .....</b>                                               | <b>S2</b> |
| <b>II. General Experimental Procedures .....</b>                                 | <b>S3</b> |
| <b>a. Optimization of the reaction conditions .....</b>                          | <b>S3</b> |
| <b>b. Experimental Procedures for Examples Described (General Procedure)....</b> | <b>S4</b> |
| <b>III. Proposed Reaction Mechanism .....</b>                                    | <b>S5</b> |
| <b>IV. Substrate Scope, Spectral Data and NMR Spectra .....</b>                  | <b>S6</b> |

## I. General Information

### a. Materials

All the reactions were carried out in oven-dried schlenk tubes under argon atmosphere (purity  $\geq 99.999\%$ ). Pd(PPh<sub>3</sub>)<sub>4</sub> (CAS: 14221-01-3), PdCl<sub>2</sub>(PPh<sub>3</sub>)<sub>2</sub> (CAS: 13965-03-2), dppf (CAS: 548-26-5), xantphos (CAS: 161265-03-8), dpephos (CAS: 166330-10-5), BINAP (CAS: 98327-87-8), dppbz (CAS: 13991-08-7), dppm (CAS: 2071-20-7), dppe (CAS: 1663-45-2), dppp (CAS: 6737-42-4), dppb (CAS: 7688-25-7), 1,5-bis(diphenylphosphino)pentane (CAS: 27721-02-4), 1,1-bis(diisopropylphosphino)ferrocene (CAS: 97239-80-0), 1,1-Bis(di-tert-butylphosphino)ferrocene (CAS: 84680-95-5) and isobutylene oxide (CAS: 558-30-5) were purchased from Adamas. The following chemicals were purchased and used as received: PhCF<sub>3</sub> (Adamas), THF (Adamas) and 1,4-dioxane (Adamas) were stored over 4 Å molecular sieves under an argon atmosphere in a septum-capped bottle. All the other reagents and solvents mentioned in this text were purchased from commercial sources and used without purification.

### b. Analytical Methods

<sup>1</sup>H NMR, <sup>13</sup>C NMR, and <sup>19</sup>F NMR spectra were recorded on a Bruker Avance 400 spectrometer at ambient temperature in Chloroform-*d* unless otherwise noted; Data for <sup>1</sup>H-NMR are reported as follows: chemical shift ( $\delta$  ppm), multiplicity, integration, and coupling constant (Hz). Data for <sup>13</sup>C NMR are reported in terms of chemical shift ( $\delta$  ppm), multiplicity, and coupling constant (Hz). Gas chromatographic (GC) analysis was acquired on a Shimadzu GC-2014 Series GC System equipped with a flame-ionization detector. GC-MS analysis was performed on Thermo Scientific AS 3000 Series GC-MS System. HRMS analysis was performed on Finnigan LCQ advantage Max Series MS System. HPLC analysis was performed on Waters-Breeze (2487 Dual Absorbance Detector and 1525 Binary HPLC Pump). Chiralpak IC, AD, AS, KM columns were purchased from Daicel Chemical Industries, LTD. Organic solutions were concentrated under reduced pressure on a Buchi rotary evaporator. Flash column chromatographic purification of products was accomplished using forced-flow chromatography on Silica Gel (200-300 mesh). The mass analyzer type of the HRMS measurements was "LTQ Orbitrap" .

## II. General Experimental Procedures

## a. Optimization of the reaction conditions

Table S1

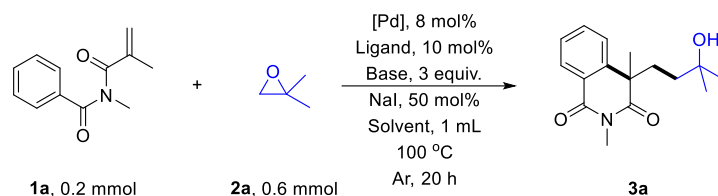

| Entry           | Catalyst                                           | Ligand      | Base                            | Solvent                 | Yield% <sup>c</sup> |
|-----------------|----------------------------------------------------|-------------|---------------------------------|-------------------------|---------------------|
| 1 <sup>a</sup>  | PdCl <sub>2</sub> (PPh <sub>3</sub> ) <sub>4</sub> | dppf        | Cy <sub>2</sub> NMe             | PhCF <sub>3</sub>       | 12                  |
| 2 <sup>a</sup>  | Pd(PPh <sub>3</sub> ) <sub>4</sub>                 | dppf        | Cy <sub>2</sub> NMe             | PhCF <sub>3</sub>       | 76                  |
| 3 <sup>a</sup>  | Pd(PPh <sub>3</sub> ) <sub>4</sub>                 | dppf        | Cy <sub>2</sub> NMe             | dioxane                 | 40                  |
| 4 <sup>a</sup>  | Pd(PPh <sub>3</sub> ) <sub>4</sub>                 | dppf        | Cy <sub>2</sub> NMe             | THF                     | 35                  |
| 5 <sup>a</sup>  | Pd(PPh <sub>3</sub> ) <sub>4</sub>                 | dppf        | Cy <sub>2</sub> NMe             | DMAc                    | Trace               |
| 6 <sup>a</sup>  | Pd(PPh <sub>3</sub> ) <sub>4</sub>                 | dppf        | Cy <sub>2</sub> NMe             | toluene                 | 31                  |
| 7 <sup>a</sup>  | Pd(PPh <sub>3</sub> ) <sub>4</sub>                 | dppf        | Cy <sub>2</sub> NMe             | DMSO                    | Trace               |
| 8 <sup>a</sup>  | Pd(PPh <sub>3</sub> ) <sub>4</sub>                 | dppf        | Cy <sub>2</sub> NMe             | CH <sub>3</sub> CN      | < 5                 |
| 9 <sup>a</sup>  | Pd(PPh <sub>3</sub> ) <sub>4</sub>                 | dppf        | Cy <sub>2</sub> NMe             | DCE                     | Trace               |
| 10 <sup>a</sup> | Pd(PPh <sub>3</sub> ) <sub>4</sub>                 | BINAP       | Cy <sub>2</sub> NMe             | PhCF <sub>3</sub>       | 33                  |
| 11 <sup>a</sup> | Pd(PPh <sub>3</sub> ) <sub>4</sub>                 | dppm        | Cy <sub>2</sub> NMe             | PhCF <sub>3</sub>       | Trace               |
| 12 <sup>a</sup> | Pd(PPh <sub>3</sub> ) <sub>4</sub>                 | dppe        | Cy <sub>2</sub> NMe             | PhCF <sub>3</sub>       | Trace               |
| 13 <sup>a</sup> | Pd(PPh <sub>3</sub> ) <sub>4</sub>                 | dppp        | Cy <sub>2</sub> NMe             | PhCF <sub>3</sub>       | 25                  |
| 14 <sup>a</sup> | <b>Pd(PPh<sub>3</sub>)<sub>4</sub></b>             | <b>dppb</b> | <b>Cy<sub>2</sub>NMe</b>        | <b>PhCF<sub>3</sub></b> | <b>93</b>           |
| 15 <sup>a</sup> | Pd(PPh <sub>3</sub> ) <sub>4</sub>                 | L1          | Cy <sub>2</sub> NMe             | PhCF <sub>3</sub>       | 50                  |
| 16 <sup>a</sup> | Pd(PPh <sub>3</sub> ) <sub>4</sub>                 | DPEphos     | Cy <sub>2</sub> NMe             | PhCF <sub>3</sub>       | 75                  |
| 17 <sup>a</sup> | Pd(PPh <sub>3</sub> ) <sub>4</sub>                 | dippf       | Cy <sub>2</sub> NMe             | PhCF <sub>3</sub>       | 65                  |
| 18 <sup>a</sup> | Pd(PPh <sub>3</sub> ) <sub>4</sub>                 | xantphos    | Cy <sub>2</sub> NMe             | PhCF <sub>3</sub>       | 78                  |
| 19 <sup>a</sup> | Pd(PPh <sub>3</sub> ) <sub>4</sub>                 | L2          | Cy <sub>2</sub> NMe             | PhCF <sub>3</sub>       | 71                  |
| 20 <sup>a</sup> | Pd(PPh <sub>3</sub> ) <sub>4</sub>                 | dppb        | Et <sub>3</sub> N               | PhCF <sub>3</sub>       | Trace               |
| 21 <sup>a</sup> | Pd(PPh <sub>3</sub> ) <sub>4</sub>                 | dppb        | K <sub>2</sub> CO <sub>3</sub>  | PhCF <sub>3</sub>       | Trace               |
| 22 <sup>a</sup> | Pd(PPh <sub>3</sub> ) <sub>4</sub>                 | dppb        | CS <sub>2</sub> CO <sub>3</sub> | PhCF <sub>3</sub>       | Trace               |
| 23 <sup>b</sup> | w/o                                                | dppb        | Cy <sub>2</sub> NMe             | PhCF <sub>3</sub>       | Trace               |

Reaction conditions: <sup>a</sup>**1a** (0.2 mmol), **2a** (3.0 equiv.), base (3.0 equiv.), catalyst (8 mol%), ligand (10 mol%) and NaI (50 mol %) in 1 mL solvent at 100 °C for 20 h under Ar. <sup>b</sup>No catalyst. <sup>c</sup>isolated yield.

L1 = 1,5-Bis(Diphenylphosphino)Pentane, dippf = 1,1-bis(diisopropylphosphino)ferrocene, L2 = 1,1-Bis(di-*tert*-butylphosphino)ferrocene.

**b. Experimental Procedures for Examples Described (General Procedure)**

In air, acryloylbenzamide or *N*-arylacrylamide (0.2 mmol, 1.0 equiv.), Pd(PPh<sub>3</sub>)<sub>4</sub> (18 mg, 8 mol%), dppb (9 mg, 10 mol%), and NaI (15 mg, 50 mol%) were added to a schlenk tube equipped with a stir bar. The vessel was evacuated and filled with argon (three cycles). PhCF<sub>3</sub> (1.0 mL, 0.5 M), epoxide (3.0 equiv.), and Cy<sub>2</sub>NMe (128 μL, 3.0 equiv.) were added in turn by syringe. The resulting reaction mixture was stirred at 100 °C for 20 h. (If acryloylbenzamide or *N*-arylacrylamide was a liquid, add it through the syringe after adding the solvent). The residue was purified by silica gel (200-300 mesh) column chromatography using petroleum ether (PE) and ethyl acetate (EtOAc).

### III. Proposed Reaction Mechanism

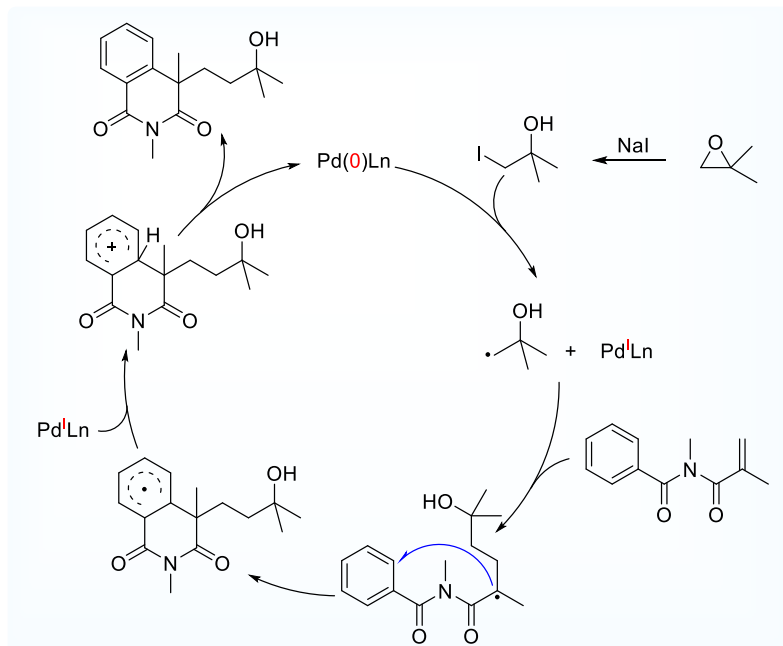

## IV. Substrate Scope, Spectral Data and NMR Spectra

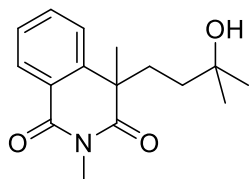**4-(3-hydroxy-3-methylbutyl)-2,4-dimethylisoquinoline-1,3(2H,4H)-dione**

Following the general procedure (**3a**, pale-yellow liquid, 51 mg, 93%). The residue was purified by silica gel-column chromatography using PE/EtOAc (2:1) as an eluent.  $^1\text{H NMR}$  (400 MHz, Chloroform-*d*)  $\delta$  8.22 (dd,  $J = 8.1, 1.5$  Hz, 1H), 7.68 – 7.55 (m, 1H), 7.48 – 7.37 (m, 2H), 3.36 (s, 3H), 2.38 (td,  $J = 13.0, 4.4$  Hz, 1H), 1.99 (td,  $J = 13.1, 4.1$  Hz, 1H), 1.61 (s, 3H), 1.08 (d,  $J = 6.5$  Hz, 6H), 1.03 (dd,  $J = 13.0, 4.5$  Hz, 1H), 0.85 (td,  $J = 13.0, 4.1$  Hz, 1H).  $^{13}\text{C NMR}$  (101 MHz, Chloroform-*d*)  $\delta$  176.77, 164.54, 143.52, 134.26, 128.93, 127.44, 125.22, 124.97, 70.34, 47.56, 38.80, 37.28, 30.06, 29.41, 28.93, 27.24.

**HRMS** (ESI)  $m/z$ :  $[\text{M} + \text{Na}]^+$  Calcd for  $\text{C}_{16}\text{H}_{21}\text{NNaO}_3$ : 298.1414; found: 298.1418.

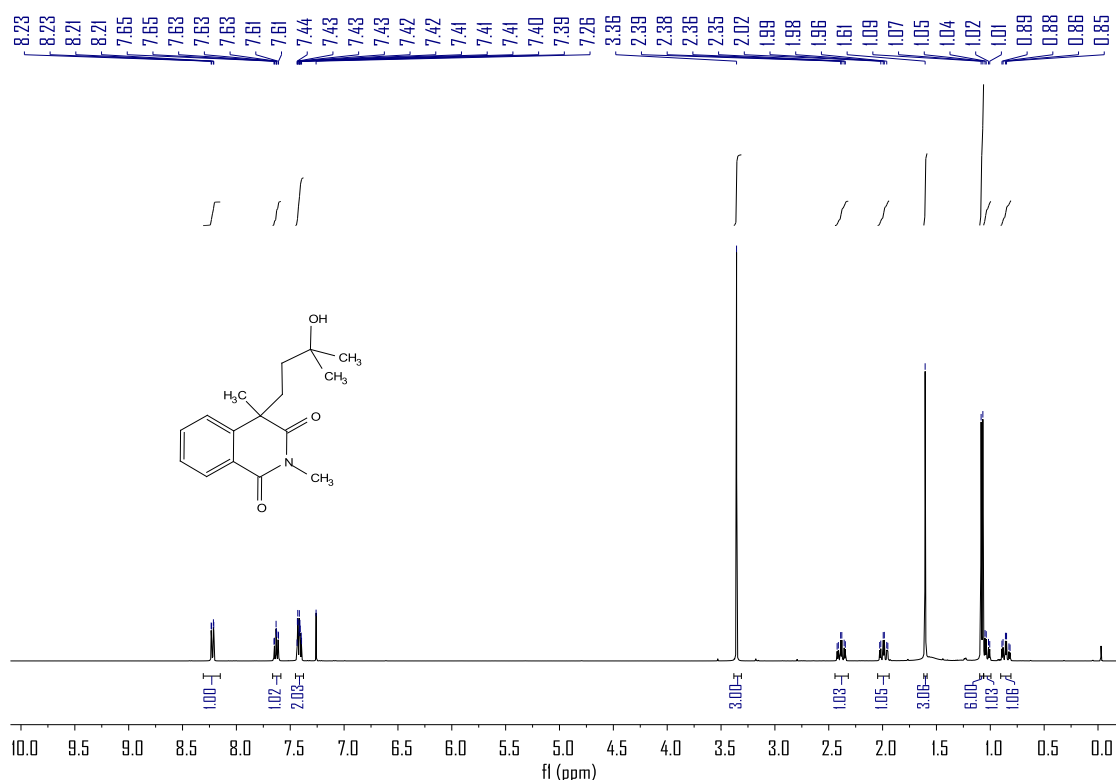

## Supporting Information

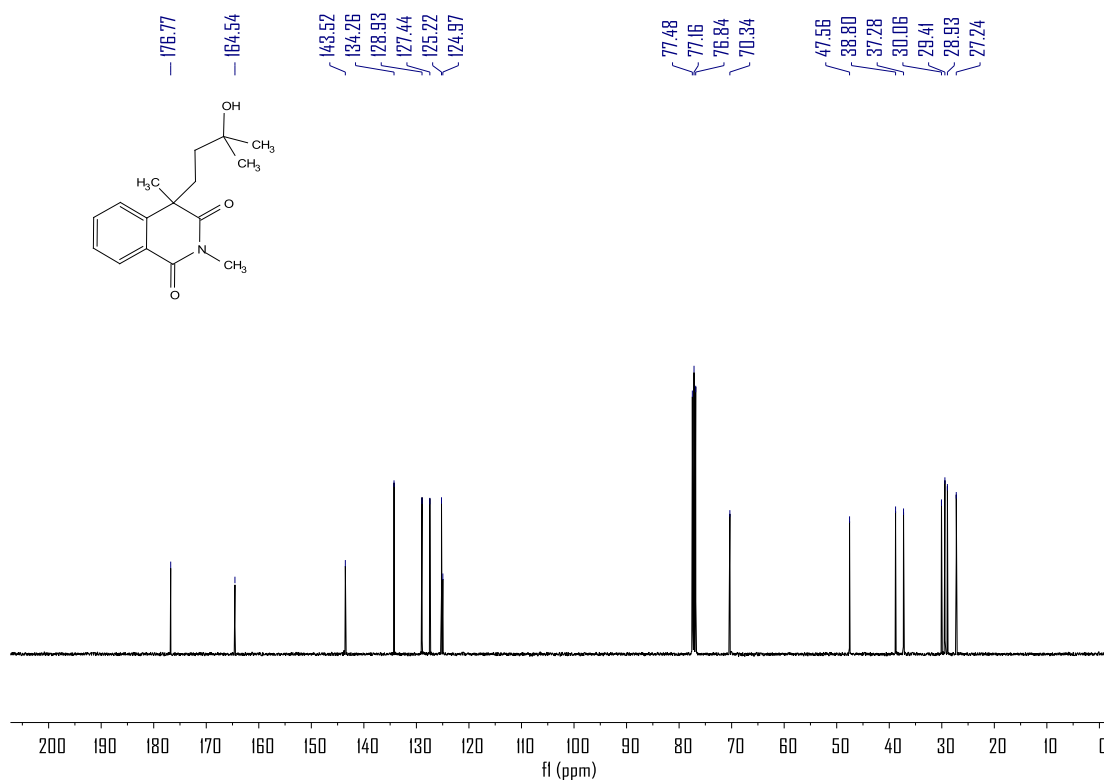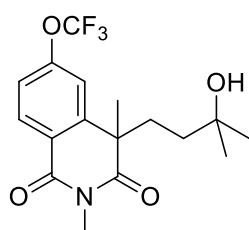

### 4-(3-hydroxy-3-methylbutyl)-2,4-dimethyl-6-(trifluoromethoxy)isoquinoline-1,3(2H, 4H)-dione

Following the general procedure (**3b**, pale-yellow liquid, 58 mg, 81%). The residue was purified by silica gel-column chromatography using PE/EtOAc (2:1) as an eluent. **<sup>1</sup>H NMR** (400 MHz, Chloroform-*d*)  $\delta$  8.32 (d,  $J$  = 8.7 Hz, 1H), 7.36 – 7.24 (m, 2H), 3.38 (s, 3H), 2.44 (td,  $J$  = 13.1, 4.5 Hz, 1H), 1.96 (td,  $J$  = 13.1, 3.9 Hz, 1H), 1.64 (s, 3H), 1.40 (s, 1H), 1.16 – 1.04 (m, 7H), 0.87 (td,  $J$  = 13.0, 3.9 Hz, 1H). **<sup>13</sup>C NMR** (101 MHz, Chloroform-*d*)  $\delta$  176.05, 163.38, 153.63, 146.06, 131.45, 123.39, 120.33 (q,  $J$  = 259.6 Hz), 119.62, 117.08, 70.27, 47.83, 38.77, 37.33, 29.97, 29.25, 29.00, 27.35. **<sup>19</sup>F NMR** (376 MHz, Chloroform-*d*)  $\delta$  -57.59.

**HRMS** (ESI)  $m/z$ :  $[M + Na]^+$  Calcd for C<sub>17</sub>H<sub>20</sub>F<sub>3</sub>NNaO<sub>4</sub>: 382.1237; found: 382.1235.

## Supporting Information

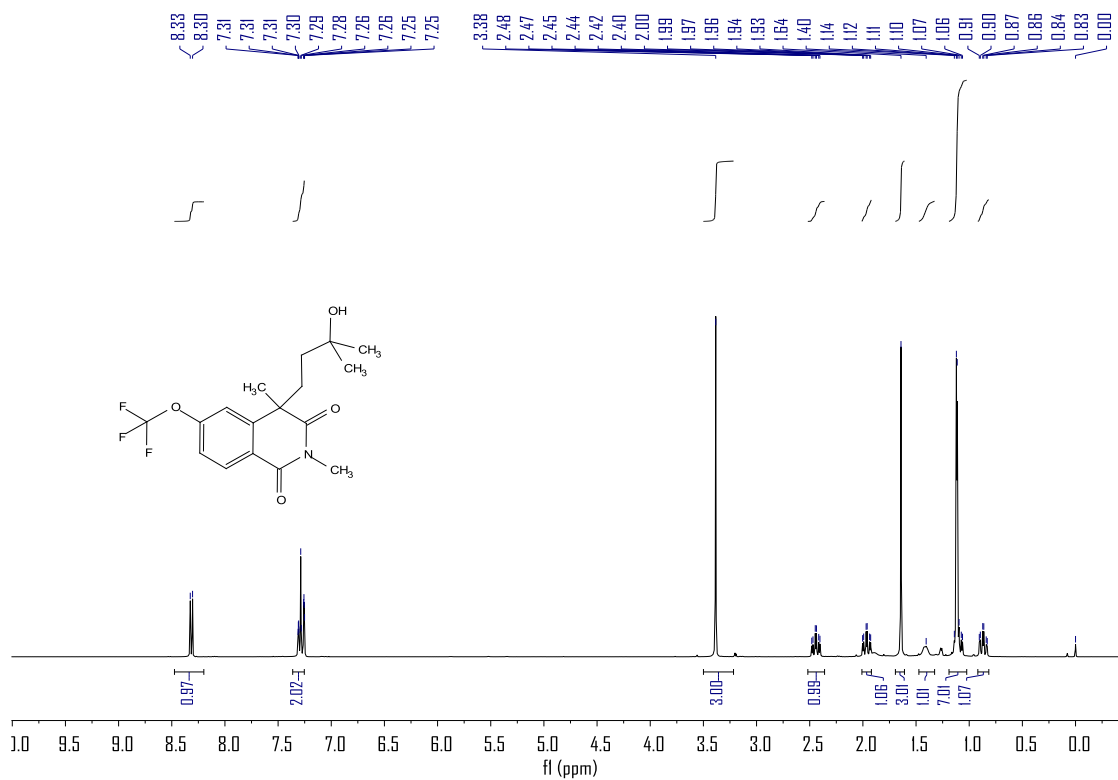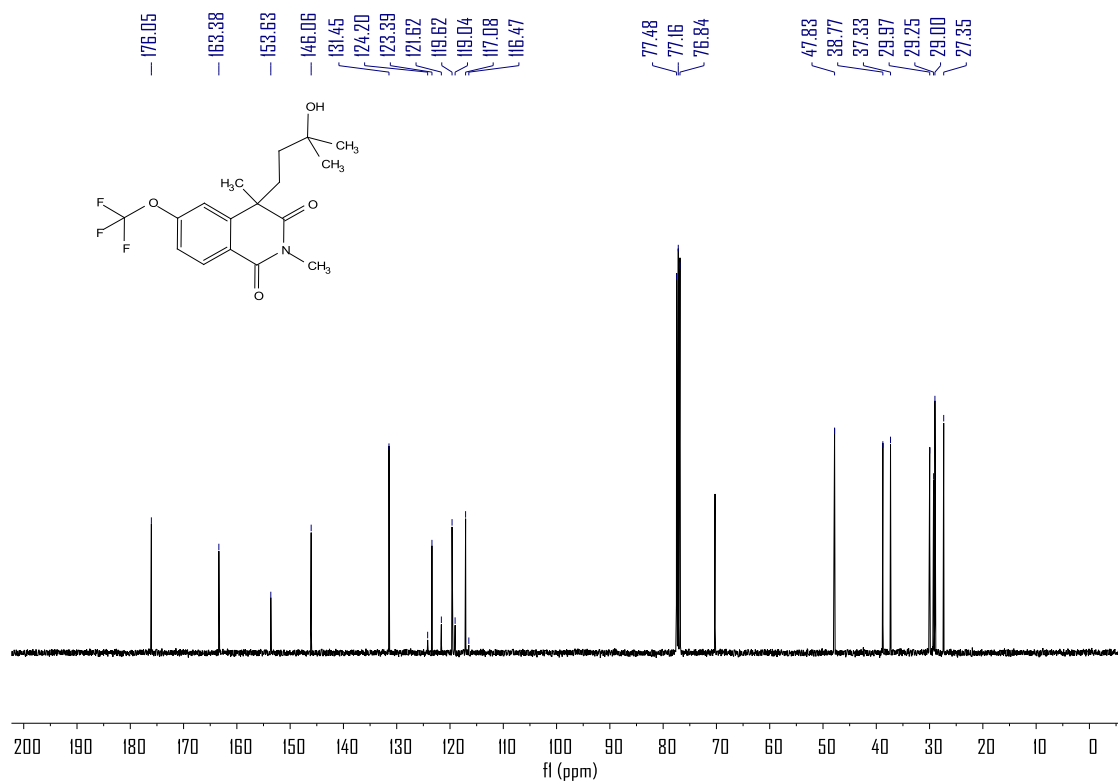



-57.59

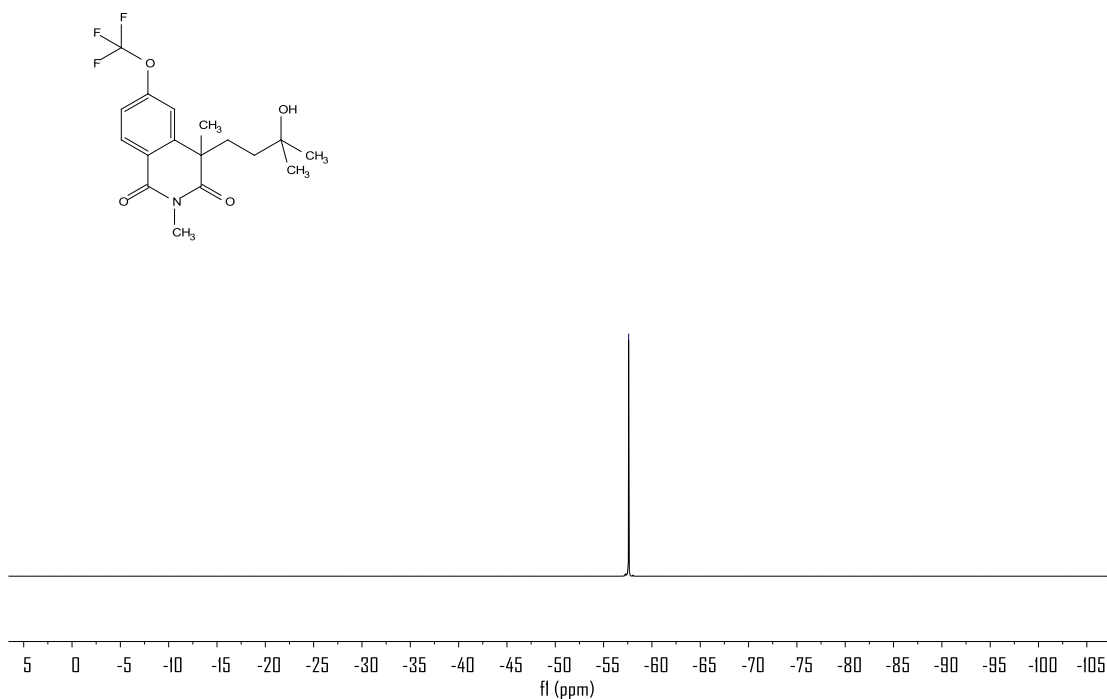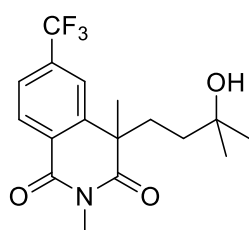

#### 4-(3-hydroxy-3-methylbutyl)-2,4-dimethyl-6-(trifluoromethyl)isoquinoline-1,3(2H,4H)-dione

Following the general procedure (**3c**, pale-yellow liquid, 43 mg, 63%). The residue was purified by silica gel-column chromatography using PE/EtOAc (2:1) as an eluent.  $^1\text{H}$  NMR (400 MHz, Chloroform-*d*)  $\delta$  8.38 (dt,  $J = 8.1, 0.9$  Hz, 1H), 7.75 – 7.65 (m, 2H), 3.40 (s, 3H), 2.44 (td,  $J = 13.1, 4.5$  Hz, 1H), 2.01 (td,  $J = 13.1, 4.0$  Hz, 1H), 1.66 (s, 3H), 1.18 (s, 1H), 1.13 – 1.05 (m, 7H), 0.83 (td,  $J = 13.0, 4.0$  Hz, 1H).  $^{13}\text{C}$  NMR (101 MHz, Chloroform-*d*)  $\delta$  175.90, 163.44, 144.37, 135.77 (q,  $J = 33.0$  Hz), 129.89, 127.93, 124.32 (q,  $J = 3.5$  Hz), 123.50 (q,  $J = 273.0$  Hz), 122.49 (q,  $J = 3.7$  Hz), 70.34, 47.82, 38.79, 37.39, 29.88, 29.38, 28.99, 27.51.  $^{19}\text{F}$  NMR (376 MHz, Chloroform-*d*)  $\delta$  -63.13.

HRMS (ESI)  $m/z$ :  $[\text{M} + \text{Na}]^+$  Calcd for  $\text{C}_{17}\text{H}_{20}\text{F}_3\text{NNaO}_3$ : 366.1287; found: 366.1296.

## Supporting Information

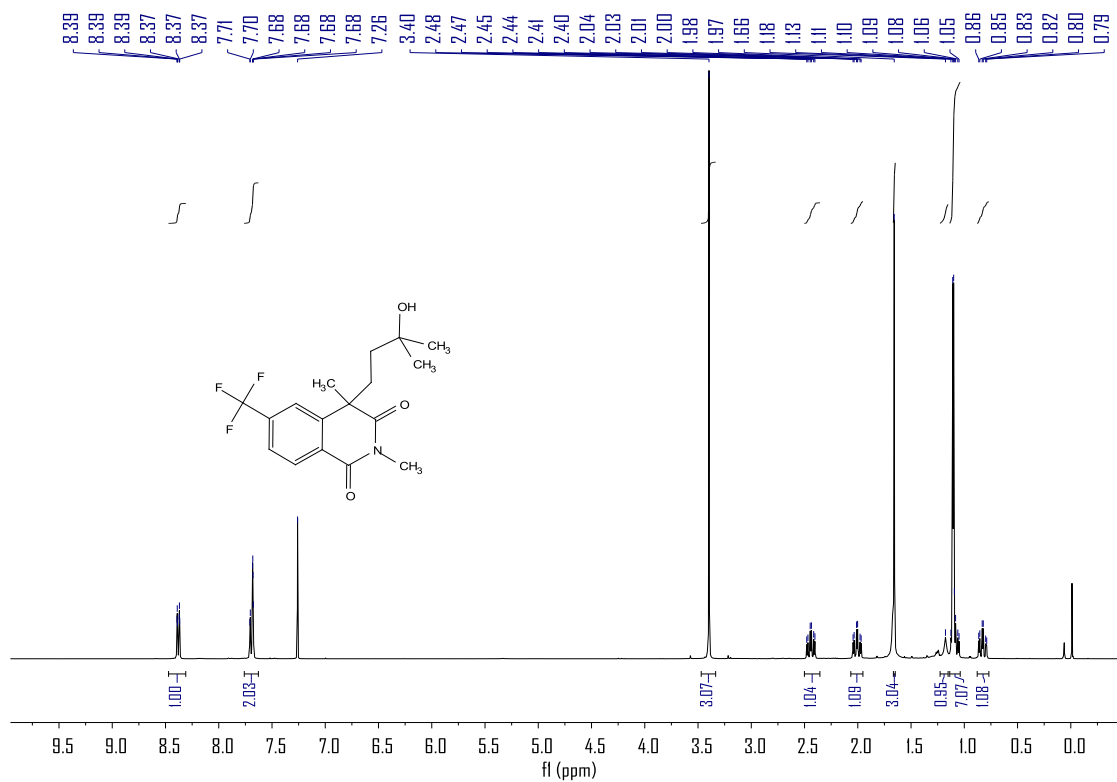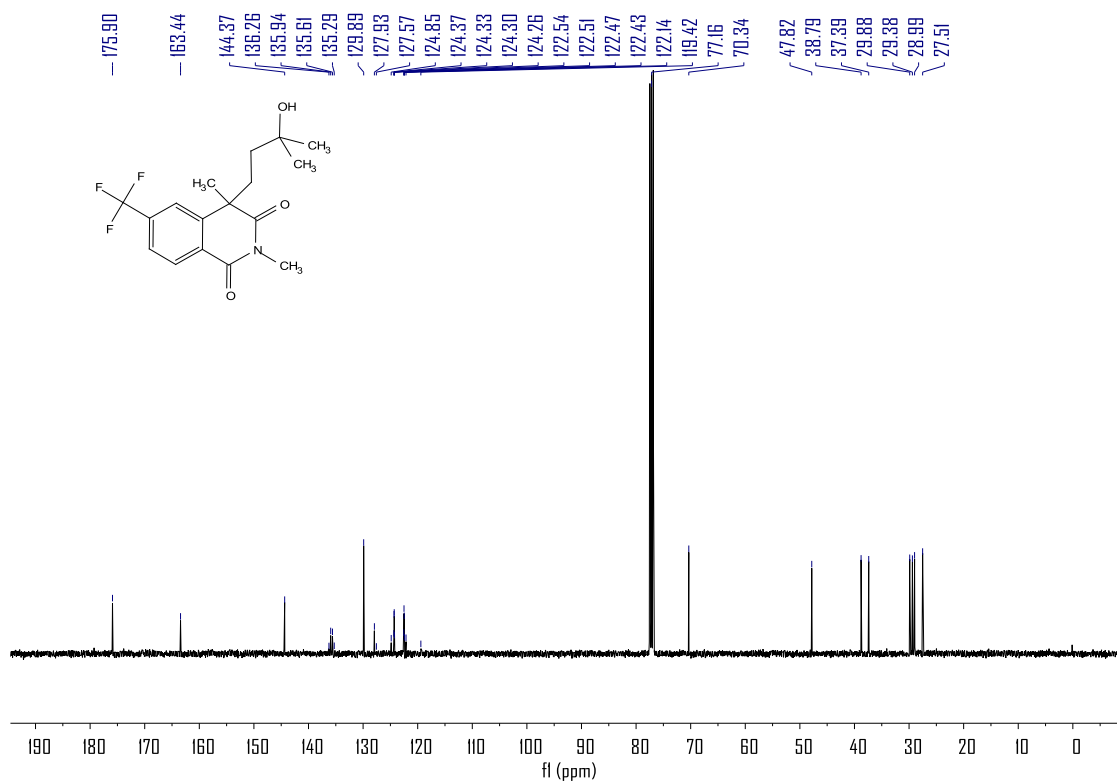

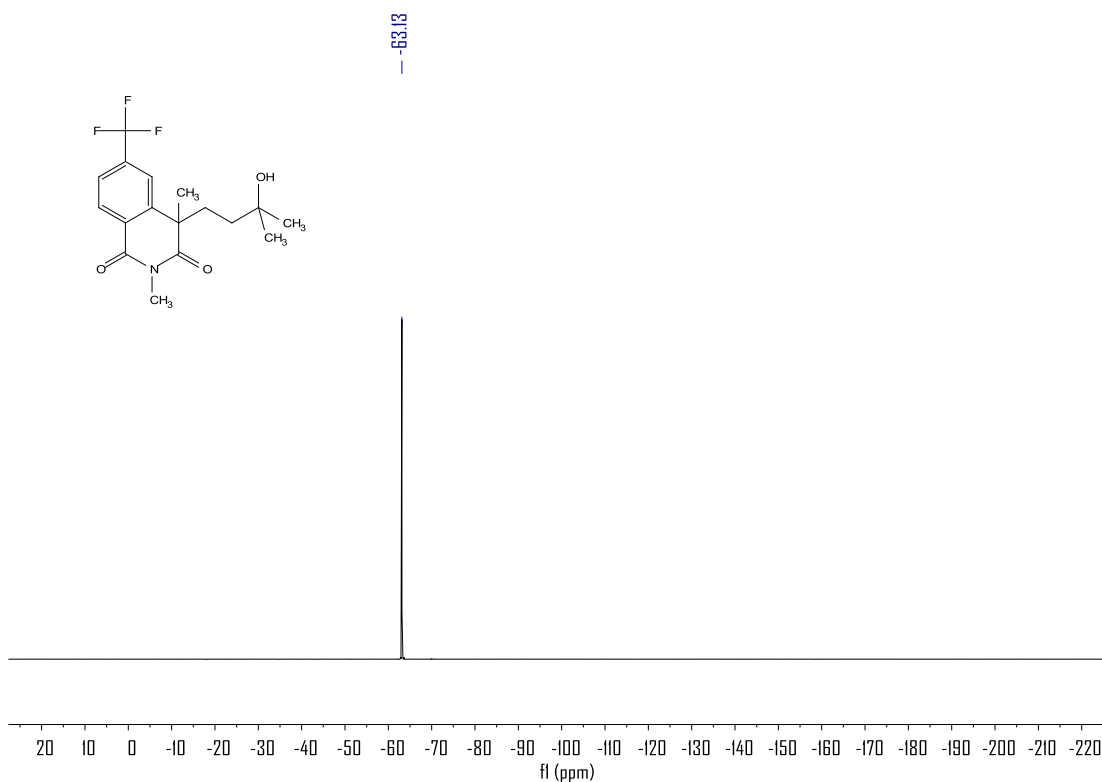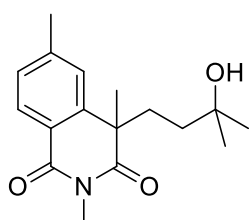

#### 4-(3-hydroxy-3-methylbutyl)-2,4,6-trimethylisoquinoline-1,3(2H,4H)-dione

Following the general procedure (**3d**, pale-yellow liquid, 52 mg, 90%). The residue was purified by silica gel-column chromatography using PE/EtOAc (2:1) as an eluent.  $^1\text{H}$  NMR (400 MHz, Chloroform-*d*)  $\delta$  8.09 (dt,  $J = 7.9, 1.5$  Hz, 1H), 7.30 – 7.11 (m, 2H), 3.33 (t,  $J = 1.7$  Hz, 3H), 2.42 (s, 3H), 2.35 (td,  $J = 13.0, 4.3$  Hz, 1H), 1.96 (td,  $J = 13.1, 4.2$  Hz, 1H), 1.58 (s, 3H), 1.41 (s, 1H), 1.08 (d,  $J = 6.6$  Hz, 6H), 1.01 (dd,  $J = 12.9, 4.5$  Hz, 1H), 0.87 (td,  $J = 13.1, 4.2$  Hz, 1H).  $^{13}\text{C}$  NMR (101 MHz, Chloroform-*d*)  $\delta$  176.91, 164.54, 145.09, 143.54, 128.91, 128.54, 125.55, 122.47, 70.35, 47.47, 38.79, 37.35, 29.95, 29.40, 28.89, 27.13, 22.09.

HRMS (ESI)  $m/z$ :  $[\text{M} + \text{Na}]^+$  Calcd for  $\text{C}_{17}\text{H}_{23}\text{NNaO}_3$ : 312.1570; found: 312.1576.

## Supporting Information

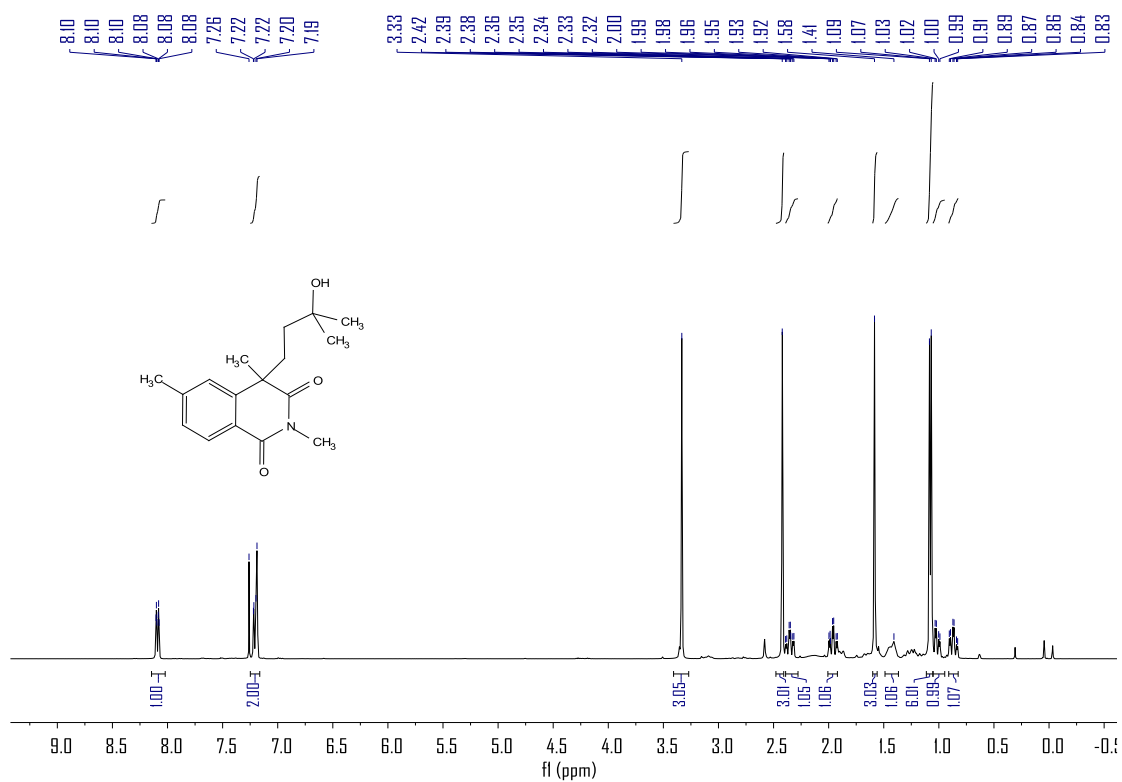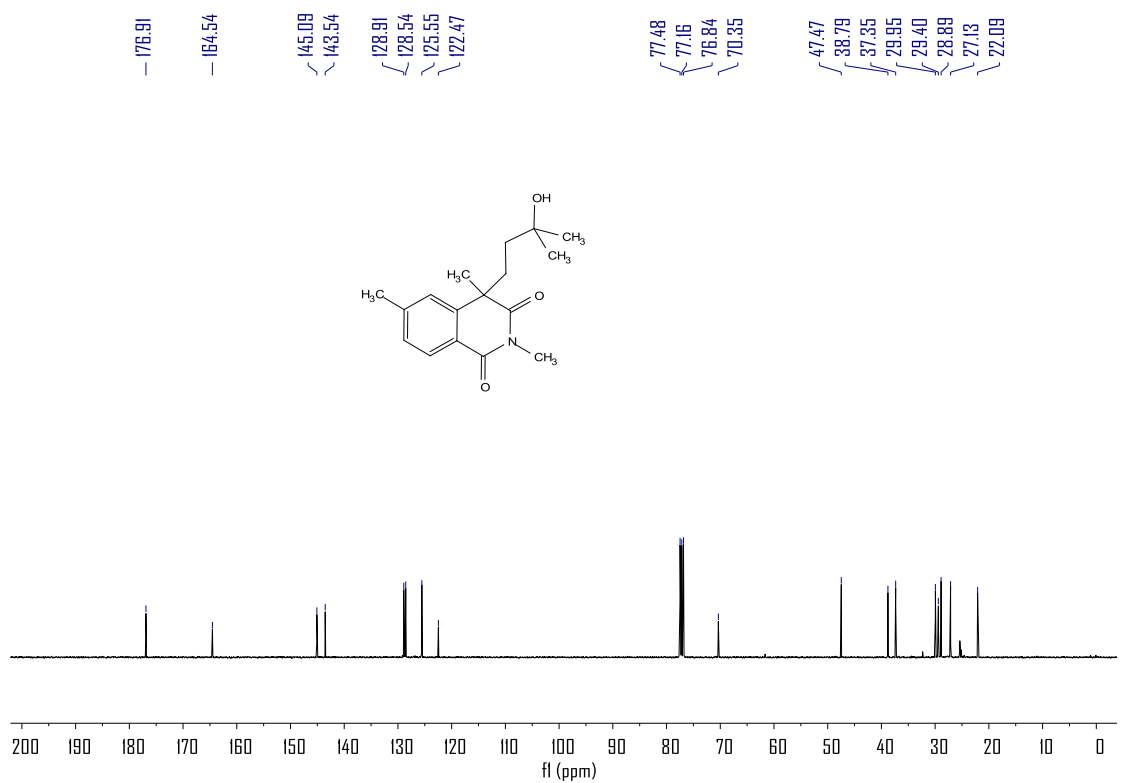

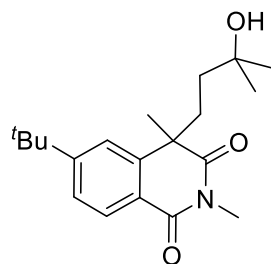

**6-(tert-butyl)-4-(3-hydroxy-3-methylbutyl)-2,4-dimethylisoquinoline-1,3(2H,4H)-dione**

Following the general procedure (**3e**, pale-yellow liquid, 54 mg, 82%). The residue was purified by silica gel-column chromatography using PE/EtOAc (2:1) as an eluent.  $^1\text{H NMR}$  (400 MHz, Chloroform-*d*)  $\delta$  8.13 (dd,  $J = 8.3, 1.5$  Hz, 1H), 7.44 (dd,  $J = 8.4, 1.7$  Hz, 1H), 7.39 (d,  $J = 1.7$  Hz, 1H), 3.34 (t,  $J = 1.3$  Hz, 3H), 2.44 – 2.30 (m, 1H), 1.98 (td,  $J = 13.0, 3.7$  Hz, 1H), 1.60 (d,  $J = 1.3$  Hz, 3H), 1.33 (s, 9H), 1.15 – 1.02 (m, 7H), 0.81 (td,  $J = 13.0, 3.6$  Hz, 1H).  $^{13}\text{C NMR}$  (101 MHz, Chloroform-*d*)  $\delta$  177.00, 164.48, 158.00, 143.13, 128.74, 124.77, 122.47, 121.83, 70.37, 47.73, 38.87, 37.28, 35.43, 31.18, 30.25, 29.07, 29.05, 27.13.

**HRMS** (ESI)  $m/z$ :  $[\text{M} + \text{Na}]^+$  Calcd for  $\text{C}_{20}\text{H}_{29}\text{NNaO}_3$ : 354.2040; found: 354.2045.

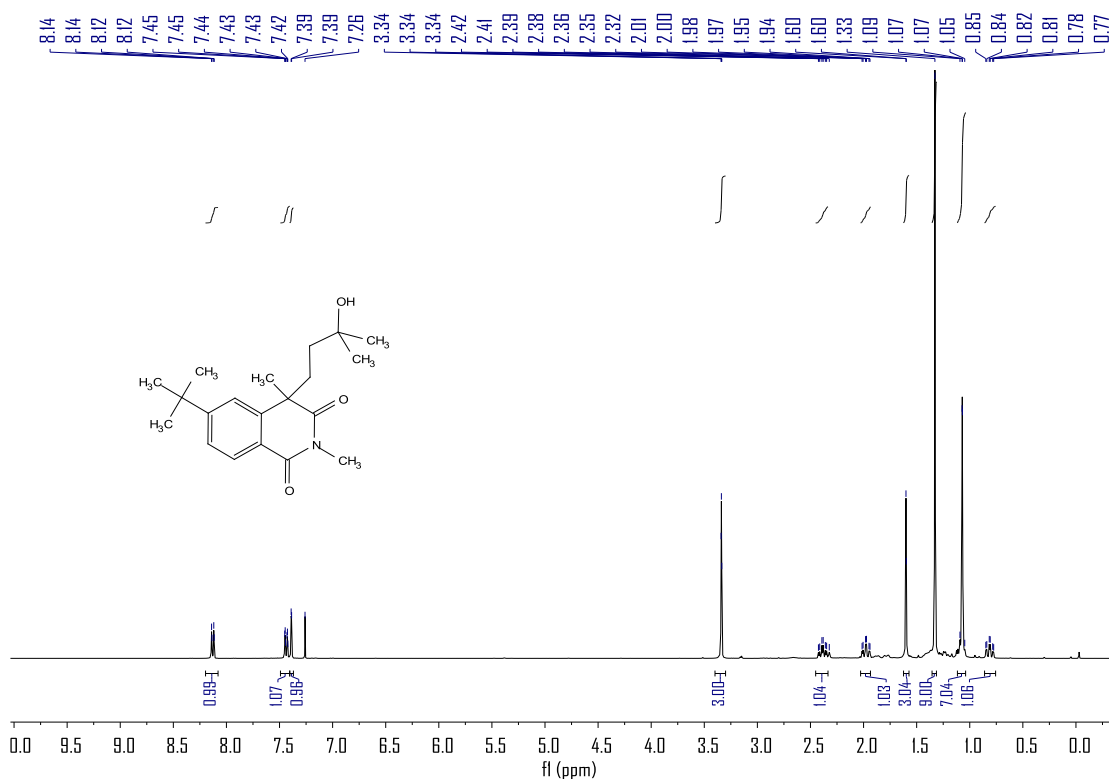

## Supporting Information

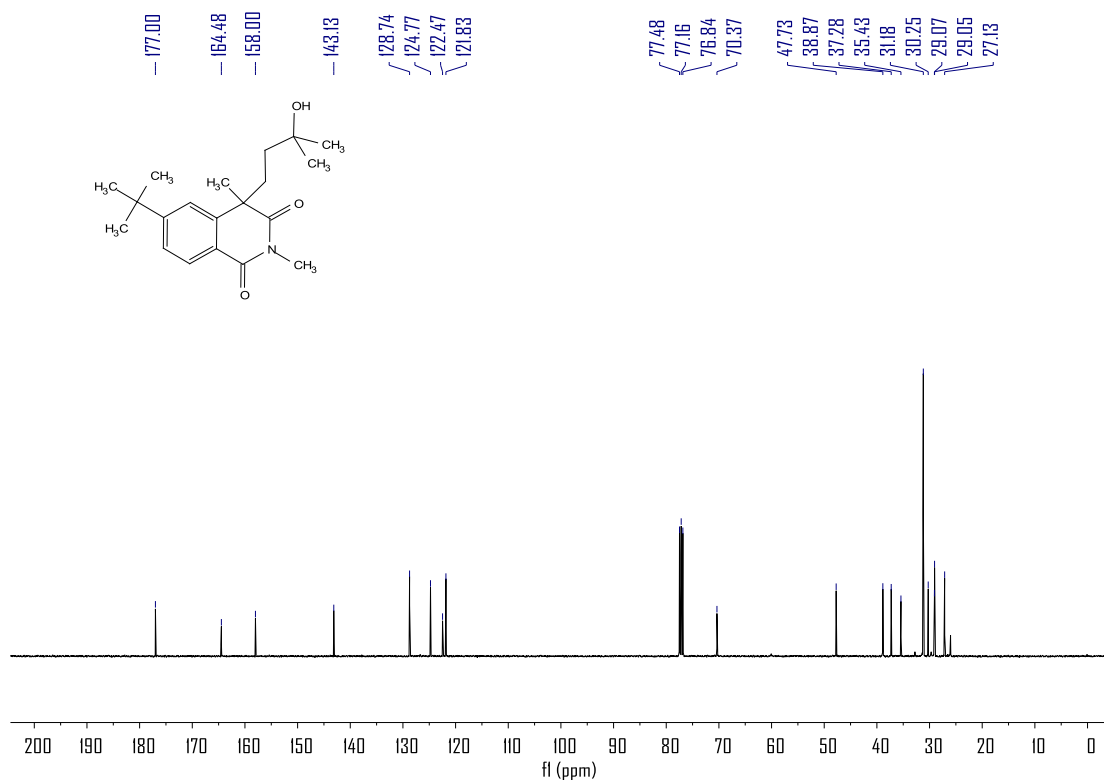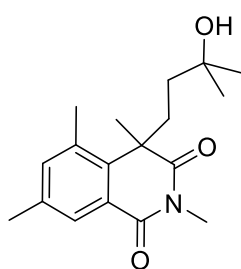

### 4-(3-hydroxy-3-methylbutyl)-2,4,5,7-tetramethylisoquinoline-1,3(2H,4H)-dione

Following the general procedure (**3f**, pale-yellow liquid, 45 mg, 75%). The residue was purified by silica gel-column chromatography using PE/EtOAc (2:1) as an eluent.  $^1\text{H NMR}$  (400 MHz, Chloroform-*d*)  $\delta$  8.02 (s, 1H), 7.24 (s, 1H), 3.37 (s, 3H), 2.56 (s, 3H), 2.44 – 2.38 (m, 2H), 2.36 (s, 3H), 1.70 (s, 3H), 1.45 (s, 1H), 1.10 (d,  $J = 6.6$  Hz, 6H), 1.03 – 0.92 (m, 1H), 0.90 – 0.81 (m, 1H).  $^{13}\text{C NMR}$  (101 MHz, Chloroform-*d*)  $\delta$  177.93, 164.98, 139.83, 137.71, 137.10, 135.45, 128.13, 126.01, 70.48, 48.93, 39.50, 33.82, 29.63, 28.95, 27.56, 27.04, 22.64, 20.71.

**HRMS** (ESI)  $m/z$ :  $[\text{M} + \text{Na}]^+$  Calcd for  $\text{C}_{18}\text{H}_{25}\text{NNaO}_3$ : 326.1727; found: 326.1733.

## Supporting Information

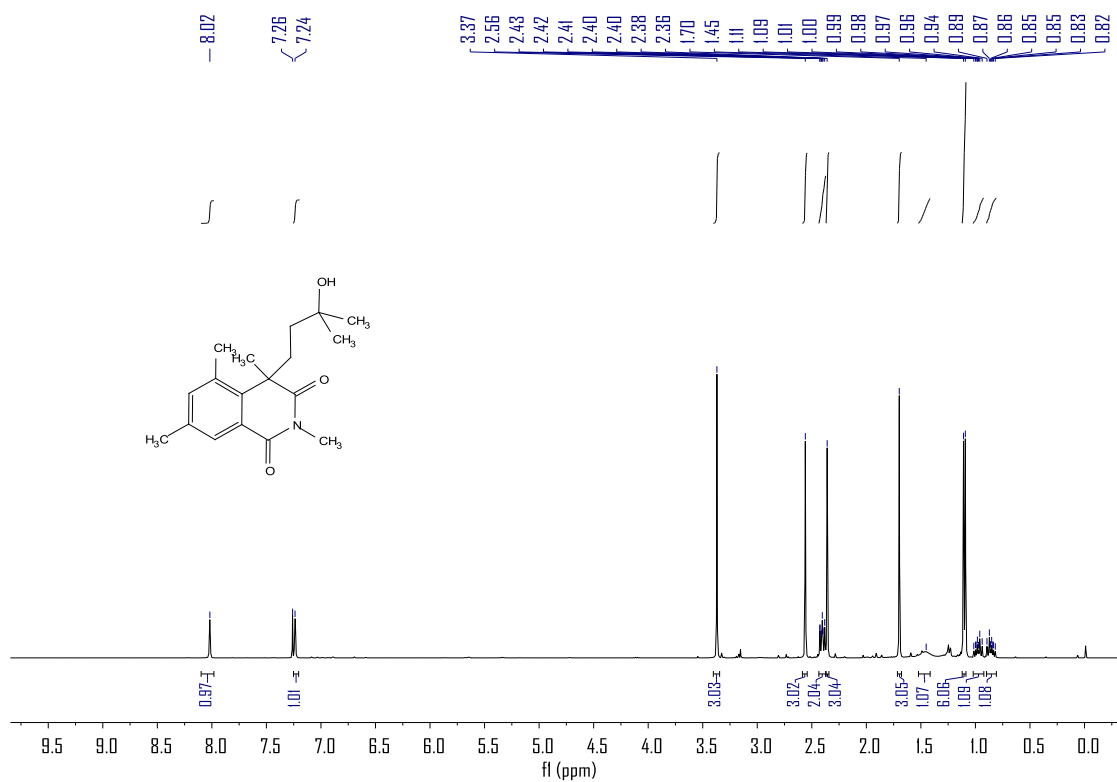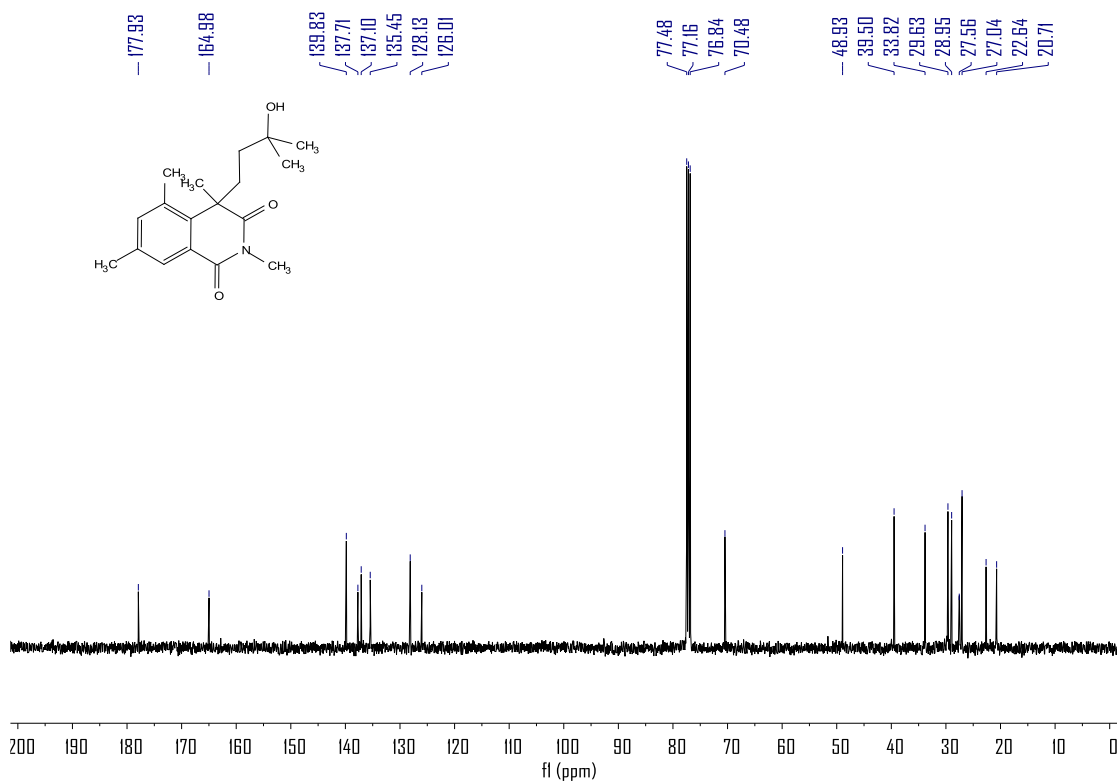

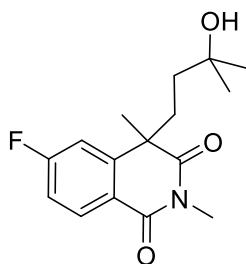

**6-fluoro-4-(3-hydroxy-3-methylbutyl)-2,4-dimethylisoquinoline-1,3(2H,4H)-dione**

Following the general procedure (**3g**, pale-yellow liquid, 45 mg, 77%). The residue was purified by silica gel-column chromatography using PE/EtOAc (2:1) as an eluent.  $^1\text{H}$  NMR (400 MHz, Chloroform-*d*)  $\delta$  8.33 – 8.22 (m, 1H), 7.16 – 7.03 (m, 2H), 3.34 (s, 3H), 2.39 (td,  $J = 13.1, 4.4$  Hz, 1H), 1.93 (td,  $J = 13.1, 4.2$  Hz, 1H), 1.78 (s, 1H), 1.60 (s, 3H), 1.13 – 1.00 (m, 7H), 0.89 (td,  $J = 13.0, 4.1$  Hz, 1H).  $^{19}\text{F}$  NMR (376 MHz, Chloroform-*d*)  $\delta$  -103.16 (q,  $J = 8.4$  Hz).  $^{13}\text{C}$  NMR (101 MHz, Chloroform-*d*)  $\delta$  176.25, 166.63 (d,  $J = 255.7$  Hz), 163.57, 146.75 (d,  $J = 8.5$  Hz), 132.03 (d,  $J = 9.7$  Hz), 121.54 (d,  $J = 2.5$  Hz), 115.49 (d,  $J = 22.3$  Hz), 112.14 (d,  $J = 23.0$  Hz), 70.29, 47.89, 38.76, 37.41, 29.89, 29.50, 28.96, 27.23.

**HRMS** (ESI)  $m/z$ :  $[\text{M} + \text{Na}]^+$  Calcd for  $\text{C}_{16}\text{H}_{20}\text{FNNaO}_3$ : 316.1319; found: 316.1325.

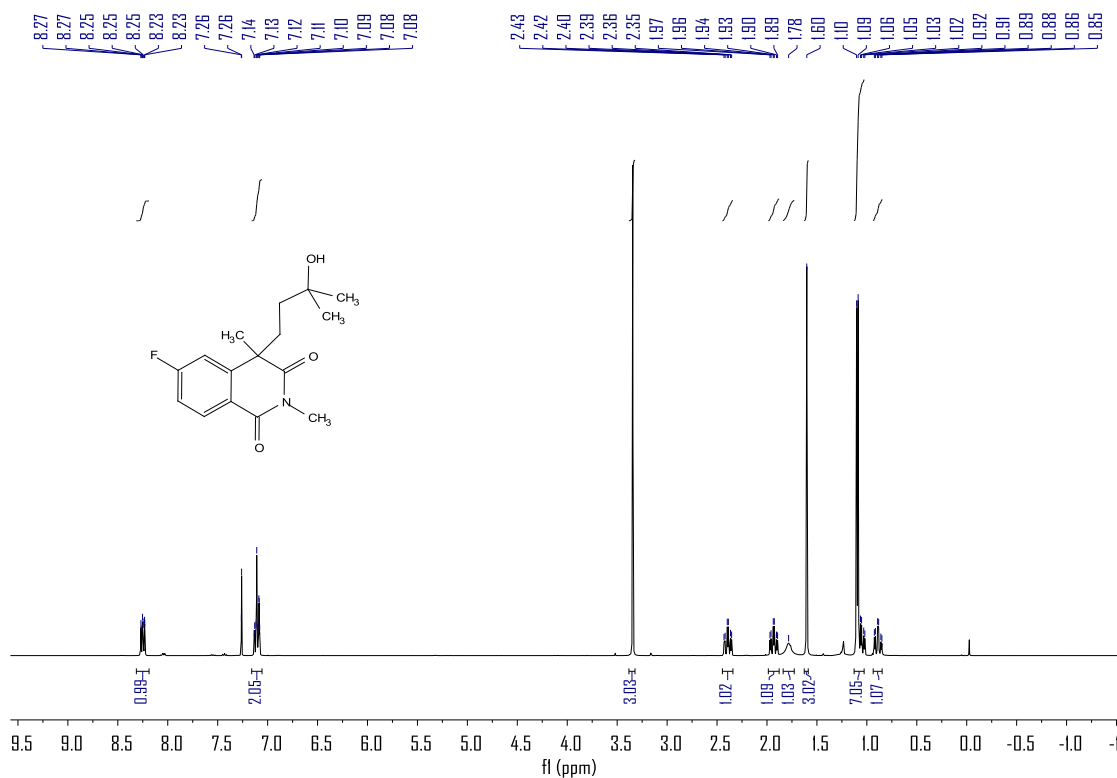



# Supporting Information

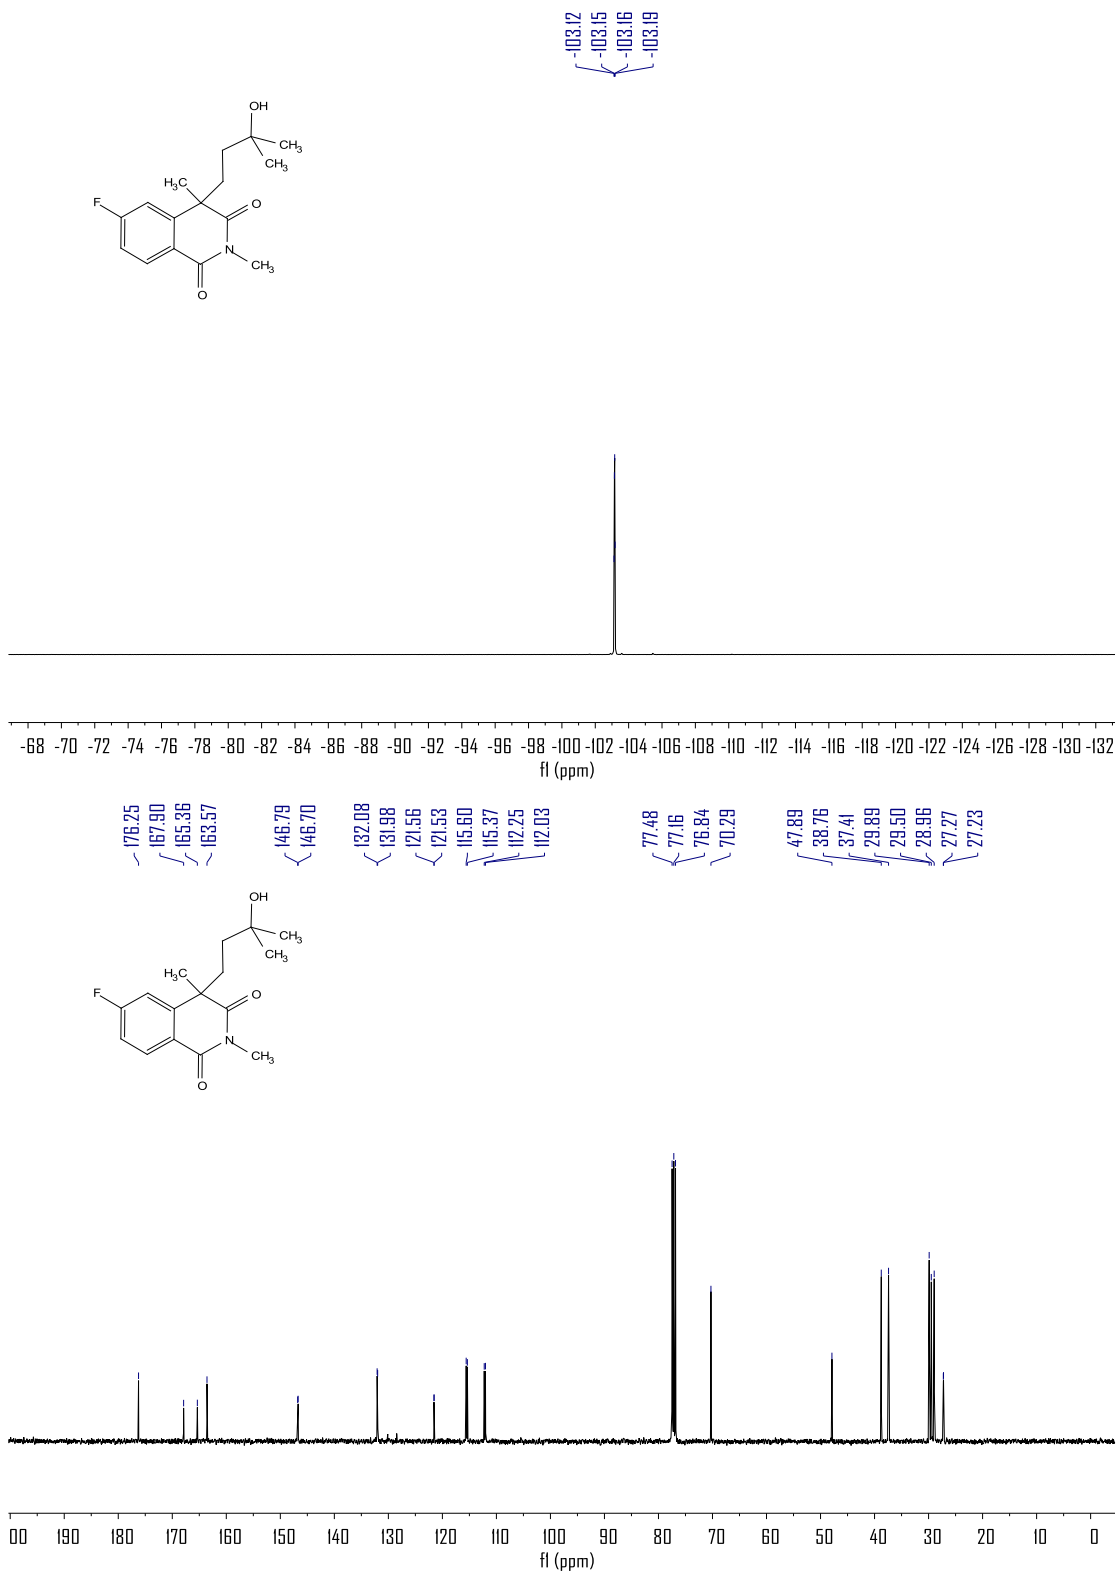

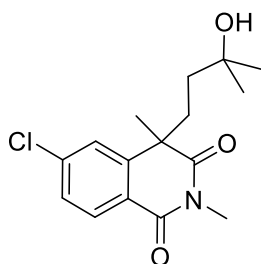

**6-chloro-4-(3-hydroxy-3-methylbutyl)-2,4-dimethylisoquinoline-1,3(2H,4H)-dione**

Following the general procedure (**3h**, pale-yellow liquid, 38 mg, 62%). The residue was purified by silica gel-column chromatography using PE/EtOAc (2:1) as an eluent.  $^1\text{H NMR}$  (400 MHz, Chloroform-*d*)  $\delta$  8.18 (d,  $J = 9.0$  Hz, 1H), 7.46 – 7.36 (m, 2H), 3.36 (s, 3H), 2.40 (td,  $J = 13.0, 4.4$  Hz, 1H), 1.95 (td,  $J = 13.0, 4.2$  Hz, 1H), 1.62 (s, 3H), 1.16 – 1.01 (m, 7H), 0.90 (td,  $J = 13.0, 4.2$  Hz, 1H).  $^{13}\text{C NMR}$  (101 MHz, Chloroform-*d*)  $\delta$  176.08, 163.71, 145.37, 140.90, 130.63, 128.19, 125.54, 123.62, 70.35, 47.77, 38.83, 37.45, 29.80, 29.56, 29.00, 27.35.

**HRMS** (ESI)  $m/z$ :  $[\text{M} + \text{Na}]^+$  Calcd for  $\text{C}_{16}\text{H}_{20}\text{ClNNaO}_3$ : 332.1024; found: 332.1027.

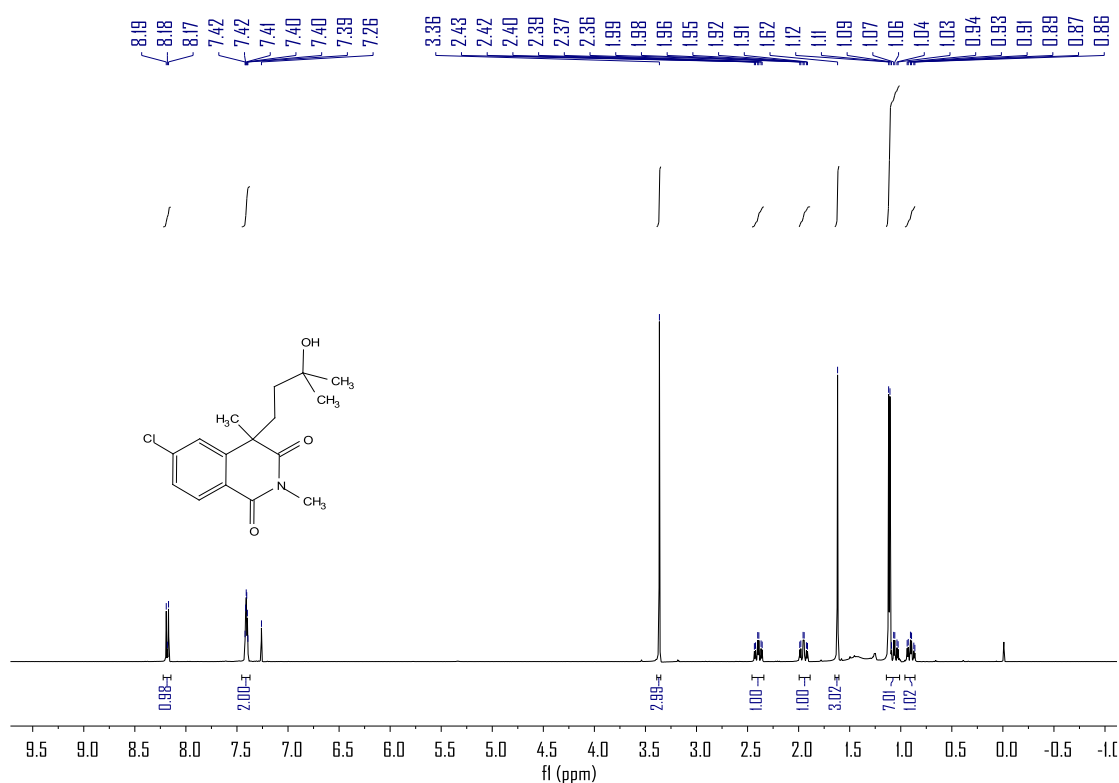

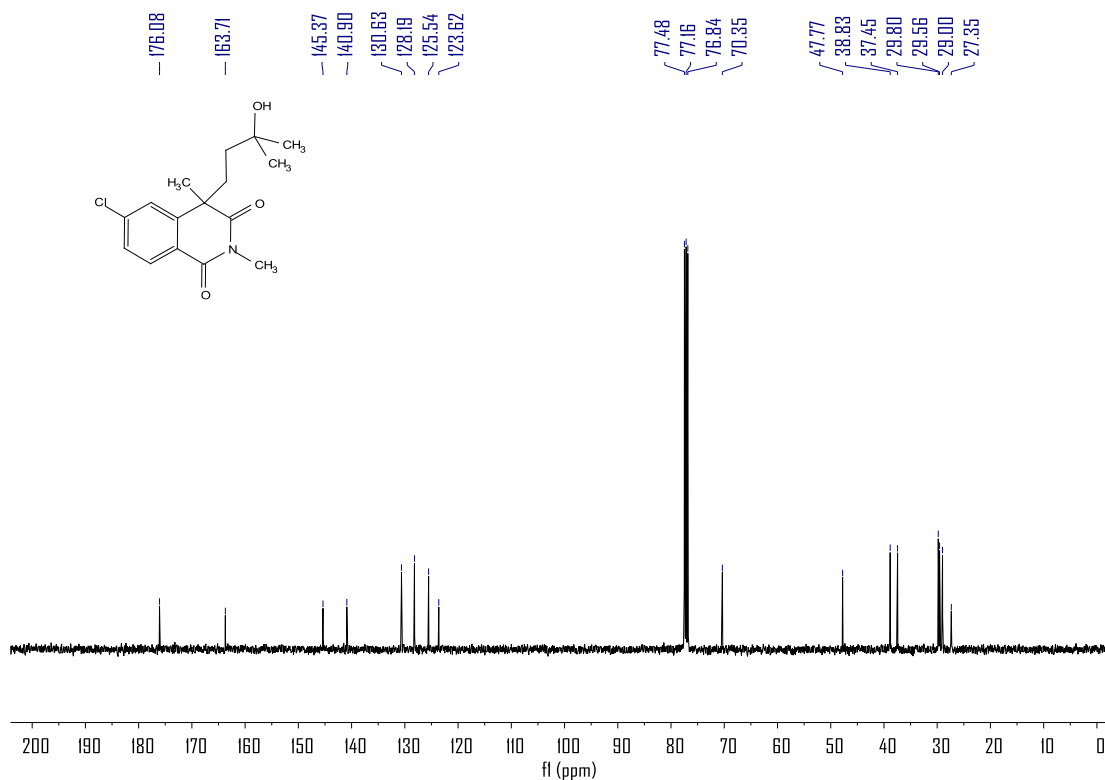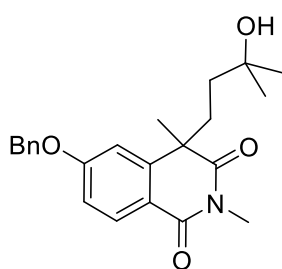

**6-(benzyloxy)-4-(3-hydroxy-3-methylbutyl)-2,4-dimethylisoquinoline-1,3(2H,4H)-dione**

Following the general procedure (**3i**, pale-yellow liquid, 65 mg, 86%). The residue was purified by silica gel-column chromatography using PE/EtOAc (2:1) as an eluent.  $^1\text{H NMR}$  (400 MHz, Chloroform-*d*)  $\delta$  8.19 (d,  $J = 8.8$  Hz, 1H), 7.46 – 7.30 (m, 5H), 7.03 (dd,  $J = 8.8, 2.4$  Hz, 1H), 6.93 (d,  $J = 2.4$  Hz, 1H), 5.14 (d,  $J = 2.5$  Hz, 2H), 3.34 (s, 3H), 2.37 (td,  $J = 12.9, 4.4$  Hz, 1H), 1.91 (td,  $J = 13.0, 4.2$  Hz, 1H), 1.58 (s, 3H), 1.46 (s, 1H), 1.08 (d,  $J = 7.4$  Hz, 7H), 0.89 (td,  $J = 12.9, 4.1$  Hz, 1H).  $^{13}\text{C NMR}$  (101 MHz, Chloroform-*d*)  $\delta$  176.80, 164.12, 163.52, 145.88, 136.05, 131.30, 128.88, 128.49, 127.61, 118.32, 114.41, 111.08, 70.42, 70.35, 47.85, 38.86, 37.33, 30.11, 29.50, 28.92, 27.10.

**HRMS** (ESI)  $m/z$ :  $[\text{M} + \text{Na}]^+$  Calcd for  $\text{C}_{23}\text{H}_{27}\text{NNaO}_4$ : 404.1832; found: 404.1839.

## Supporting Information

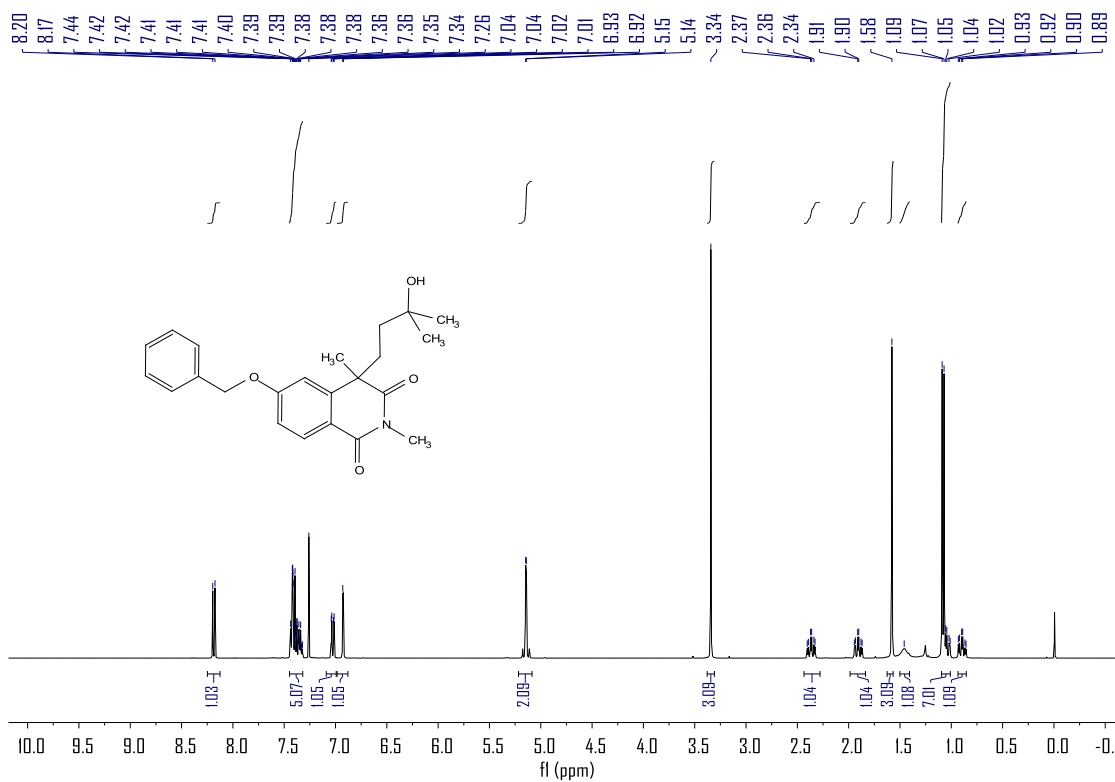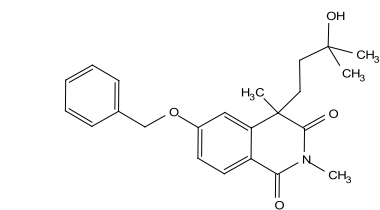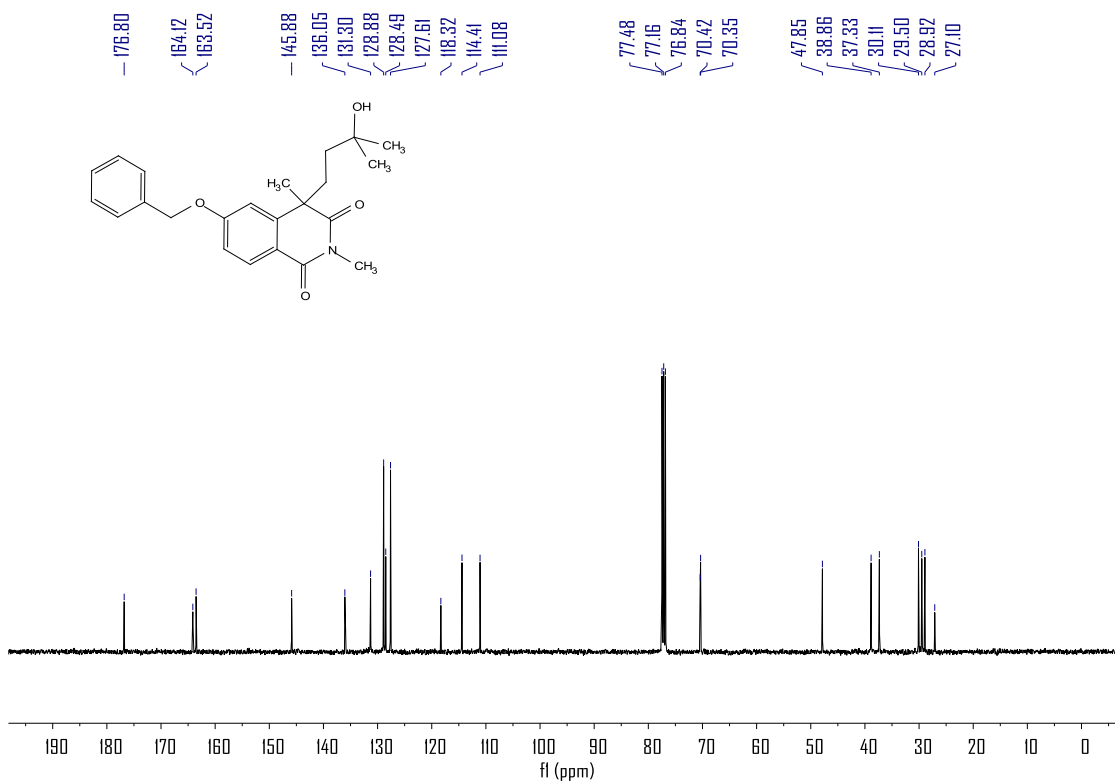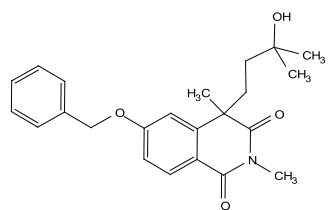

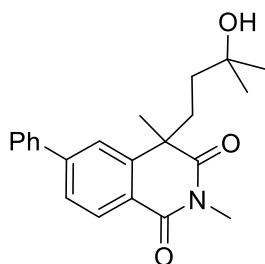

#### 4-(3-hydroxy-3-methylbutyl)-2,4-dimethyl-6-phenylisoquinoline-1,3(2H,4H)-dione

Following the general procedure (**3j**, pale-yellow liquid, 52 mg, 74%). The residue was purified by silica gel-column chromatography using PE/EtOAc (2:1) as an eluent.  $^1\text{H NMR}$  (400 MHz, Chloroform-*d*)  $\delta$  8.29 (d,  $J = 8.1$  Hz, 1H), 7.68 – 7.58 (m, 4H), 7.53 – 7.40 (m, 3H), 3.38 (s, 3H), 2.44 (td,  $J = 13.0, 4.5$  Hz, 1H), 2.09 (td,  $J = 13.0, 4.0$  Hz, 1H), 1.67 (s, 3H), 1.55 (s, 1H), 1.11 (d,  $J = 7.2$  Hz, 7H), 0.96 (td,  $J = 13.0, 4.0$  Hz, 1H).  $^{13}\text{C NMR}$  (101 MHz, Chloroform-*d*)  $\delta$  176.73, 164.38, 147.05, 144.05, 139.78, 129.53, 129.15, 128.65, 127.43, 126.39, 123.84, 123.80, 70.33, 47.80, 38.90, 37.40, 30.04, 29.50, 28.92, 27.25, 27.22.

**HRMS** (ESI)  $m/z$ :  $[\text{M} + \text{Na}]^+$  Calcd for  $\text{C}_{22}\text{H}_{25}\text{NNaO}_3$ : 374.1727; found: 374.1735.

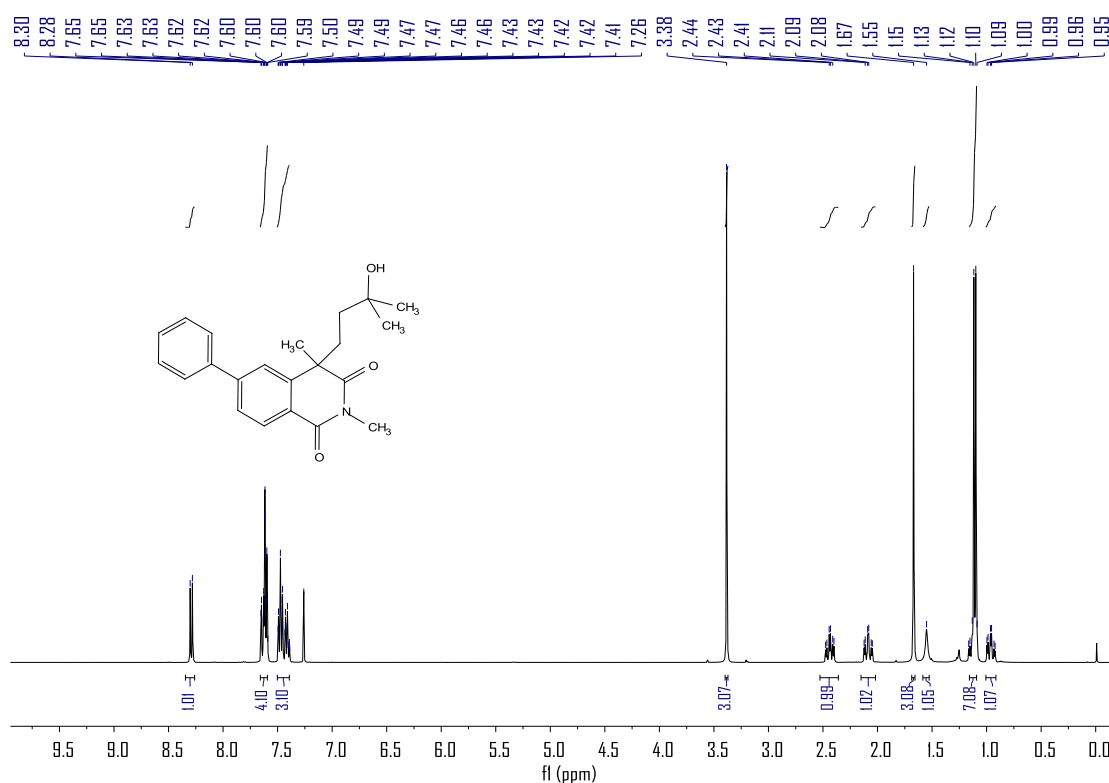

## Supporting Information

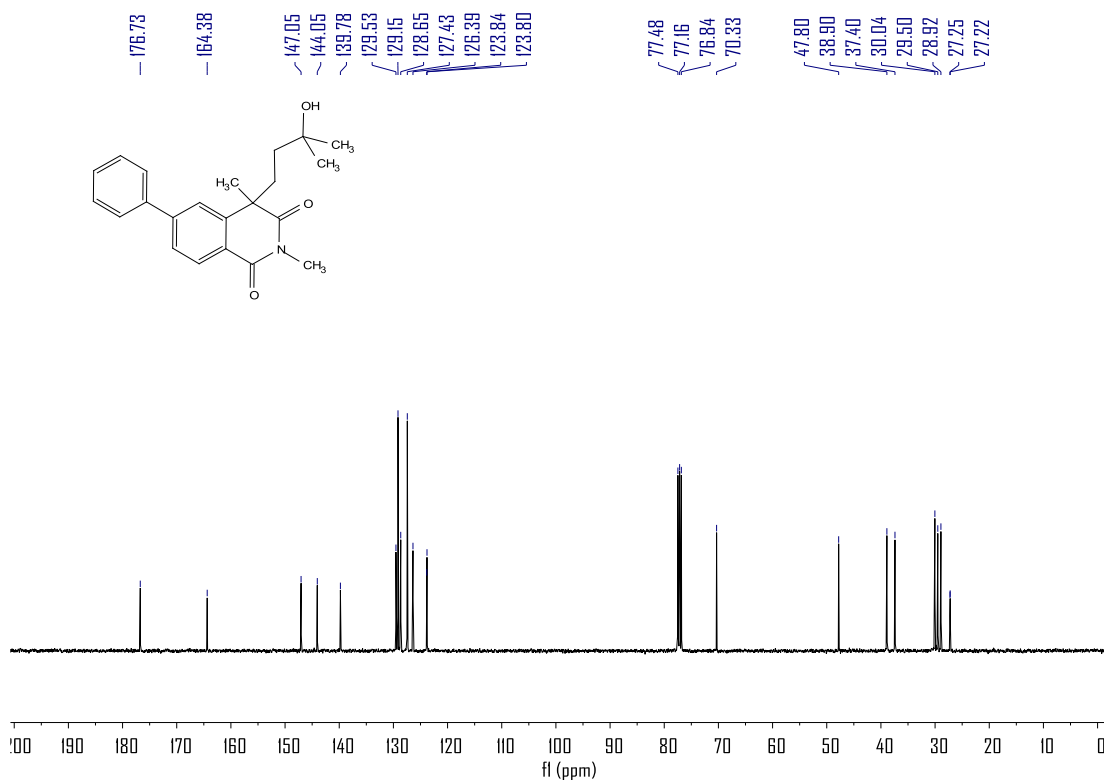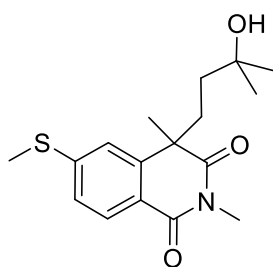

### 4-(3-hydroxy-3-methylbutyl)-2,4-dimethyl-6-(methylthio)isoquinoline-1,3(2H,4H)-dione

Following the general procedure (**3k**, pale-yellow liquid, 45 mg, 70%). The residue was purified by silica gel-column chromatography using PE/EtOAc (2:1) as an eluent.  $^1\text{H NMR}$  (400 MHz, Chloroform-*d*)  $\delta$  8.18 (dd,  $J = 8.4, 1.6$  Hz, 1H), 7.38 – 7.22 (m, 2H), 3.41 (s, 3H), 2.59 (s, 3H), 2.45 (td,  $J = 13.0, 4.4$  Hz, 1H), 2.03 (td,  $J = 13.1, 4.0$  Hz, 1H), 1.72 – 1.54 (m, 4H), 1.16 (d,  $J = 6.2$  Hz, 7H), 0.97 (td,  $J = 13.2, 4.2$  Hz, 1H).  $^{13}\text{C NMR}$  (101 MHz, Chloroform-*d*)  $\delta$  176.49, 164.19, 147.33, 143.97, 129.28, 124.14, 121.49, 121.42, 70.33, 47.67, 38.81, 37.24, 30.00, 29.49, 28.91, 27.19, 27.16, 14.90.

**HRMS** (ESI)  $m/z$ :  $[\text{M} + \text{Na}]^+$  Calcd for  $\text{C}_{17}\text{H}_{23}\text{NNaO}_3\text{S}$ : 344.1291; found: 344.1295.

## Supporting Information

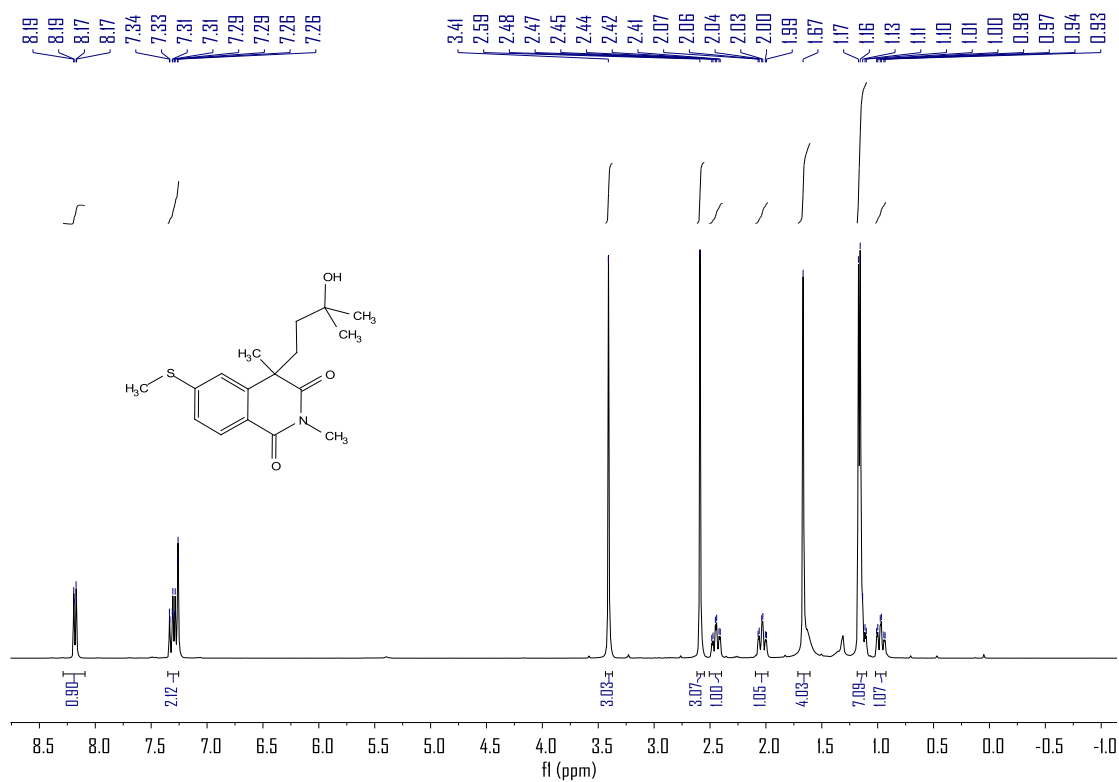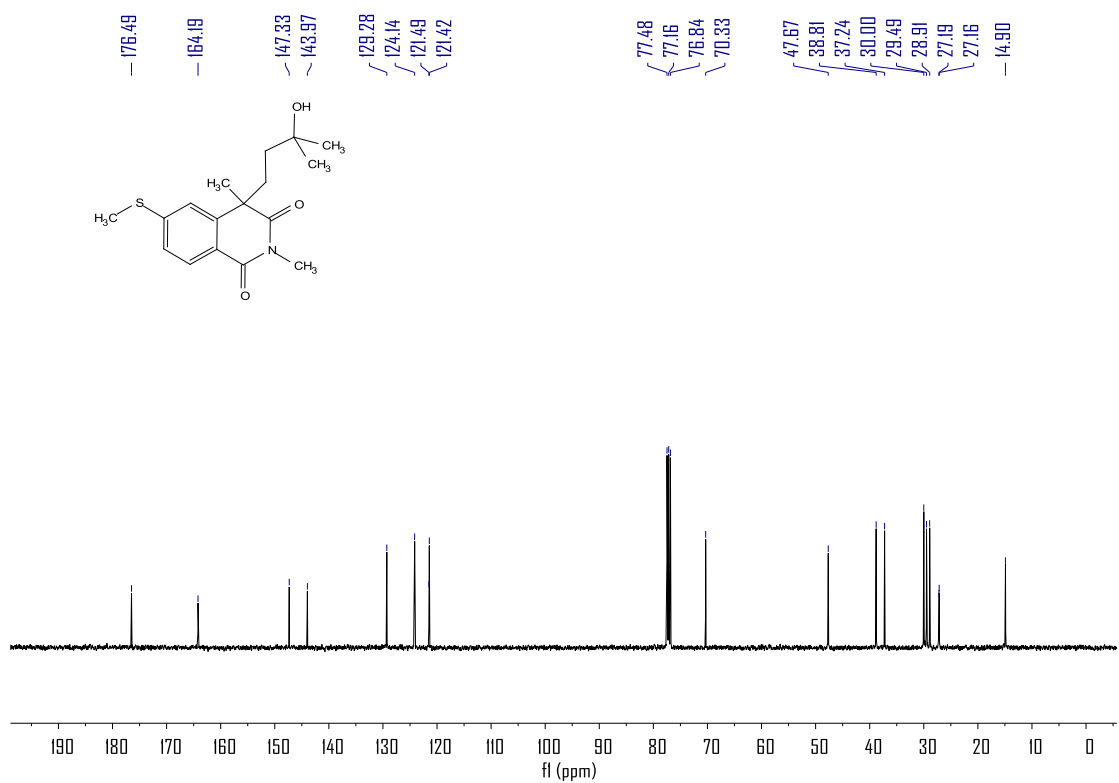

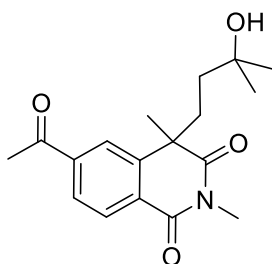

### 6-acetyl-4-(3-hydroxy-3-methylbutyl)-2,4-dimethylisoquinoline-1,3(2H,4H)-dione

Following the general procedure (**3I**, pale-yellow liquid, 24 mg, 37%). The residue was purified by silica gel-column chromatography using PE/EtOAc (1:1) as an eluent.  $^1\text{H NMR}$  (400 MHz, Chloroform-*d*)  $\delta$  8.35 (d,  $J = 8.1$  Hz, 1H), 8.02 (d,  $J = 1.5$  Hz, 1H), 7.96 (dd,  $J = 8.2, 1.6$  Hz, 1H), 3.39 (s, 3H), 2.66 (s, 3H), 2.43 (td,  $J = 13.0, 4.5$  Hz, 1H), 2.06 (td,  $J = 13.1, 4.1$  Hz, 1H), 1.66 (s, 3H), 1.44 (s, 1H), 1.16 – 0.99 (m, 7H), 0.86 (td,  $J = 13.0, 4.1$  Hz, 1H).  $^{13}\text{C NMR}$  (101 MHz, Chloroform-*d*)  $\delta$  197.33, 176.27, 163.81, 144.04, 141.34, 129.63, 128.43, 127.12, 125.14, 70.38, 47.91, 38.87, 37.38, 29.89, 29.54, 29.02, 27.46, 27.07.

**HRMS** (ESI)  $m/z$ :  $[\text{M} + \text{Na}]^+$  Calcd for  $\text{C}_{18}\text{H}_{23}\text{NNaO}_4$ : 340.1519; found: 340.1526.

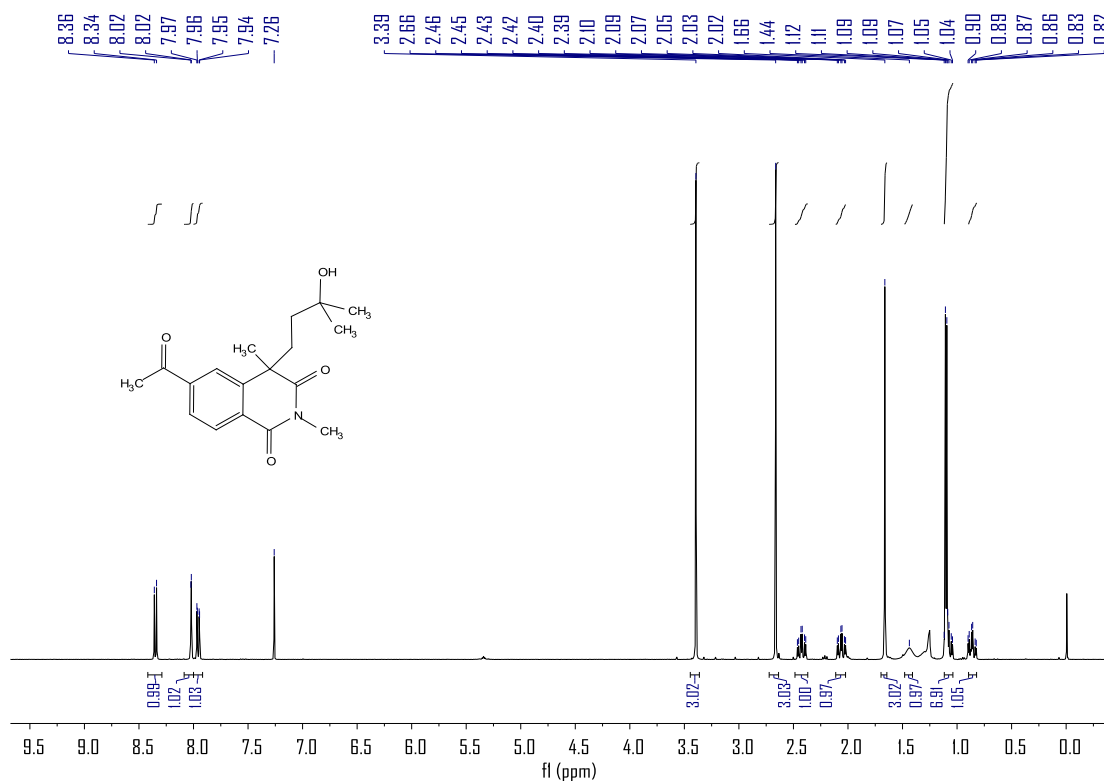



## Supporting Information

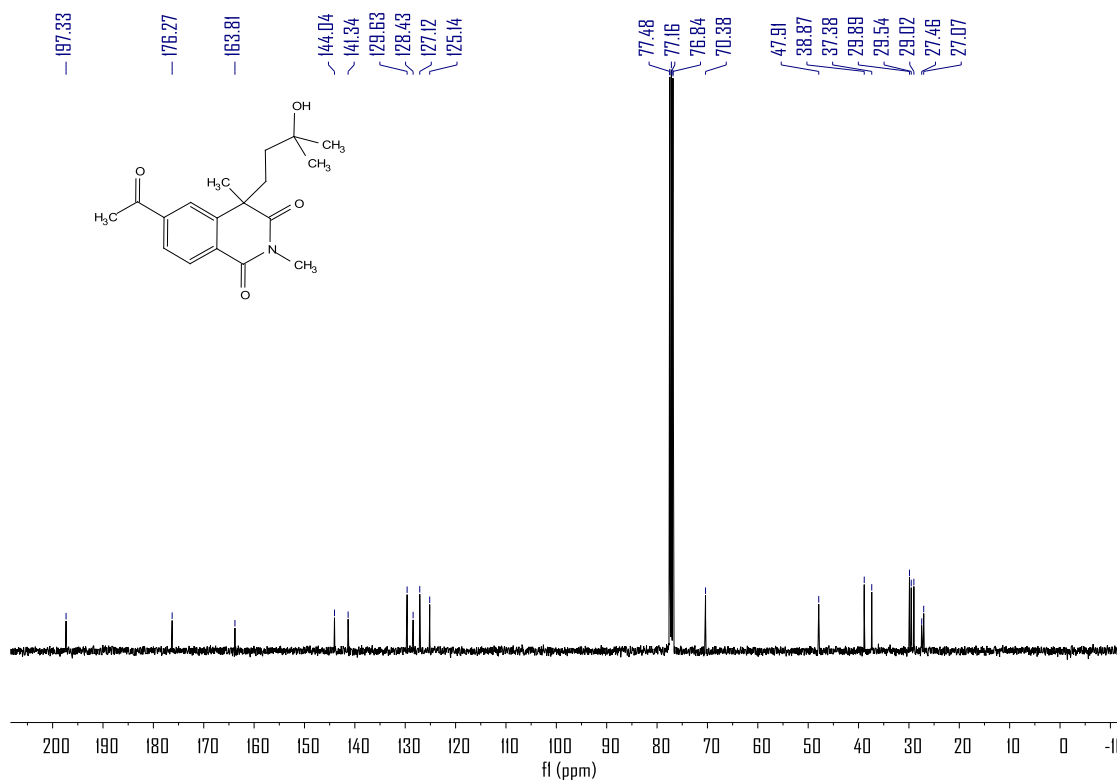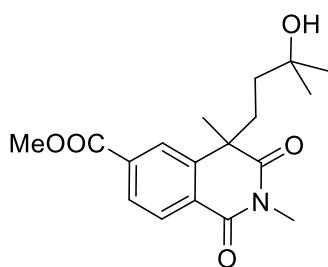

### Methyl-4-(3-hydroxy-3-methylbutyl)-2,4-dimethyl-1,3-dioxo-1,2,3,4-tetrahydroisoquinoline-6-carboxylate

Following the general procedure (**3m**, pale-yellow liquid, 39 mg, 58%). The residue was purified by silica gel-column chromatography using PE/EtOAc (1:1) as an eluent.  $^1\text{H NMR}$  (400 MHz, Chloroform-*d*)  $\delta$  8.30 (d,  $J = 8.1$  Hz, 1H), 8.09 (s, 1H), 8.04 (dd,  $J = 8.2, 1.5$  Hz, 1H), 3.95 (s, 3H), 3.37 (s, 3H), 2.40 (td,  $J = 13.0, 4.4$  Hz, 1H), 2.04 (td,  $J = 13.1, 4.2$  Hz, 1H), 1.65 (s, 3H), 1.55 (s, 1H), 1.14 – 0.98 (m, 7H), 0.85 (td,  $J = 12.9, 4.2$  Hz, 1H).  $^{13}\text{C NMR}$  (101 MHz, Chloroform-*d*)  $\delta$  176.27, 166.08, 163.81, 143.75, 135.19, 129.24, 128.39, 128.17, 126.77, 70.29, 52.79, 52.75, 47.78, 38.86, 37.49, 29.70, 29.41, 28.99, 27.42, 27.39.

**HRMS** (ESI)  $m/z$ :  $[\text{M} + \text{Na}]^+$  Calcd for  $\text{C}_{18}\text{H}_{23}\text{NNaO}_5$ : 356.1468; found: 356.1473.

## Supporting Information

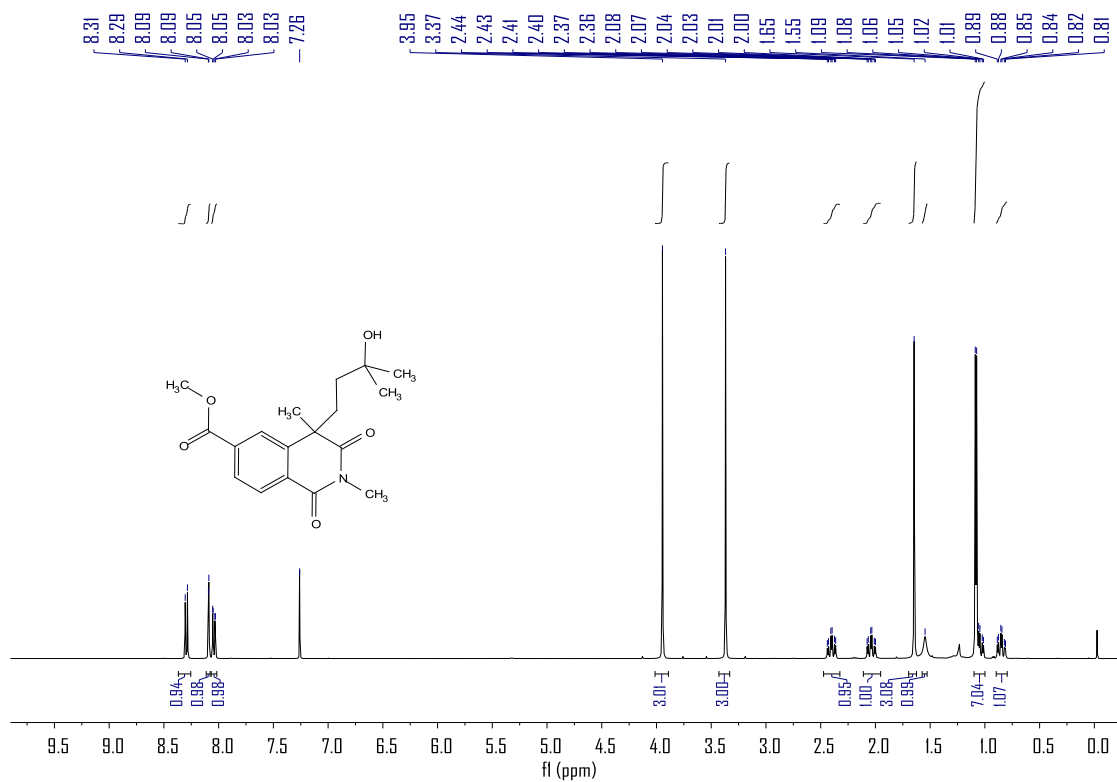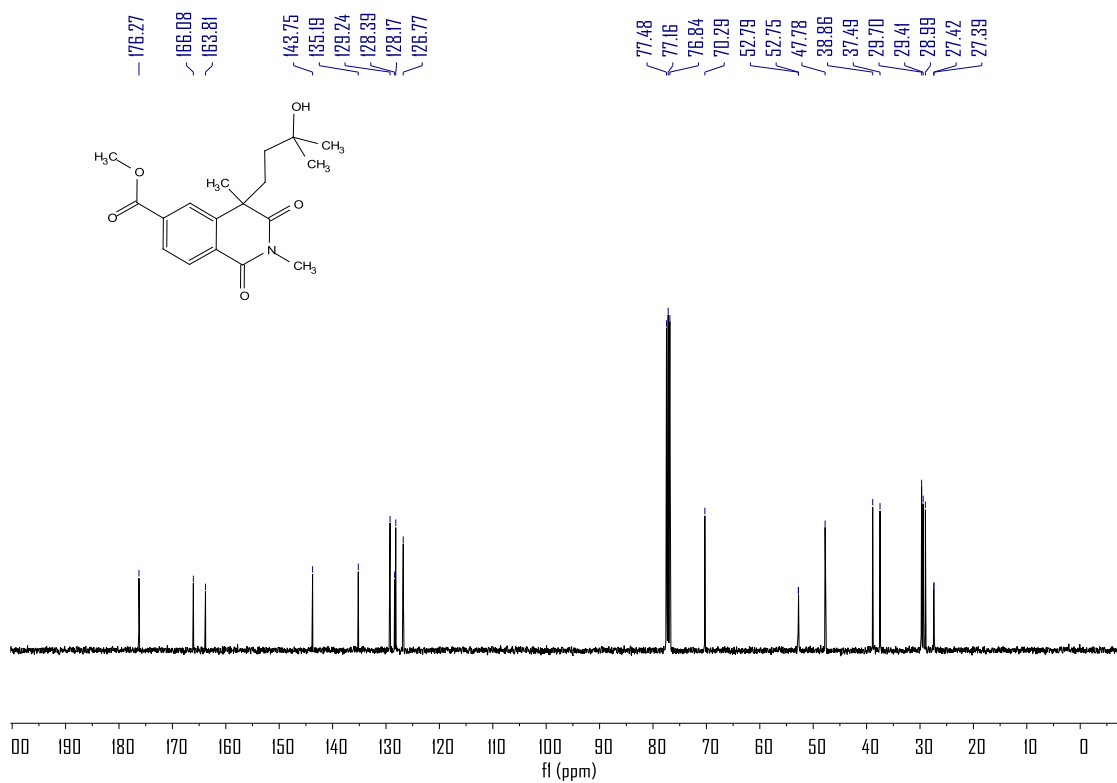

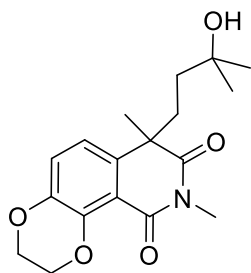

**7-(3-hydroxy-3-methylbutyl)-7,9-dimethyl-2,3-dihydro-[1,4]dioxino[2,3-h]isoquinoline-8,10(7H,9H)-dione**

Following the general procedure (**3n**, pale-yellow liquid, 34 mg, 51%). The residue was purified by silica gel-column chromatography using PE/EtOAc (1:1) as an eluent.  $^1\text{H NMR}$  (400 MHz, Chloroform-*d*)  $\delta$  7.10 (d,  $J = 8.6$  Hz, 1H), 6.88 (d,  $J = 8.6$  Hz, 1H), 4.44 – 4.38 (m, 2H), 4.29 (dd,  $J = 5.6, 2.8$  Hz, 2H), 3.29 (s, 3H), 2.30 (td,  $J = 12.9, 4.6$  Hz, 1H), 1.89 (td,  $J = 12.9, 4.3$  Hz, 1H), 1.66 (s, 2H), 1.55 (s, 3H), 1.10 – 1.00 (m, 7H), 0.94 (td,  $J = 12.9, 4.2$  Hz, 1H).  $^{13}\text{C NMR}$  (101 MHz, Chloroform-*d*)  $\delta$  176.38, 162.57, 145.10, 142.68, 137.62, 122.99, 117.53, 114.55, 70.33, 64.84, 63.70, 47.10, 38.79, 37.62, 29.99, 29.41, 28.98, 27.06.

**HRMS (ESI)  $m/z$ :  $[\text{M} + \text{Na}]^+$  Calcd for  $\text{C}_{18}\text{H}_{23}\text{NNaO}_5$ : 356.1468; found: 356.1477.**

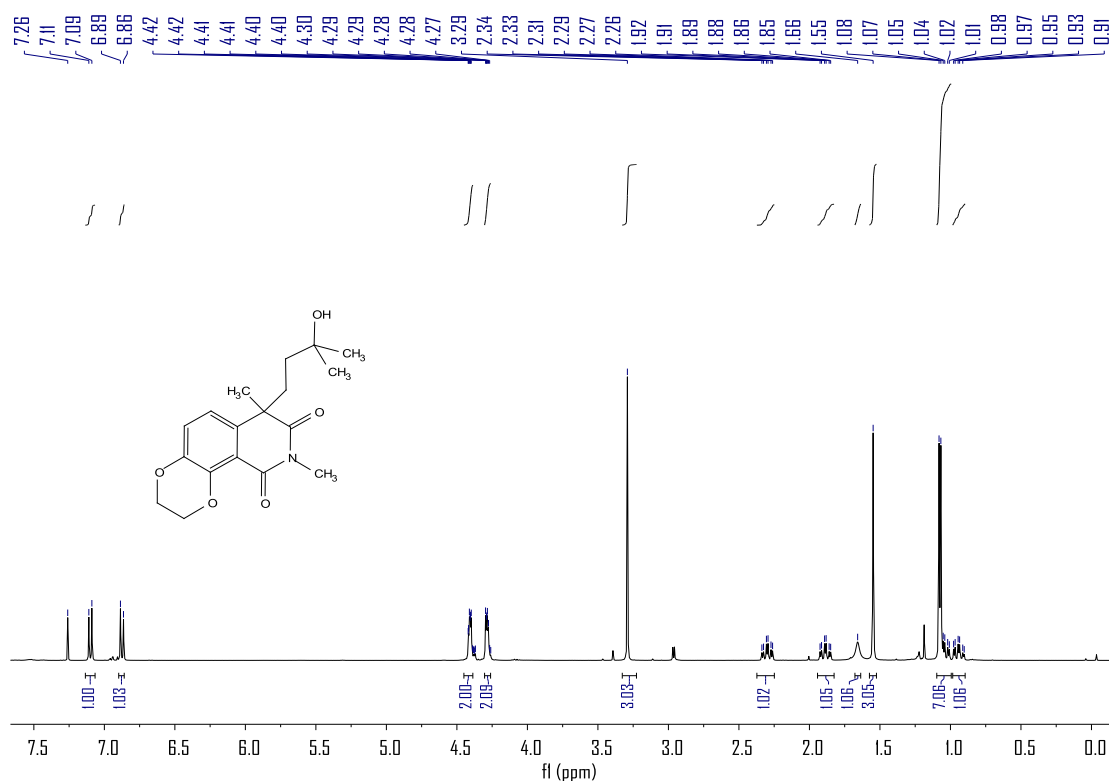

## Supporting Information

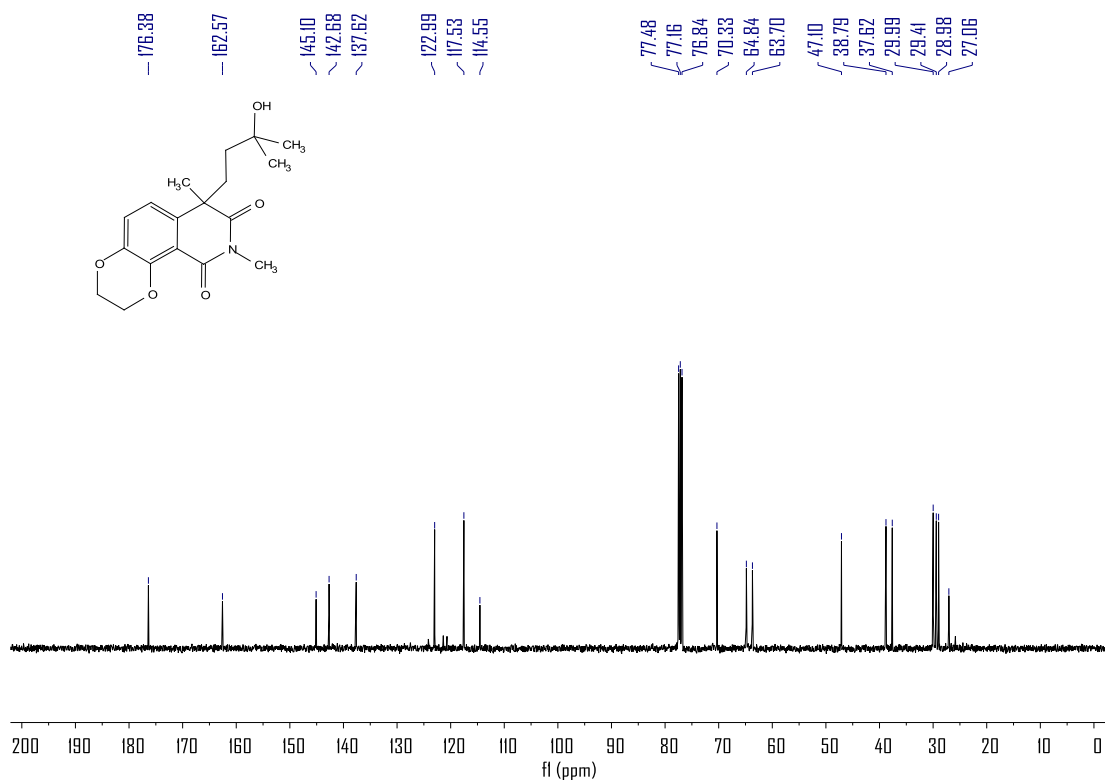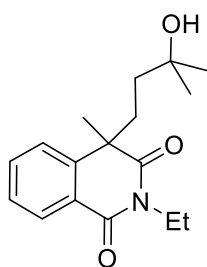

### 2-ethyl-4-(3-hydroxy-3-methylbutyl)-4-methylisoquinoline-1,3(2H,4H)-dione

Following the general procedure (**30**, pale-yellow liquid, 42 mg, 72%). The residue was purified by silica gel-column chromatography using PE/EtOAc (2:1) as an eluent.  $^1\text{H}$  NMR (400 MHz, Chloroform-*d*)  $\delta$  8.21 (dd,  $J = 8.1, 1.5$  Hz, 1H), 7.69 – 7.56 (m, 1H), 7.47 – 7.35 (m, 2H), 4.03 (q,  $J = 7.0$  Hz, 2H), 2.36 (td,  $J = 13.0, 4.4$  Hz, 1H), 1.97 (td,  $J = 13.0, 4.1$  Hz, 1H), 1.59 (s, 3H), 1.19 (t,  $J = 7.0$  Hz, 3H), 1.07 (d,  $J = 6.6$  Hz, 7H), 0.87 (td,  $J = 12.9, 4.1$  Hz, 1H).  $^{13}\text{C}$  NMR (101 MHz, Chloroform-*d*)  $\delta$  176.20, 163.99, 143.55, 134.15, 128.89, 127.38, 125.19, 125.14, 70.30, 47.32, 38.71, 37.36, 35.63, 29.81, 29.37, 28.91, 13.33.

HRMS (ESI)  $m/z$ :  $[\text{M} + \text{Na}]^+$  Calcd for  $\text{C}_{17}\text{H}_{23}\text{NNaO}_3$ : 312.1570; found: 312.1573.

## Supporting Information

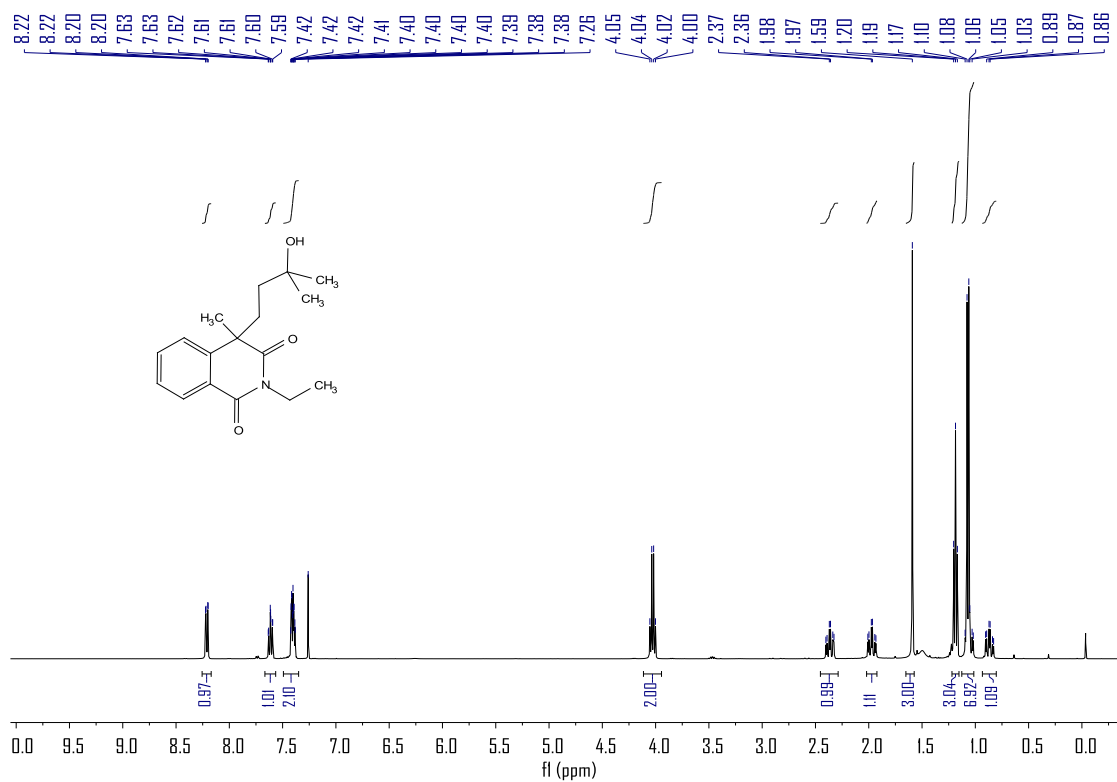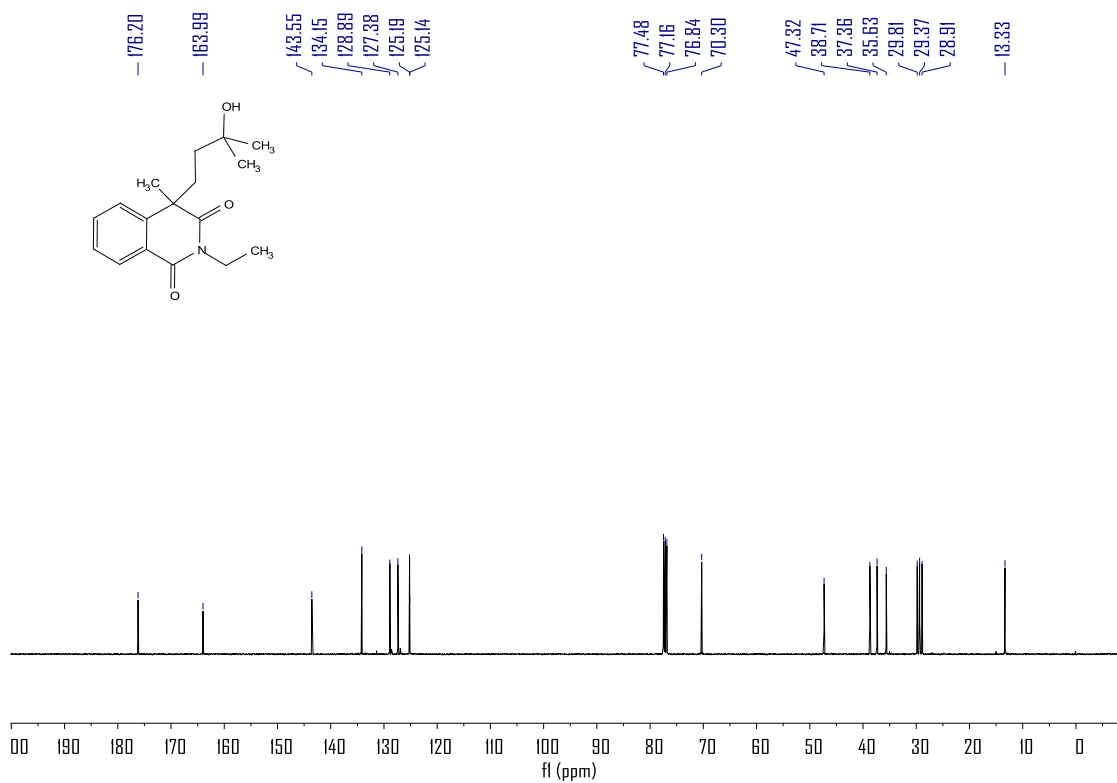

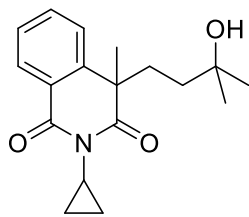

**2-cyclopropyl-4-(3-hydroxy-3-methylbutyl)-4-methylisoquinoline-1,3(2H,4H)-dione**

Following the general procedure (**3p**, pale-yellow liquid, 21 mg, 35%). The residue was purified by silica gel-column chromatography using PE/EtOAc (2:1) as an eluent.  $^1\text{H NMR}$  (400 MHz, Chloroform-*d*)  $\delta$  8.22 (dd,  $J = 7.9, 1.4$  Hz, 1H), 7.67 – 7.57 (m, 1H), 7.47 – 7.33 (m, 2H), 2.74 (tt,  $J = 7.1, 4.1$  Hz, 1H), 2.37 (td,  $J = 13.0, 4.4$  Hz, 1H), 1.99 (dd,  $J = 13.0, 4.2$  Hz, 1H), 1.58 (s, 3H), 1.11 (d,  $J = 7.2$  Hz, 9H), 0.92 (td,  $J = 13.0, 4.2$  Hz, 1H), 0.76 – 0.56 (m, 2H).  $^{13}\text{C NMR}$  (101 MHz, Chloroform-*d*)  $\delta$  177.66, 165.39, 143.57, 134.17, 128.97, 127.47, 125.62, 125.23, 70.45, 47.90, 38.91, 36.79, 29.59, 28.99, 24.65, 8.67, 8.59.

**HRMS** (ESI)  $m/z$ :  $[\text{M} + \text{Na}]^+$  Calcd for  $\text{C}_{18}\text{H}_{23}\text{NNaO}_3$ : 324.1570; found: 324.1573.

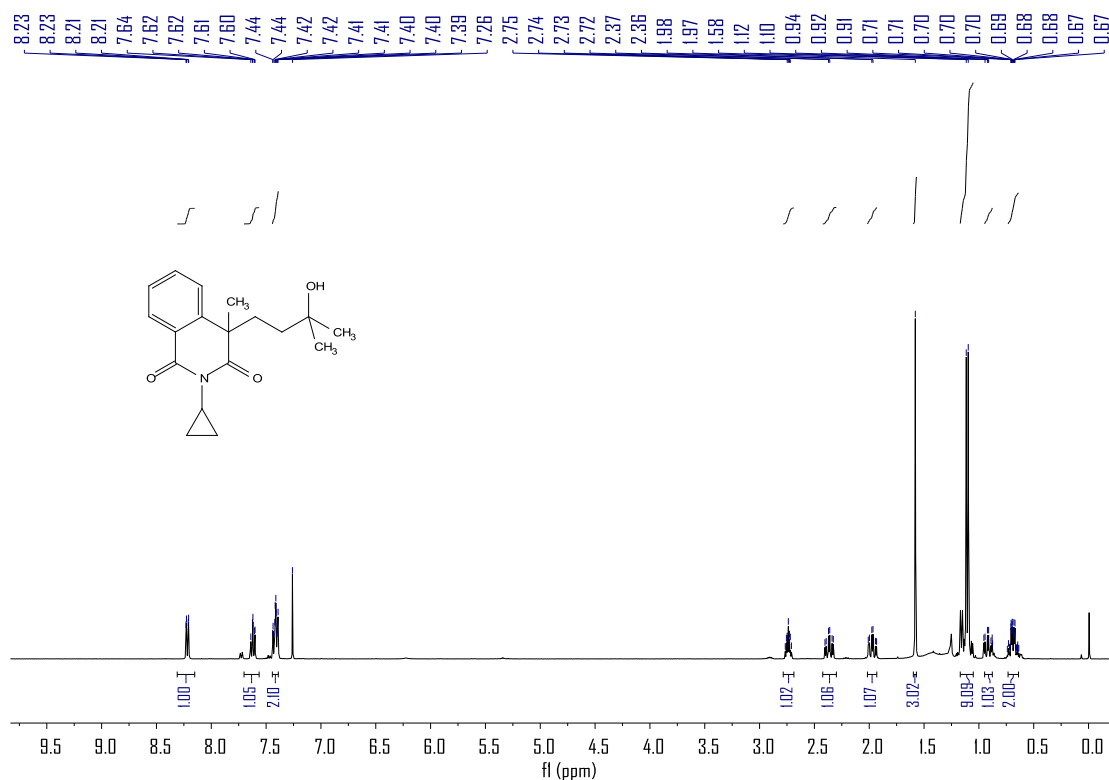

## Supporting Information

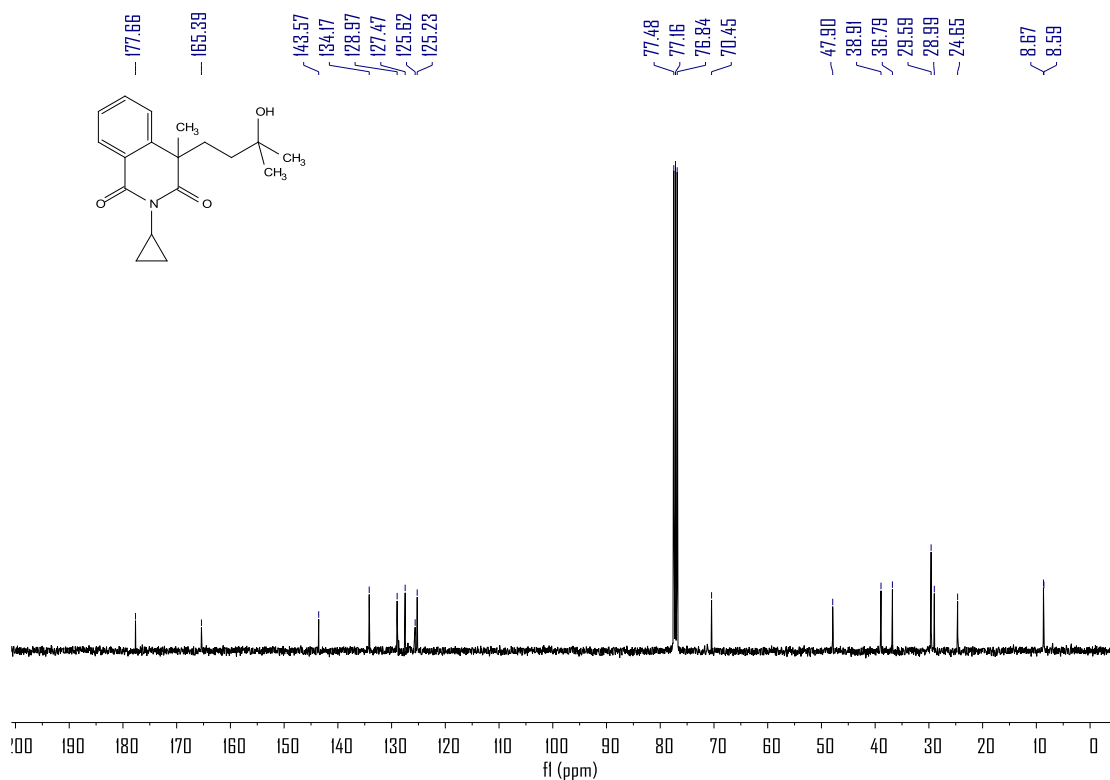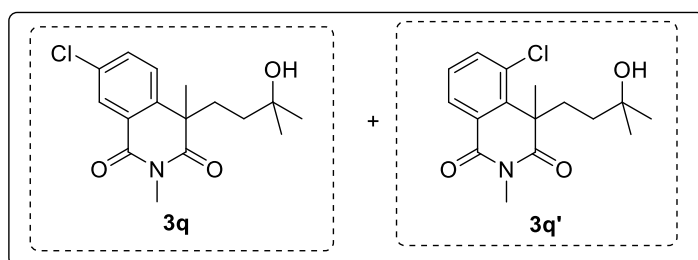

**7-chloro-4-(3-hydroxy-3-methylbutyl)-2,4-dimethylisoquinoline-1,3(2H,4H)-dione**  
and

**5-chloro-4-(3-hydroxy-3-methylbutyl)-2,4-dimethylisoquinoline-1,3(2H,4H)-dione**

Following the general procedure (**3q**:**3q'** = **11**:**1**, pale-yellow liquid, 53 mg, 85%). The residue was purified by silica gel-column chromatography using PE/EtOAc (2:1) as an eluent. <sup>1</sup>H NMR (400 MHz, Chloroform-*d*) δ 8.19 (d, *J* = 2.2 Hz, 1H), 7.58 (dd, *J* = 8.5, 2.4 Hz, 1H), 7.37 (d, *J* = 8.5 Hz, 1H), 3.35 (s, 3H), 2.38 (td, *J* = 13.0, 4.5 Hz, 1H), 2.05 – 1.91 (m, 1H), 1.59 (s, 3H), 1.08 (d, *J* = 7.3 Hz, 6H), 1.09 – 1.02 (m, 1H), 0.84 (td, *J* = 13.0, 4.0 Hz, 1H). <sup>13</sup>C NMR (101 MHz, Chloroform-*d*) δ 176.24, 163.39, 141.84, 134.36, 133.73, 128.59, 127.01, 126.53, 70.27, 47.39, 38.72, 37.22, 29.96, 29.51, 28.94, 27.42.

**HRMS** (ESI) *m/z*: [M + Na]<sup>+</sup> Calcd for C<sub>16</sub>H<sub>20</sub>ClNNaO<sub>3</sub>: 332.1024; found: 332.1031.

## Supporting Information

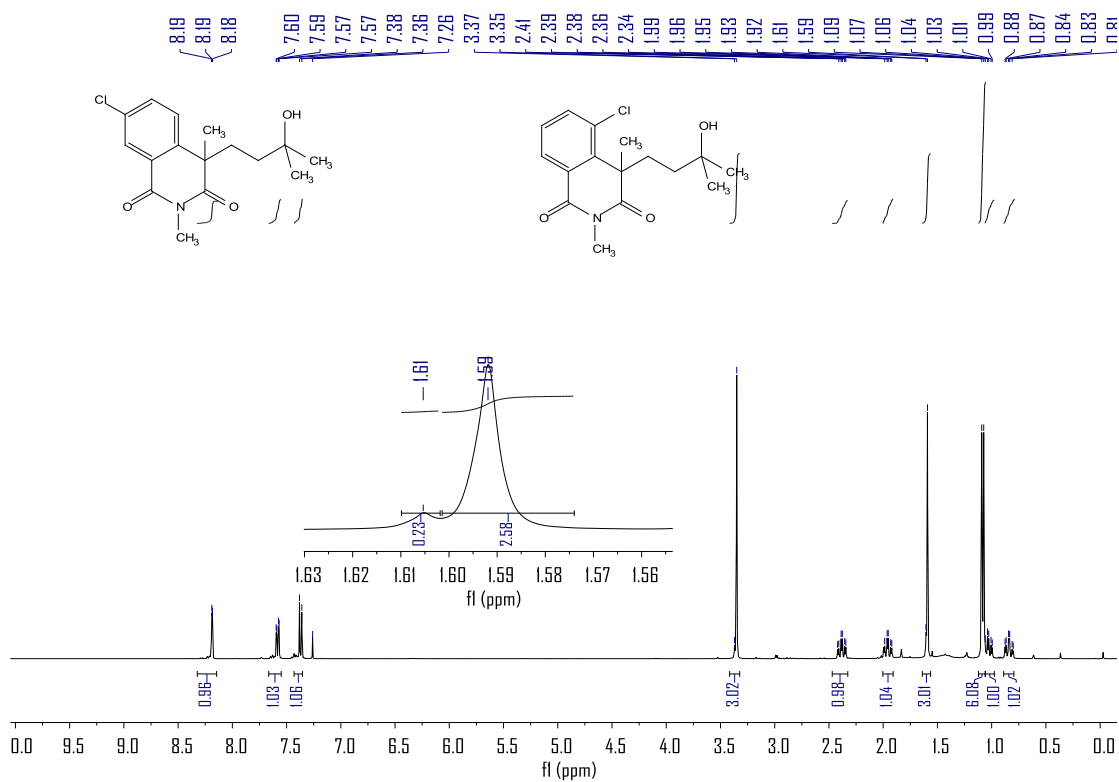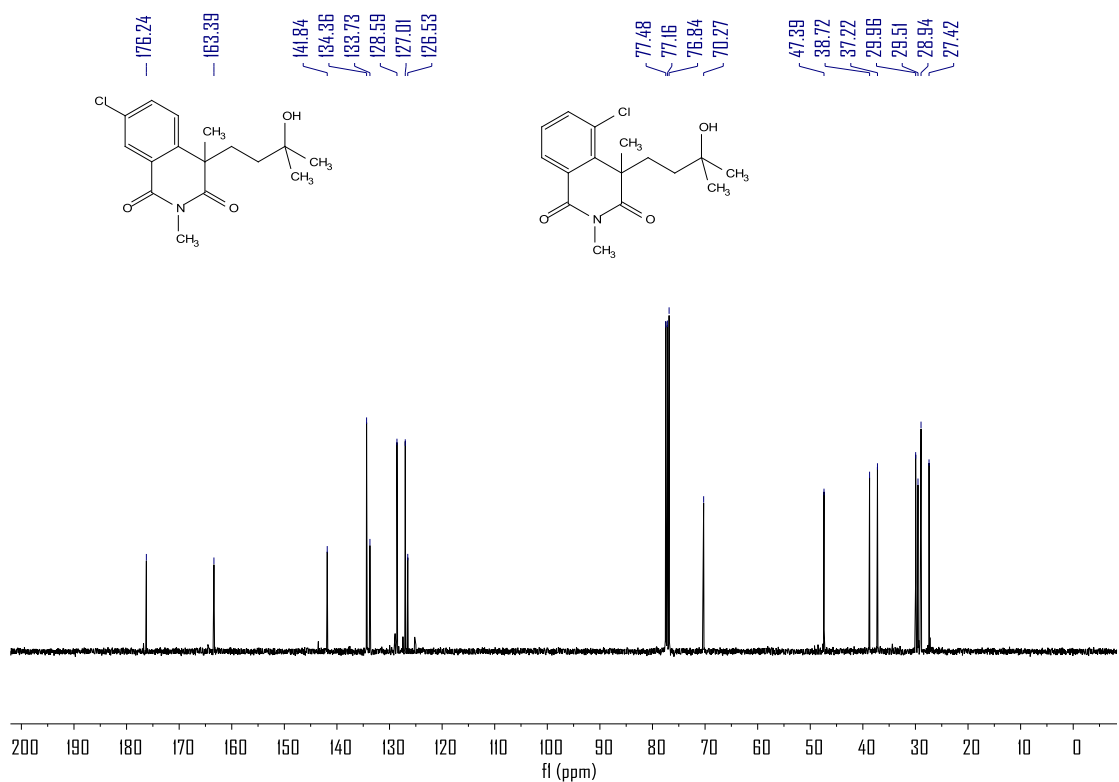



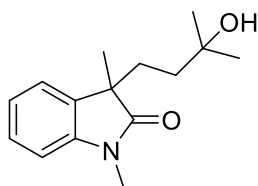

### 3-(3-hydroxy-3-methylbutyl)-1,3-dimethylindolin-2-one

Following the general procedure (**4a**, pale-yellow liquid, 47 mg, 95%). The residue was purified by silica gel-column chromatography using PE/EtOAc (2:1) as an eluent.  $^1\text{H}$  NMR (400 MHz, Chloroform-*d*)  $\delta$  7.27 (tdd,  $J = 7.7, 2.9, 1.4$  Hz, 1H), 7.22 – 7.15 (m, 1H), 7.07 (td,  $J = 7.5, 2.5$  Hz, 1H), 6.85 (dd,  $J = 7.8, 2.6$  Hz, 1H), 3.21 (d,  $J = 2.7$  Hz, 3H), 2.00 (tdd,  $J = 13.0, 4.7, 2.6$  Hz, 1H), 1.85 (tt,  $J = 13.0, 3.4$  Hz, 1H), 1.68 (s, 1H), 1.37 (d,  $J = 2.6$  Hz, 3H), 1.23 – 1.07 (m, 7H), 0.98 (tt,  $J = 13.0, 3.4$  Hz, 1H).  $^{13}\text{C}$  NMR (101 MHz, Chloroform-*d*)  $\delta$  180.71, 143.30, 134.02, 127.75, 122.63, 122.49, 108.02, 70.31, 48.08, 38.05, 32.96, 29.18, 29.00, 26.18, 24.03.

HRMS (ESI)  $m/z$ :  $[\text{M} + \text{Na}]^+$  Calcd for  $\text{C}_{15}\text{H}_{21}\text{NNaO}_2$ : 270.1465; found: 270.1471.

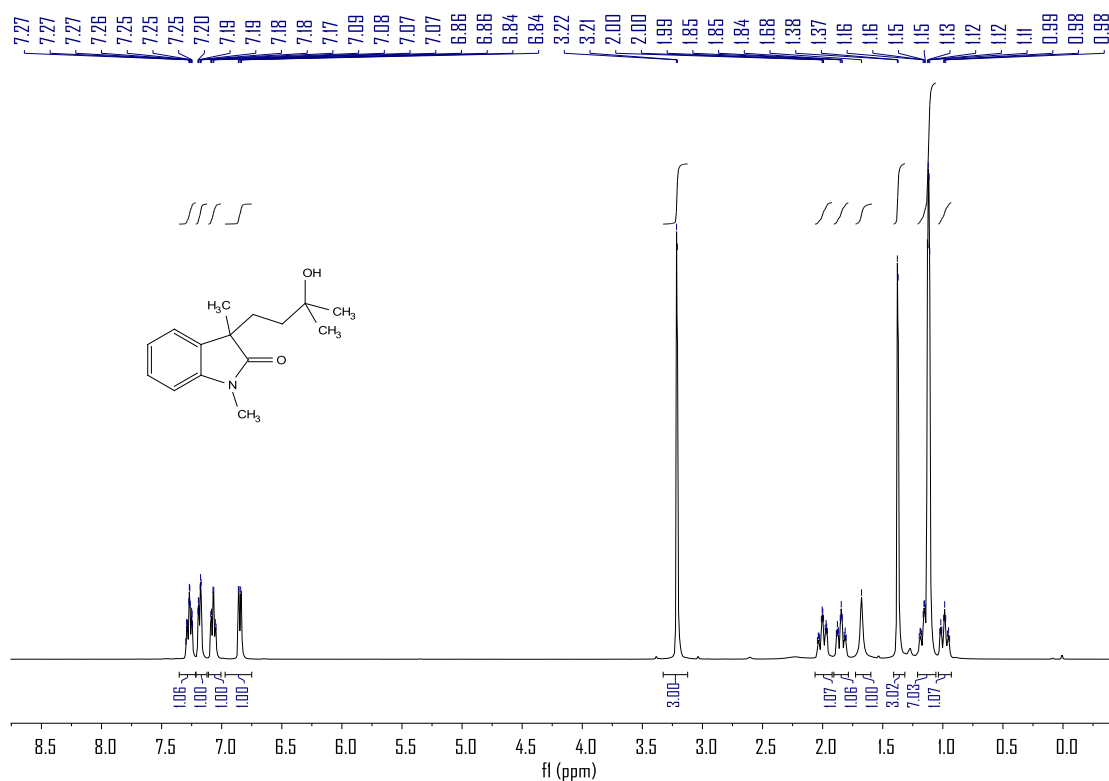

## Supporting Information

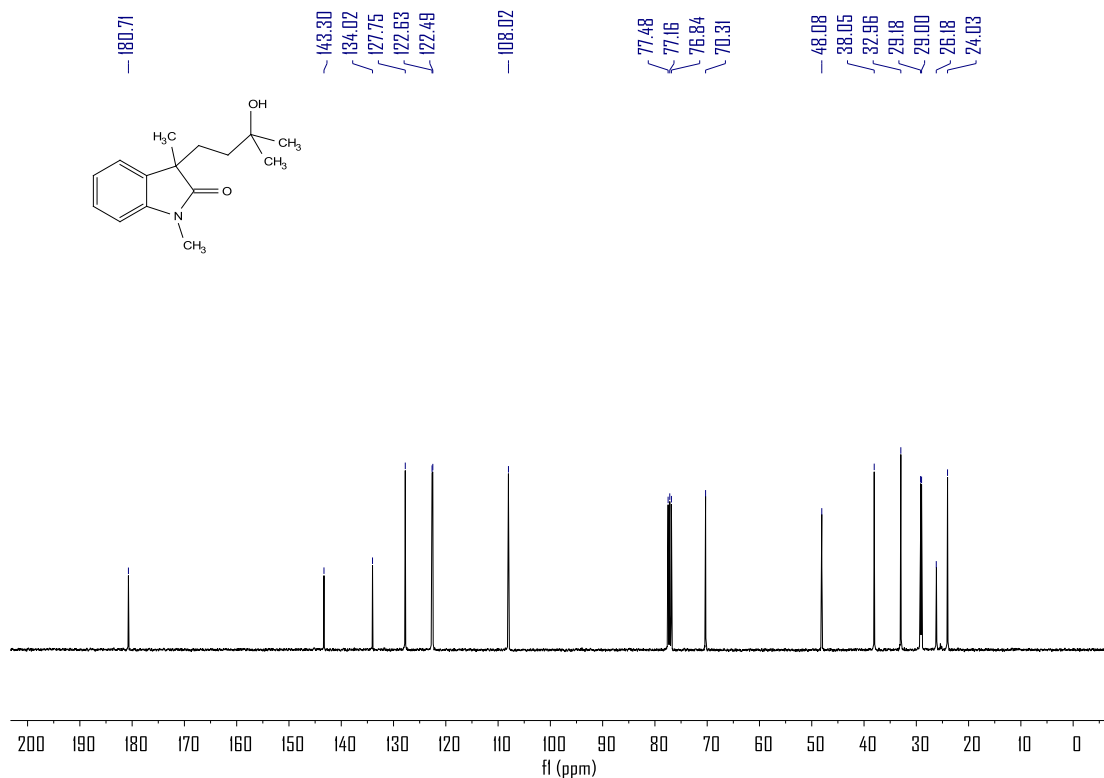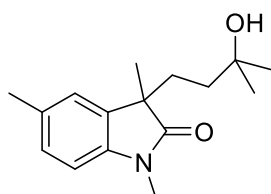

### 3-(3-hydroxy-3-methylbutyl)-1,3,5-trimethylindolin-2-one

Following the general procedure (**4b**, pale-yellow liquid, 47 mg, 90%). The residue was purified by silica gel-column chromatography using PE/EtOAc (2:1) as an eluent.  $^1\text{H NMR}$  (400 MHz, Chloroform-*d*)  $\delta$  7.12 – 7.01 (m, 1H), 6.97 (d,  $J = 1.6$  Hz, 1H), 6.71 (d,  $J = 7.8$  Hz, 1H), 3.17 (s, 3H), 2.33 (s, 3H), 1.97 (td,  $J = 12.9, 4.6$  Hz, 1H), 1.80 (td,  $J = 13.0, 4.2$  Hz, 1H), 1.64 (s, 1H), 1.34 (s, 3H), 1.11 (d,  $J = 5.9$  Hz, 7H), 0.99 (td,  $J = 13.0, 4.2$  Hz, 1H).  $^{13}\text{C NMR}$  (101 MHz, Chloroform-*d*)  $\delta$  180.70, 141.00, 134.12, 132.16, 128.03, 123.38, 107.77, 70.49, 48.19, 38.14, 33.02, 29.31, 29.02, 26.24, 24.14, 21.26.

**HRMS** (ESI)  $m/z$ :  $[\text{M} + \text{Na}]^+$  Calcd for  $\text{C}_{16}\text{H}_{23}\text{NNaO}_2$ : 284.1621; found: 284.1626.

# Supporting Information

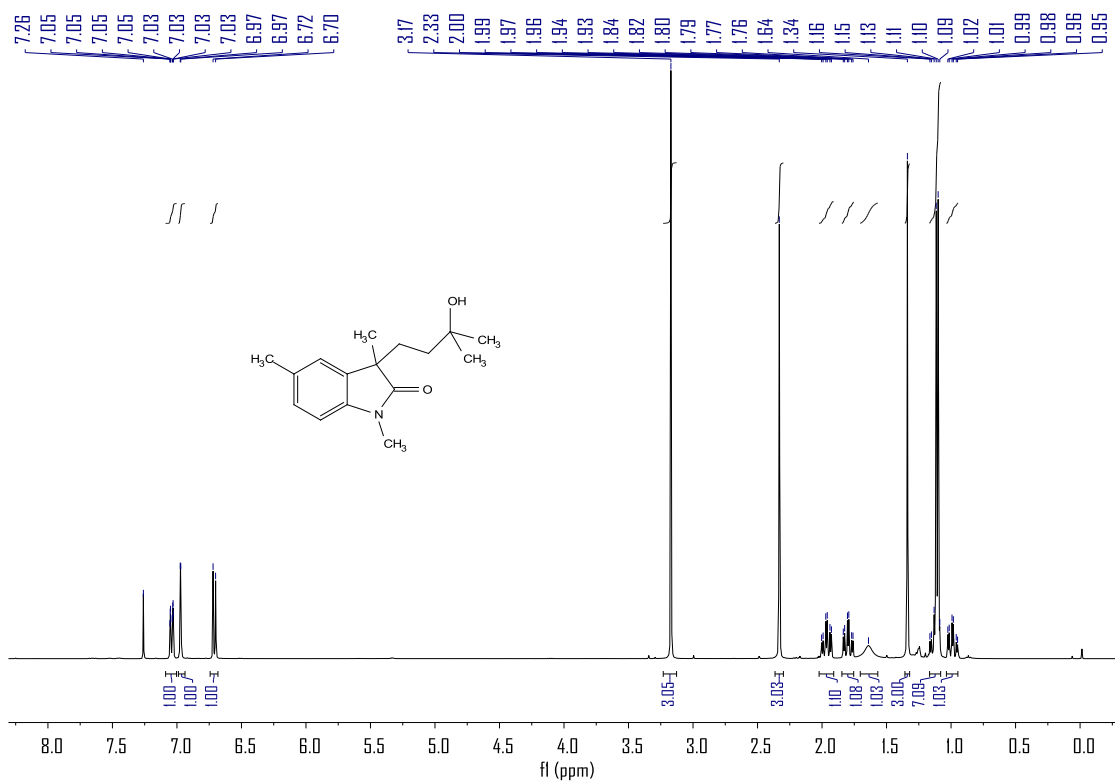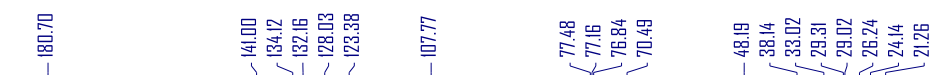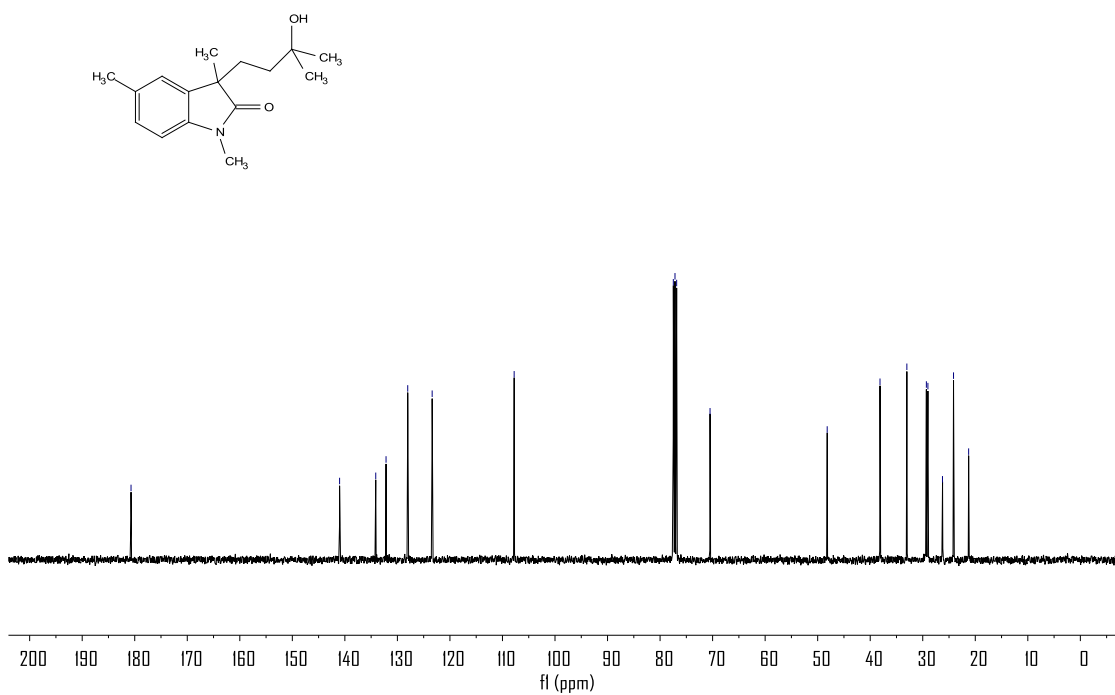

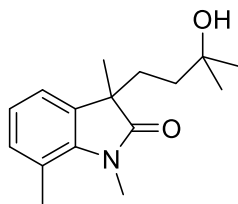

### 3-(3-hydroxy-3-methylbutyl)-1,3,7-trimethylindolin-2-one

Following the general procedure (**4c**, pale-yellow liquid, 35 mg, 67%). The residue was purified by silica gel-column chromatography using PE/EtOAc (2:1) as an eluent.  $^1\text{H NMR}$  (400 MHz, Chloroform-*d*)  $\delta$  7.06 – 6.85 (m, 3H), 3.48 (s, 3H), 2.58 (s, 3H), 1.98 (td,  $J = 12.9, 4.6$  Hz, 1H), 1.78 (td,  $J = 13.0, 4.1$  Hz, 1H), 1.55 (s, 1H), 1.33 (s, 3H), 1.11 (d,  $J = 3.1$  Hz, 7H), 0.95 (td,  $J = 13.0, 4.1$  Hz, 1H).  $^{13}\text{C NMR}$  (101 MHz, Chloroform-*d*)  $\delta$  181.45, 141.15, 134.72, 131.55, 122.61, 120.44, 119.68, 70.54, 47.43, 38.17, 33.33, 29.57, 29.30, 29.02, 24.60, 19.17.

**HRMS** (ESI)  $m/z$ :  $[\text{M} + \text{Na}]^+$  Calcd for  $\text{C}_{16}\text{H}_{23}\text{NNaO}_2$ : 284.1621; found: 284.1628.

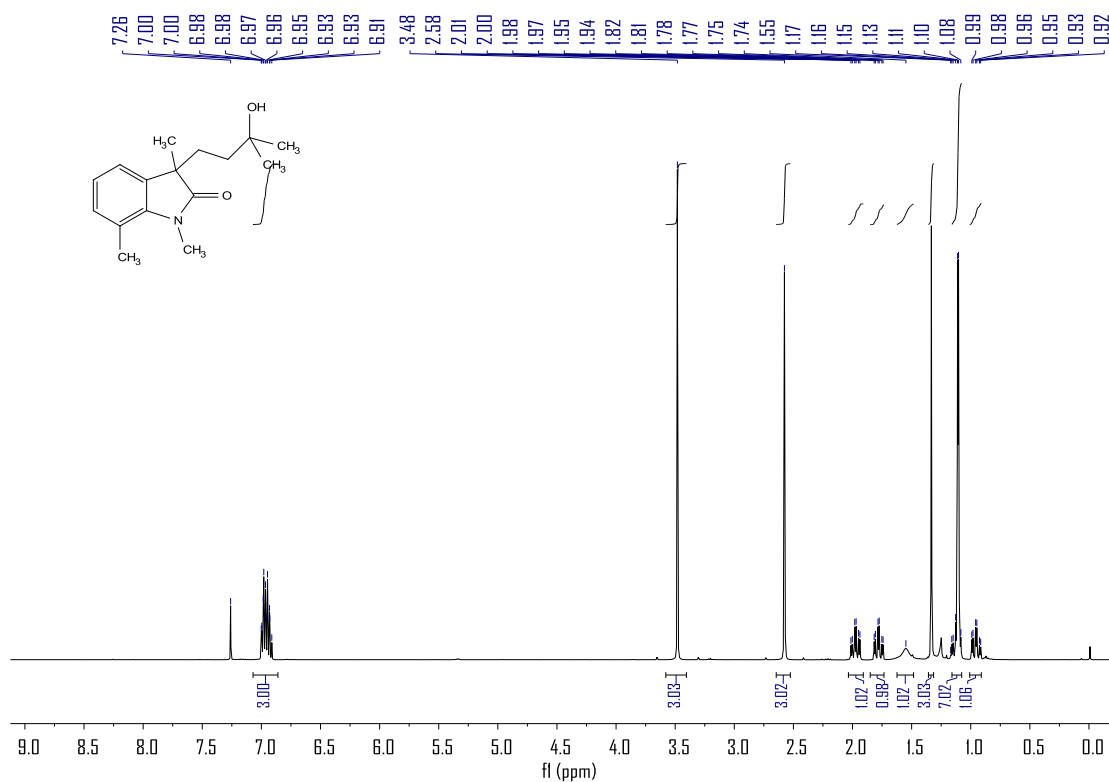

## Supporting Information

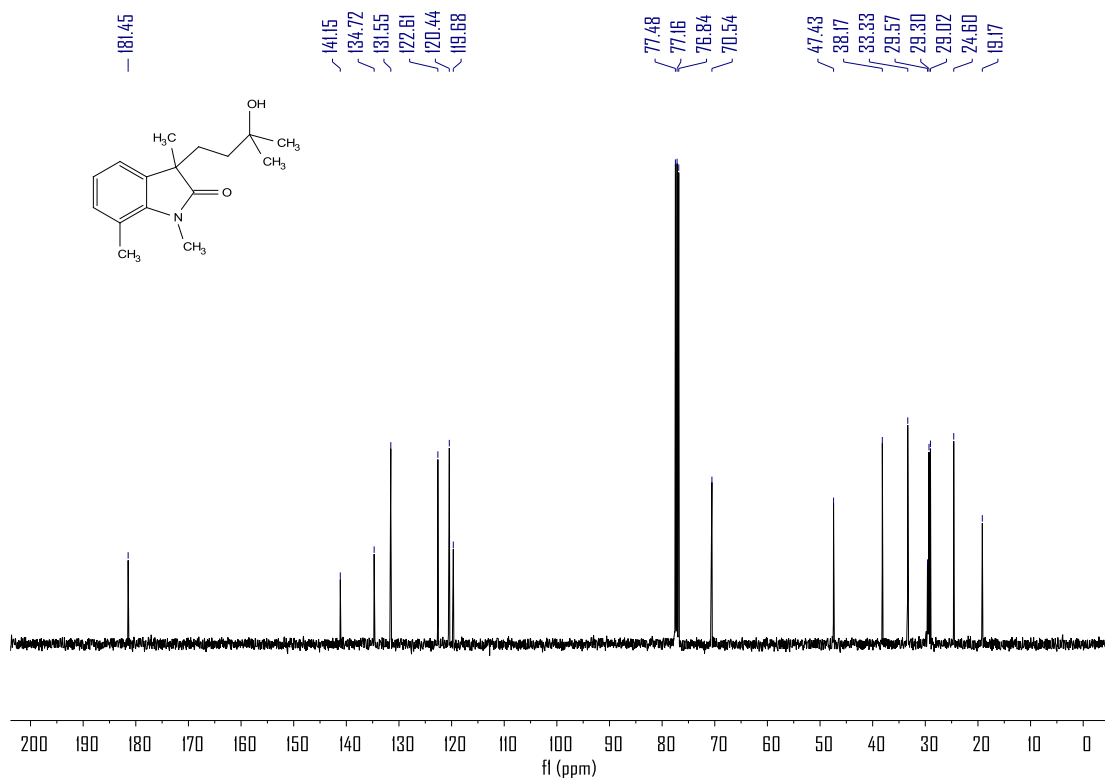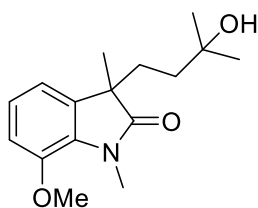

### 3-(3-hydroxy-3-methylbutyl)-7-methoxy-1,3-dimethylindolin-2-one

Following the general procedure (**4d**, pale-yellow liquid, 39 mg, 70%). The residue was purified by silica gel-column chromatography using PE/EtOAc (2:1) as an eluent.  $^1\text{H}$  NMR (400 MHz, Chloroform-*d*)  $\delta$  7.10 – 6.92 (m, 1H), 6.81 (dd,  $J = 15.7, 7.9$  Hz, 2H), 3.87 (s, 3H), 3.48 (s, 3H), 1.98 (td,  $J = 12.9, 4.6$  Hz, 1H), 1.79 (td,  $J = 13.0, 4.1$  Hz, 1H), 1.57 (s, 1H), 1.35 (s, 3H), 1.19 – 1.09 (m, 7H), 0.96 (td,  $J = 13.0, 4.1$  Hz, 1H).  $^{13}\text{C}$  NMR (101 MHz, Chloroform-*d*)  $\delta$  180.94, 145.43, 135.79, 131.18, 123.24, 115.29, 111.71, 70.59, 56.01, 48.24, 38.20, 33.24, 29.52, 29.35, 29.01, 24.41.

**HRMS** (ESI)  $m/z$ :  $[\text{M} + \text{Na}]^+$  Calcd for  $\text{C}_{16}\text{H}_{23}\text{NNaO}_3$ : 300.1570; found: 300.1577.

## Supporting Information

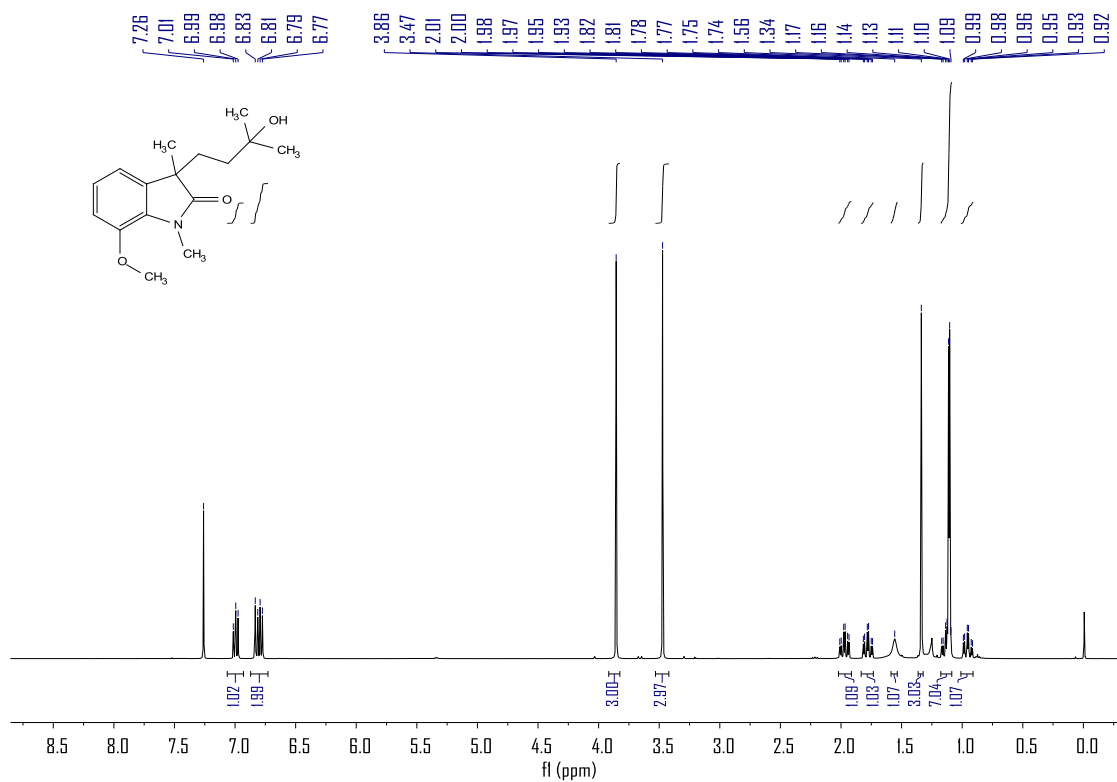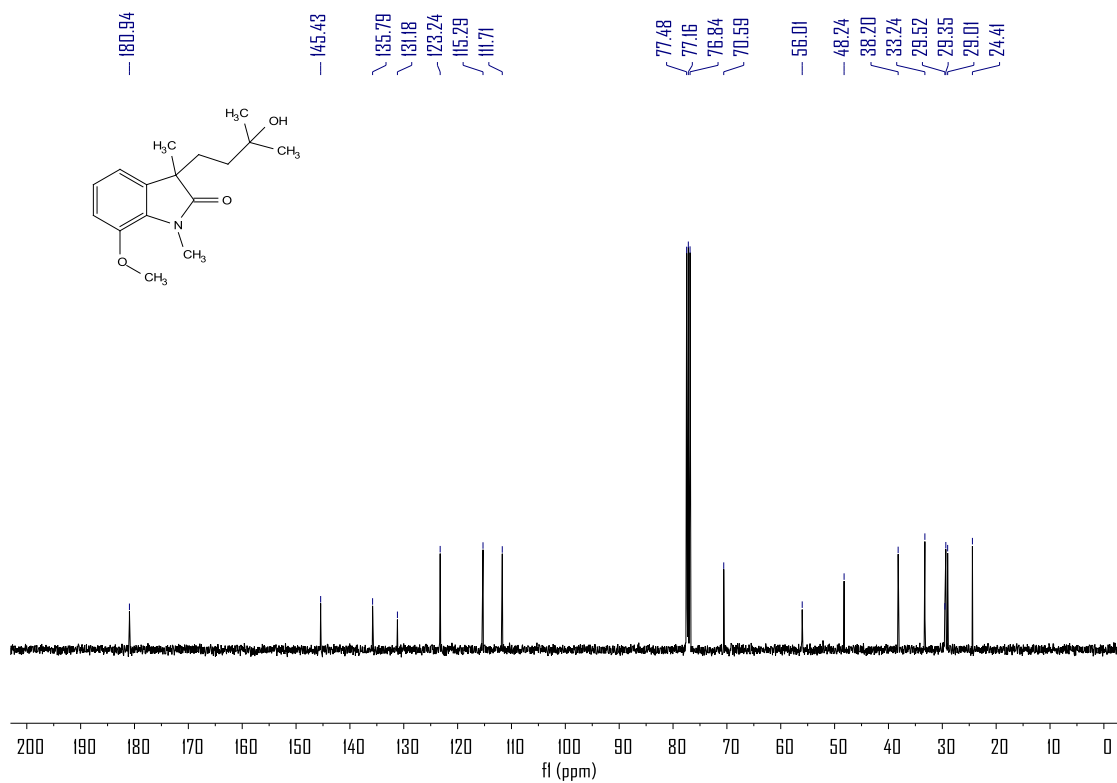

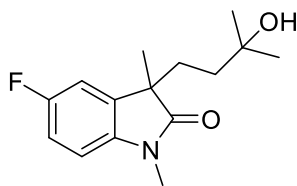

### 5-fluoro-3-(3-hydroxy-3-methylbutyl)-1,3-dimethylindolin-2-one

Following the general procedure (**4e**, pale-yellow liquid, 44 mg, 84%). The residue was purified by silica gel-column chromatography using PE/EtOAc (2:1) as an eluent.  $^1\text{H NMR}$  (400 MHz, Chloroform-*d*)  $\delta$  7.00 – 6.86 (m, 2H), 6.74 (dd,  $J = 8.4, 4.1$  Hz, 1H), 3.18 (s, 3H), 1.99 (td,  $J = 13.0, 4.5$  Hz, 1H), 1.80 (td,  $J = 13.0, 4.1$  Hz, 1H), 1.66 (s, 1H), 1.35 (s, 3H), 1.11 (d,  $J = 4.4$  Hz, 7H), 0.96 (td,  $J = 13.0, 4.1$  Hz, 1H).  $^{13}\text{C NMR}$  (101 MHz, Chloroform-*d*)  $\delta$  180.38, 159.58 (d,  $J = 240.6$  Hz), 139.29, 135.83 (d,  $J = 7.7$  Hz), 113.99 (d,  $J = 23.6$  Hz), 110.78 (d,  $J = 24.5$  Hz), 108.51 (d,  $J = 8.1$  Hz), 70.41, 48.69, 38.07, 32.99, 29.34, 29.05, 26.37, 24.02.  $^{19}\text{F NMR}$  (376 MHz, Chloroform-*d*)  $\delta$  -120.69.

**HRMS** (ESI)  $m/z$ :  $[\text{M} + \text{Na}]^+$  Calcd for  $\text{C}_{15}\text{H}_{20}\text{FNNaO}_2$ : 288.1370; found: 288.1378.

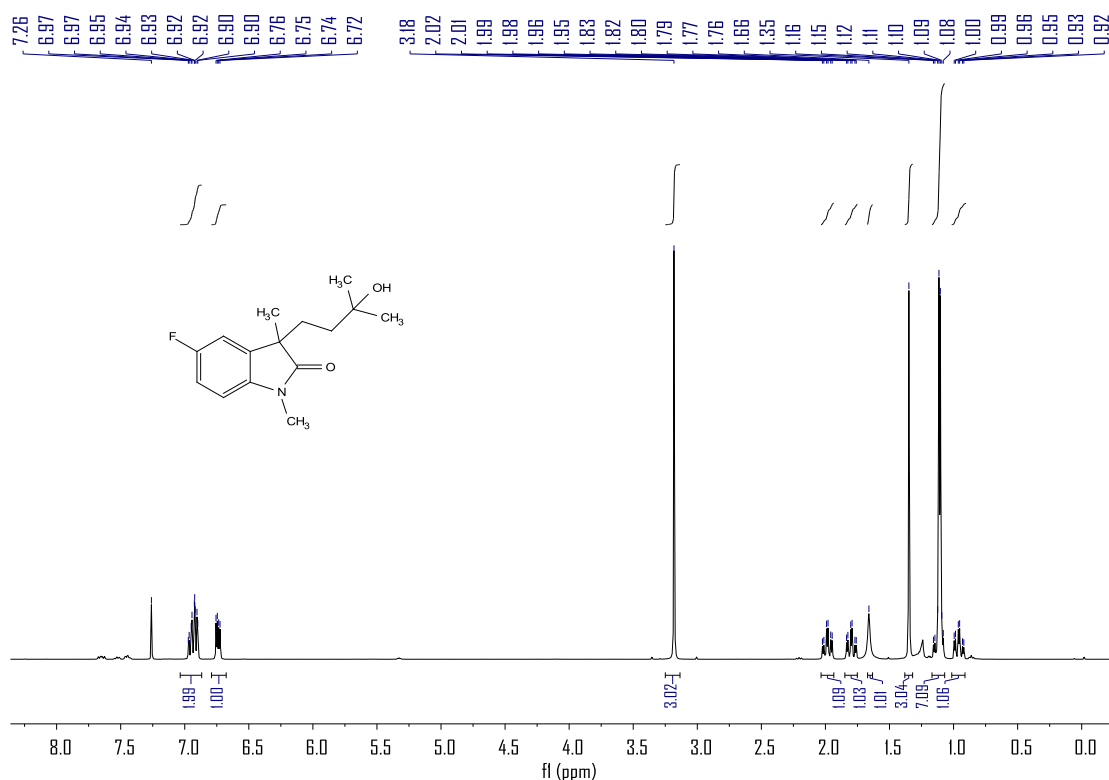

## Supporting Information

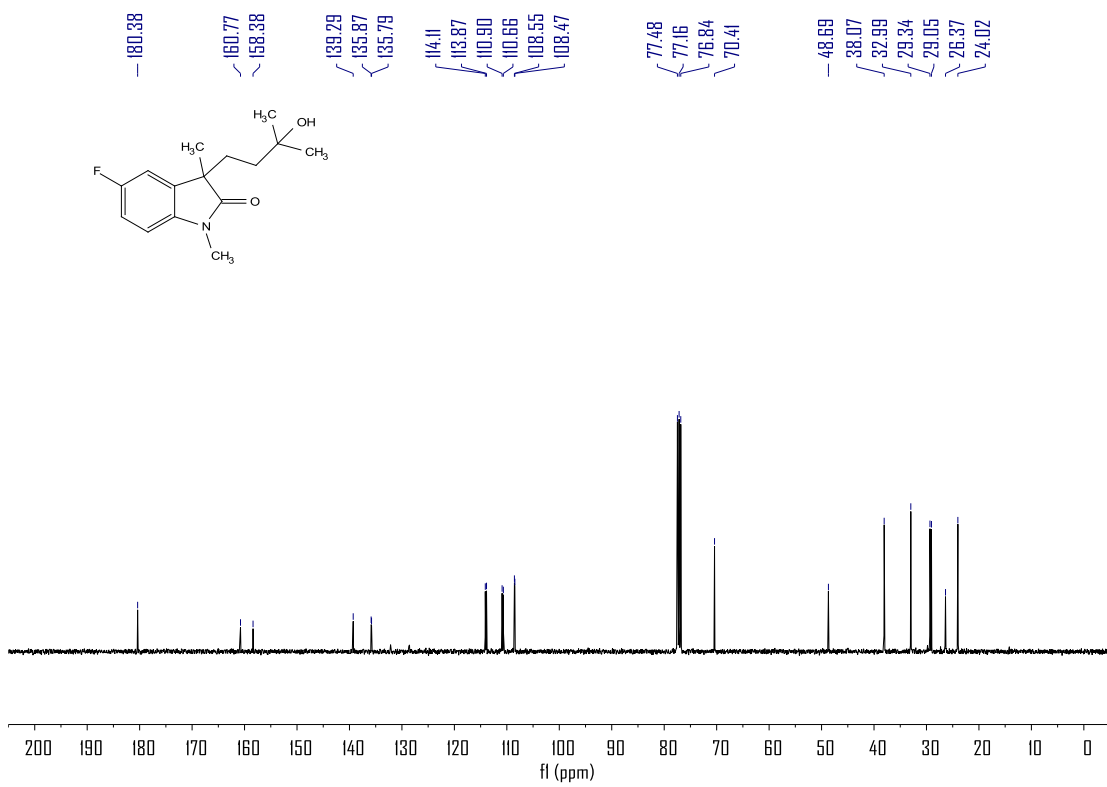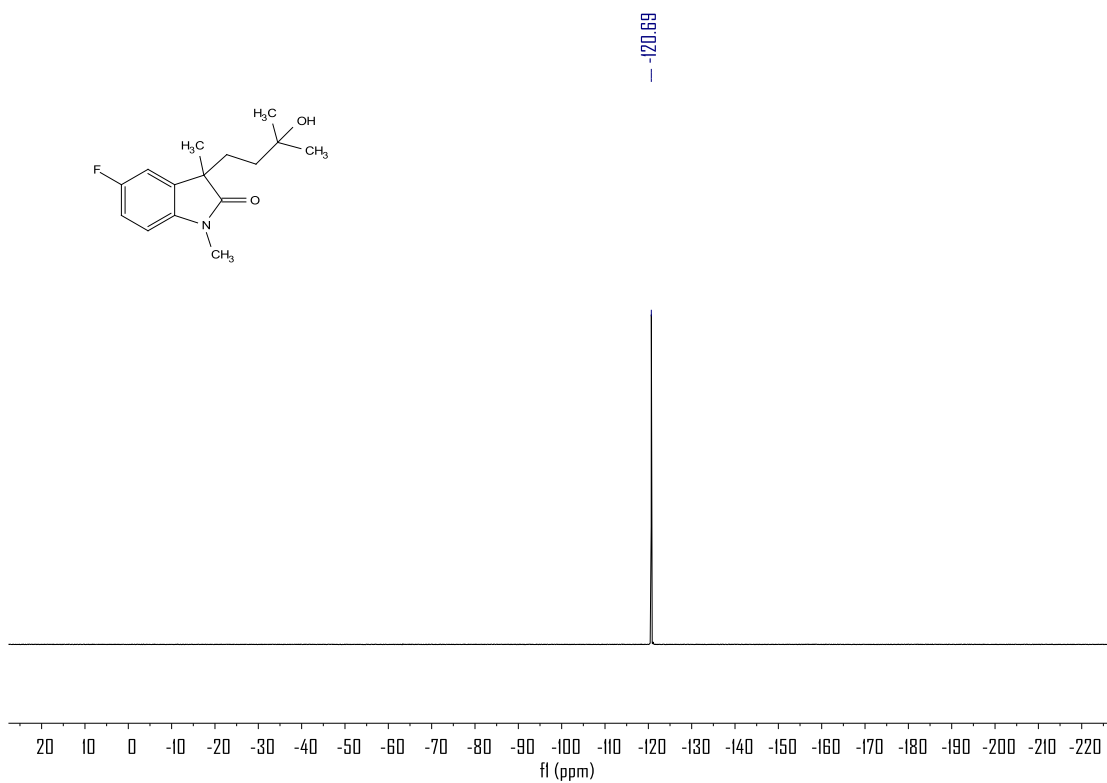



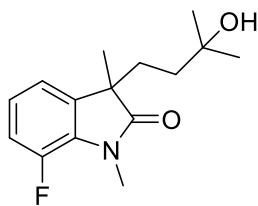

### 7-fluoro-3-(3-hydroxy-3-methylbutyl)-1,3-dimethylindolin-2-one

Following the general procedure (**4f**, pale-yellow liquid, 39 mg, 73%). The residue was purified by silica gel-column chromatography using PE/EtOAc (2:1) as an eluent.  $^1\text{H}$  NMR (400 MHz, Chloroform-*d*)  $\delta$  7.01 – 6.85 (m, 3H), 3.40 (d,  $J = 2.6$  Hz, 3H), 1.98 (td,  $J = 13.0, 4.5$  Hz, 1H), 1.80 (td,  $J = 13.0, 4.1$  Hz, 1H), 1.70 (s, 1H), 1.34 (s, 3H), 1.10 (d,  $J = 4.7$  Hz, 7H), 0.94 (td,  $J = 13.0, 4.1$  Hz, 1H).  $^{19}\text{F}$  NMR (376 MHz, Chloroform-*d*)  $\delta$  -136.75.  $^{13}\text{C}$  NMR (101 MHz, Chloroform-*d*)  $\delta$  180.34, 147.84 (d,  $J = 243.5$  Hz), 137.10 (d,  $J = 2.9$  Hz), 129.88 (d,  $J = 7.9$  Hz), 123.23 (d,  $J = 6.3$  Hz), 118.36 (d,  $J = 3.2$  Hz), 115.80 (d,  $J = 19.2$  Hz), 70.38, 48.55, 38.06, 33.21, 29.30, 29.03, 28.67, 24.29.

HRMS (ESI)  $m/z$ :  $[\text{M} + \text{Na}]^+$  Calcd for  $\text{C}_{15}\text{H}_{20}\text{FNNaO}_2$ : 288.1370; found: 288.1366.

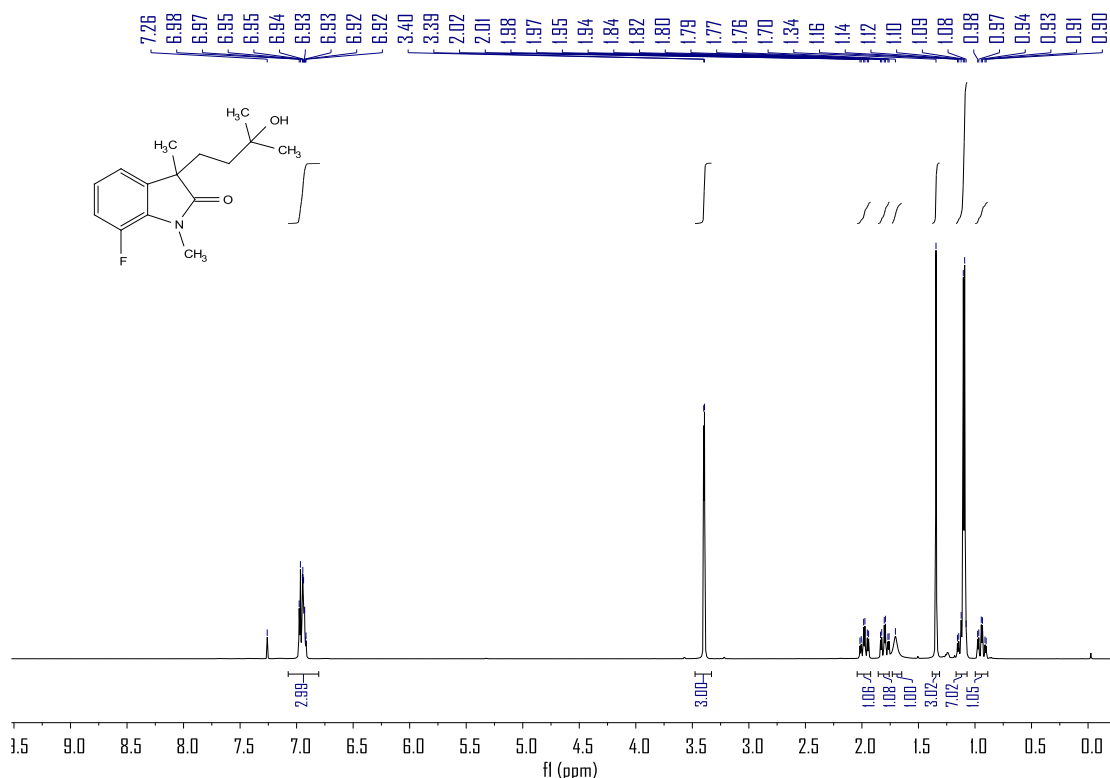

## Supporting Information

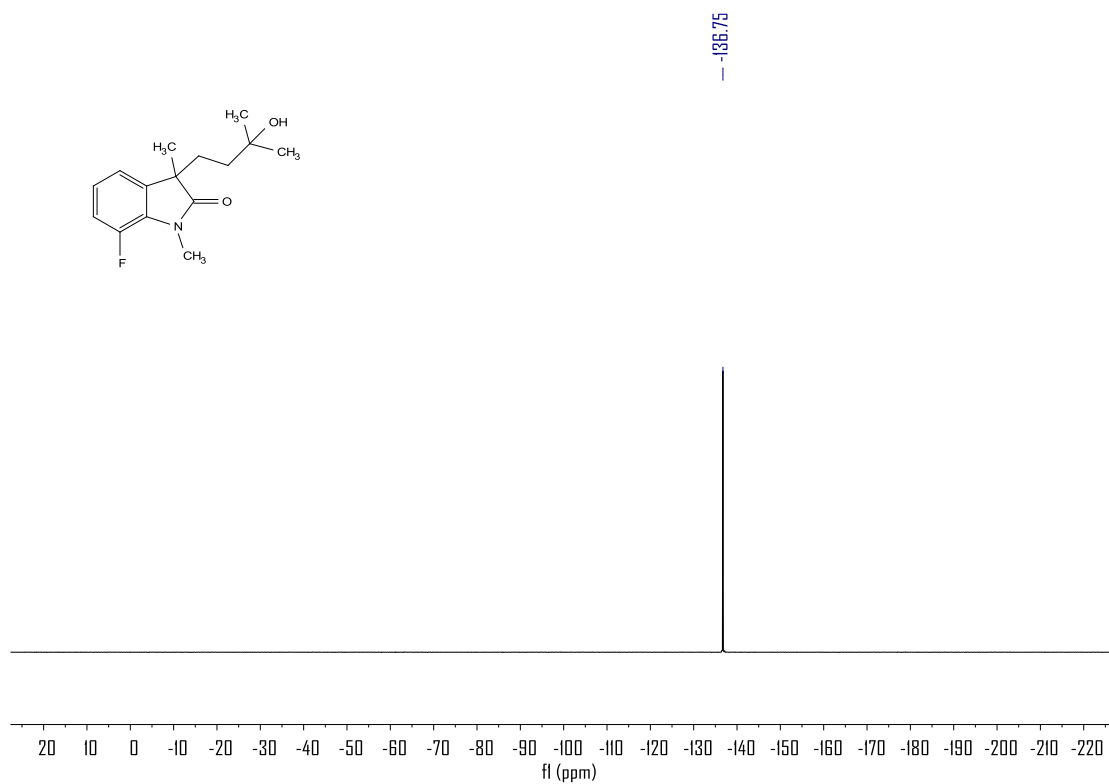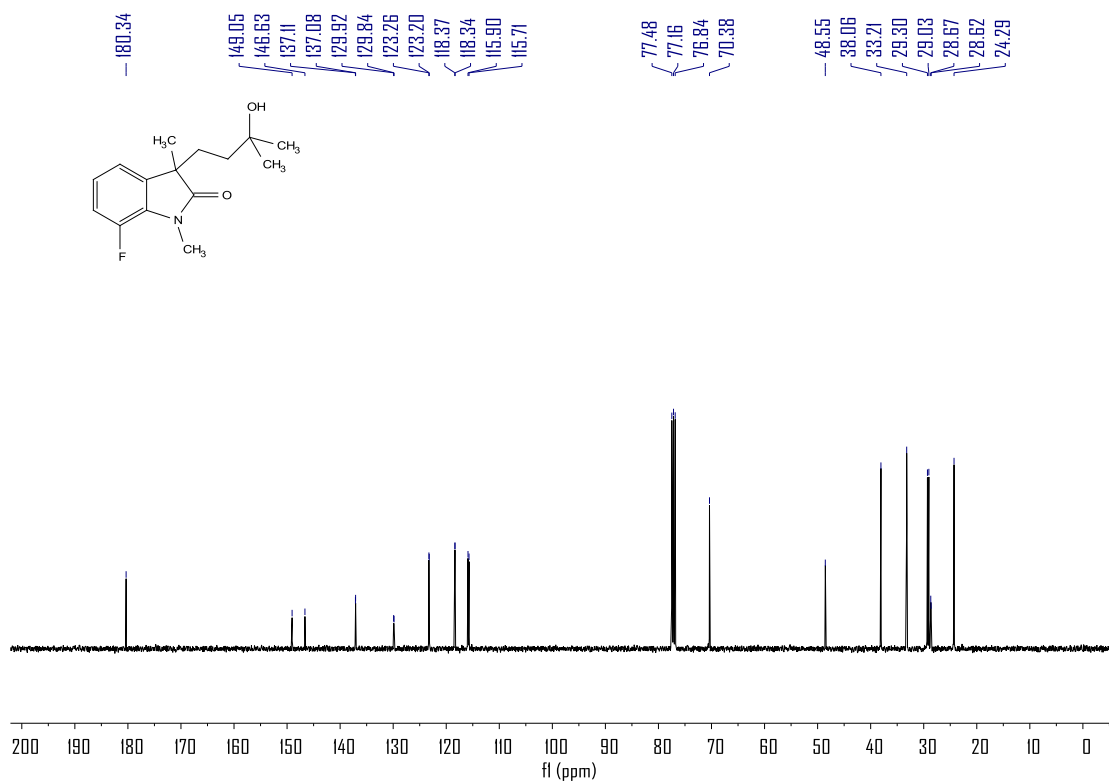

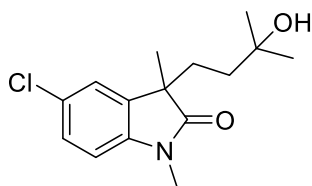

**5-chloro-3-(3-hydroxy-3-methylbutyl)-1,3-dimethylindolin-2-one**

Following the general procedure (**4g**, pale-yellow liquid, 51 mg, 91%). The residue was purified by silica gel-column chromatography using PE/EtOAc (2:1) as an eluent.  $^1\text{H}$  NMR (400 MHz, Chloroform-*d*)  $\delta$  7.37 – 7.32 (m, 1H), 7.26 (s, 1H), 6.88 (dt,  $J = 8.3, 1.3$  Hz, 1H), 3.33 – 3.28 (m, 3H), 2.16 – 2.07 (m, 1H), 1.98 – 1.87 (m, 2H), 1.51 – 1.44 (m, 3H), 1.28 – 1.17 (m, 7H), 1.14 – 1.04 (m, 1H).  $^{13}\text{C}$  NMR (101 MHz, Chloroform-*d*)  $\delta$  180.23, 141.95, 135.85, 128.12, 127.80, 123.13, 109.02, 70.40, 48.48, 38.05, 32.96, 29.33, 29.06, 26.38, 26.35, 23.99.

**HRMS** (ESI)  $m/z$ :  $[\text{M} + \text{Na}]^+$  Calcd for  $\text{C}_{15}\text{H}_{20}\text{ClNNaO}_2$ : 304.1075; found: 304.1079.

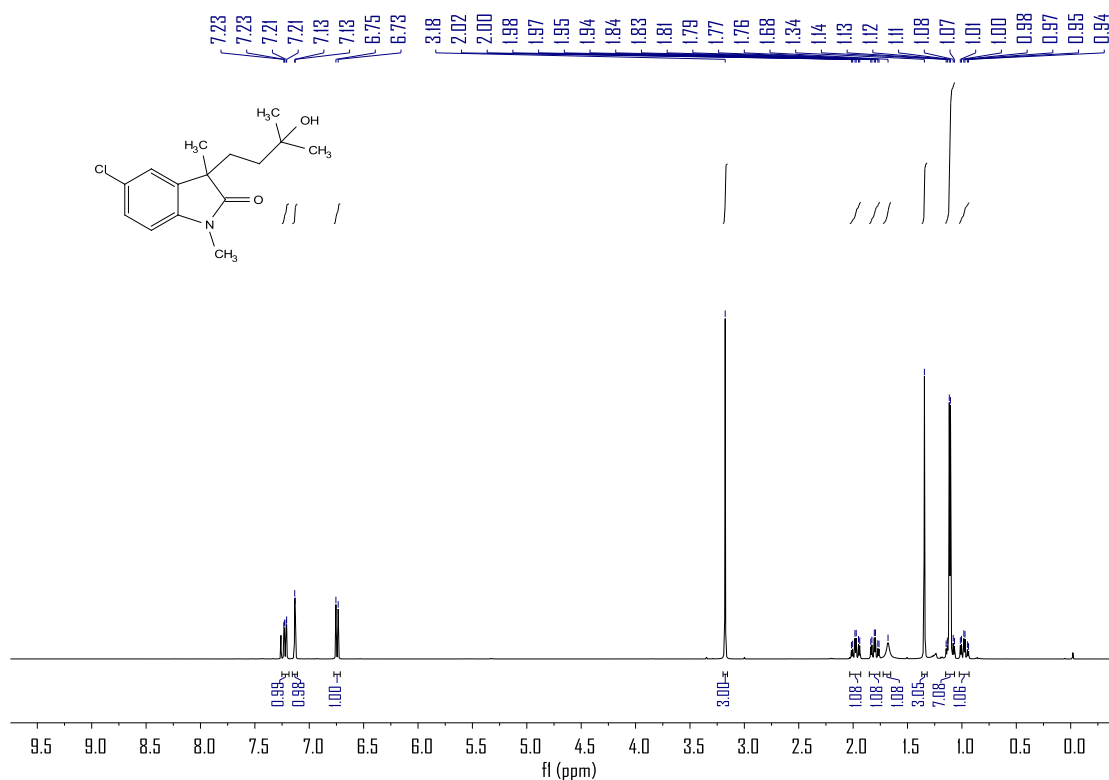

## Supporting Information

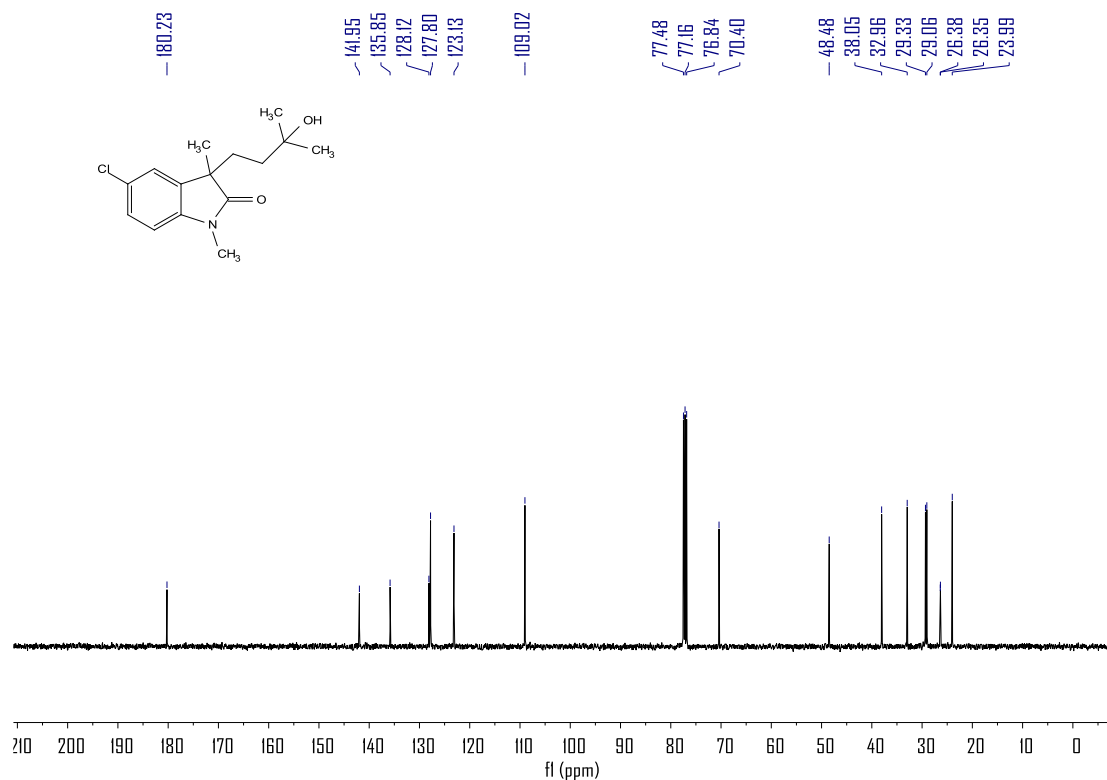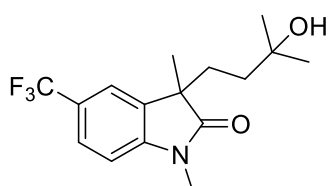

### 3-(3-hydroxy-3-methylbutyl)-1,3-dimethyl-5-(trifluoromethyl)indolin-2-one

Following the general procedure (**4h**, pale-yellow liquid, 43 mg, 69%). The residue was purified by silica gel-column chromatography using PE/EtOAc (2:1) as an eluent.  $^1\text{H NMR}$  (400 MHz, Chloroform-*d*)  $\delta$  7.68 – 7.45 (m, 1H), 7.39 (d,  $J = 1.7$  Hz, 1H), 6.90 (d,  $J = 8.1$  Hz, 1H), 3.23 (s, 3H), 2.01 (td,  $J = 13.0, 4.5$  Hz, 1H), 1.85 (td,  $J = 13.1, 4.2$  Hz, 1H), 1.60 (s, 1H), 1.38 (s, 3H), 1.11 (d,  $J = 2.8$  Hz, 7H), 0.96 (td,  $J = 13.0, 4.2$  Hz, 1H).  $^{19}\text{F NMR}$  (376 MHz, Chloroform-*d*)  $\delta$  -61.30.  $^{13}\text{C NMR}$  (101 MHz, Chloroform-*d*)  $\delta$  180.66, 146.38, 134.72, 125.79 (q,  $J = 3.9$  Hz), 125.01 (q,  $J = 32.6$  Hz), 124.58 (q,  $J = 271.3$  Hz), 119.57 (q,  $J = 3.0$  Hz), 107.86, 70.41, 48.21, 38.03, 33.01, 29.24, 29.08, 26.44, 23.91.

**HRMS** (ESI)  $m/z$ :  $[\text{M} + \text{Na}]^+$  Calcd for  $\text{C}_{16}\text{H}_{20}\text{F}_3\text{NNaO}_2$ : 338.1338; found: 338.1340.

## Supporting Information

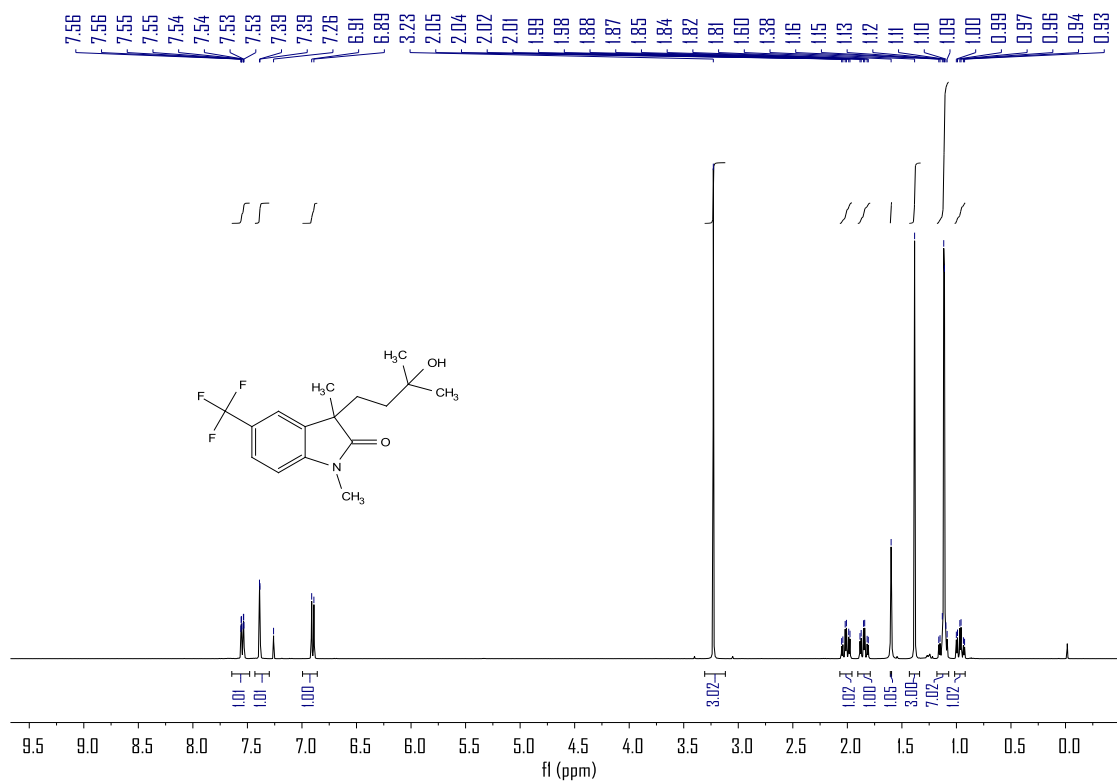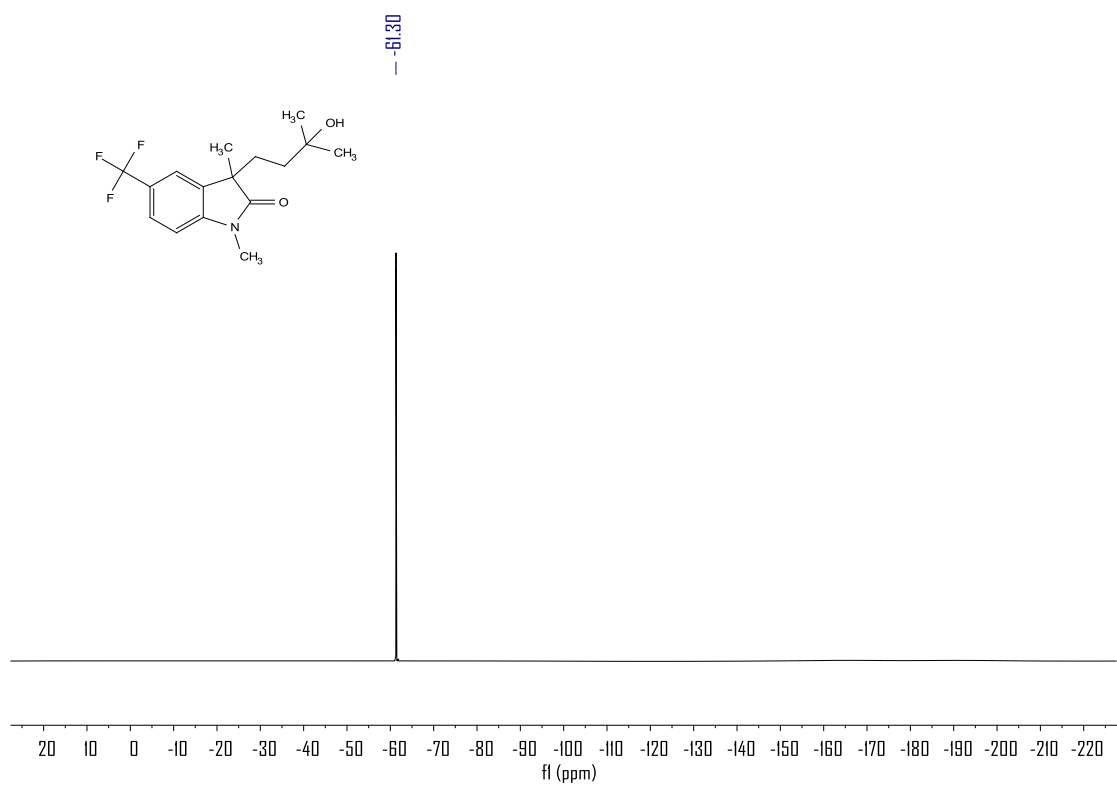

## Supporting Information

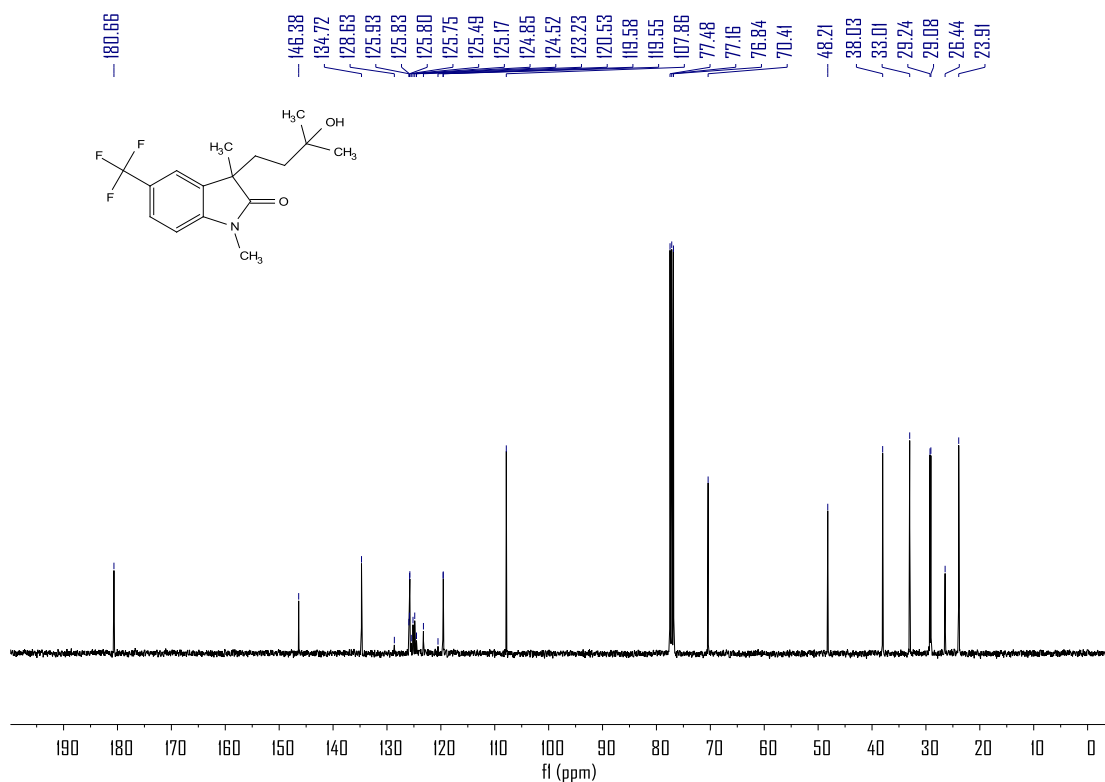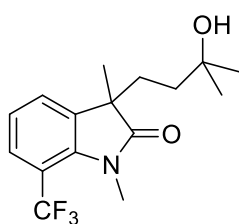

### 3-(3-hydroxy-3-methylbutyl)-1,3-dimethyl-7-(trifluoromethyl)indolin-2-one

Following the general procedure (**4i**, pale-yellow liquid, 44 mg, 70%). The residue was purified by silica gel-column chromatography using PE/EtOAc (2:1) as an eluent.  $^1\text{H NMR}$  (400 MHz, Chloroform-*d*)  $\delta$  7.54 (dd,  $J = 8.2, 1.2$  Hz, 1H), 7.33 (dd,  $J = 7.4, 1.2$  Hz, 1H), 7.12 (t,  $J = 7.7$  Hz, 1H), 3.40 (d,  $J = 2.5$  Hz, 3H), 2.02 (td,  $J = 13.0, 4.6$  Hz, 1H), 1.83 (td,  $J = 13.0, 4.0$  Hz, 1H), 1.54 (s, 1H), 1.37 (s, 3H), 1.11 (d,  $J = 5.9$  Hz, 7H), 0.91 (td,  $J = 13.0, 4.0$  Hz, 1H).  $^{19}\text{F NMR}$  (376 MHz, Chloroform-*d*)  $\delta$  -53.05.  $^{13}\text{C NMR}$  (101 MHz, Chloroform-*d*)  $\delta$  181.43, 141.25, 136.67, 125.92, 125.84 (q,  $J = 6.1$  Hz), 123.79 (q,  $J = 271.4$  Hz), 122.03, 112.54 (q,  $J = 32.7$  Hz), 70.41, 46.56, 37.89, 33.31, 29.42, 29.01, 28.81, 24.47.

**HRMS** (ESI)  $m/z$ :  $[\text{M} + \text{Na}]^+$  Calcd for  $\text{C}_{16}\text{H}_{20}\text{F}_3\text{NNaO}_2$ : 338.1338; found: 338.1346.

## Supporting Information

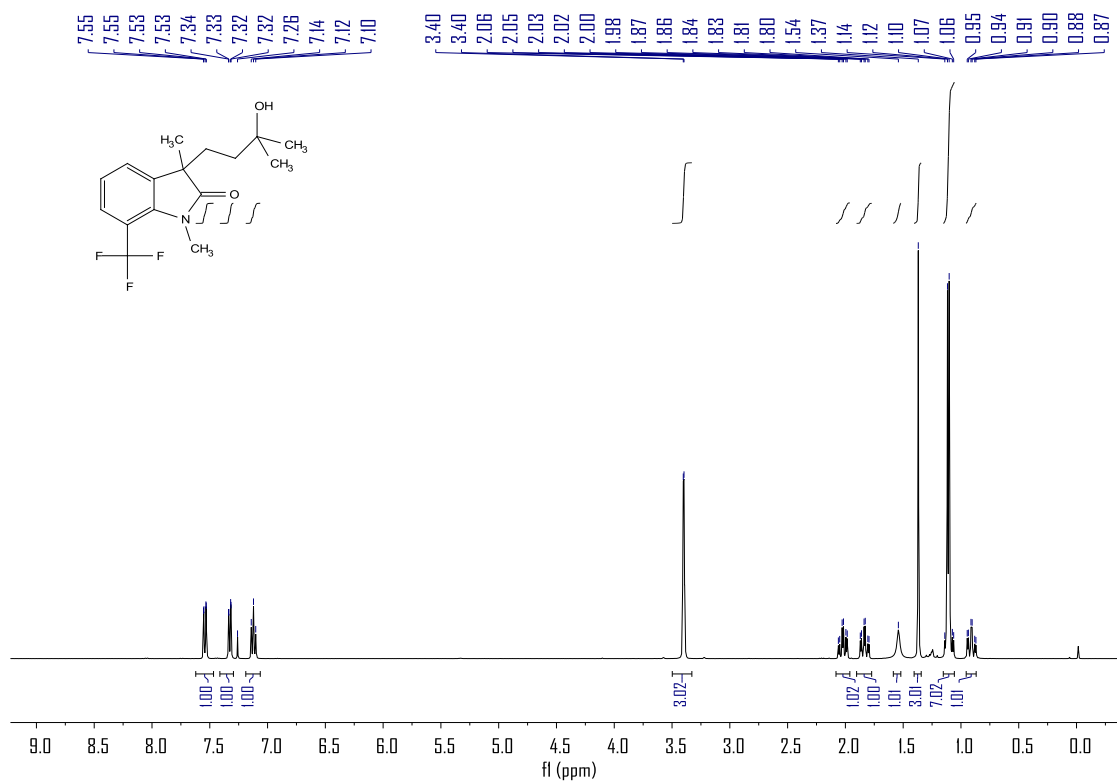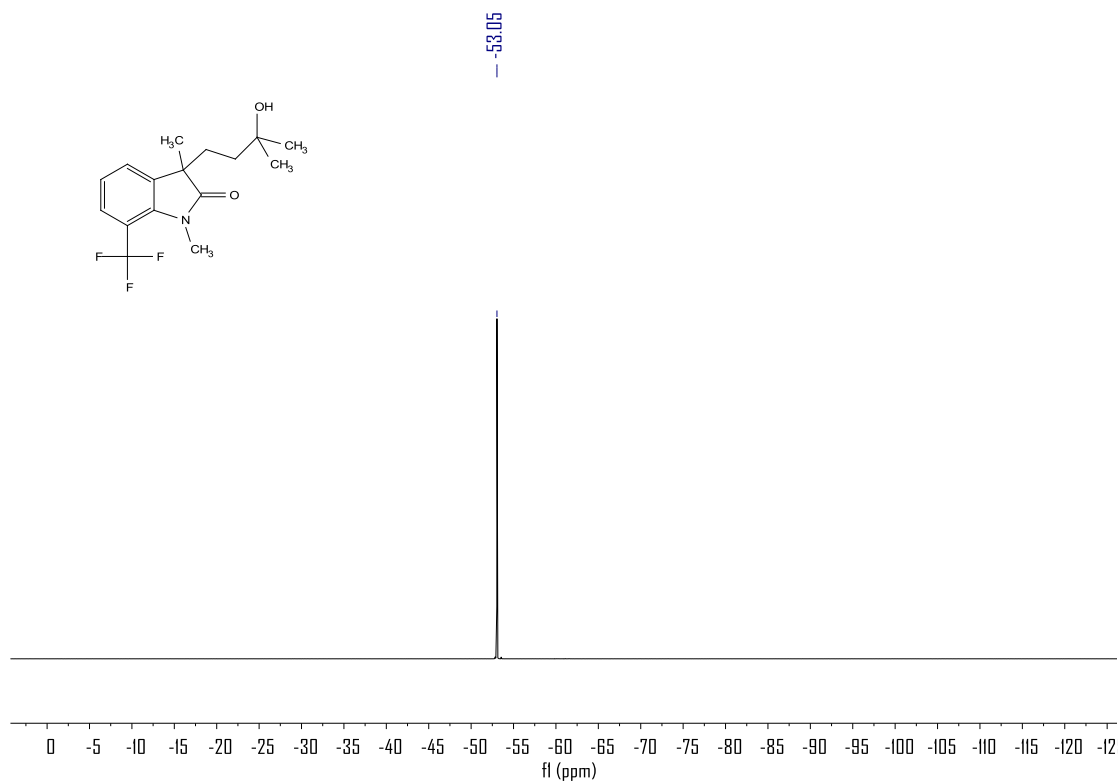

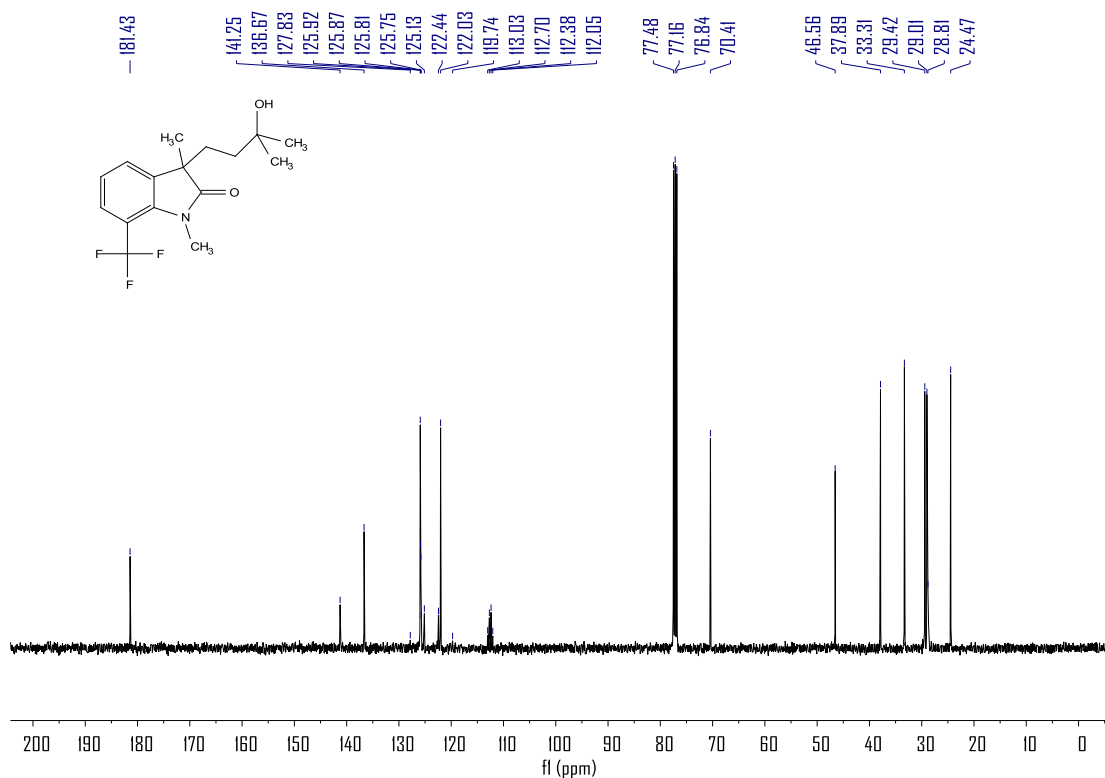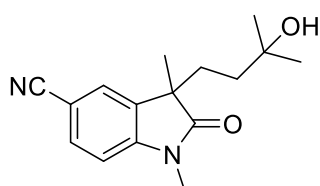

### 3-(3-hydroxy-3-methylbutyl)-1,3-dimethyl-2-oxindoline-5-carbonitrile

Following the general procedure (**4j**, pale-yellow liquid, 22 mg, 40%). The residue was purified by silica gel-column chromatography using PE/EtOAc (1:1) as an eluent.  $^1\text{H NMR}$  (400 MHz, Chloroform-*d*)  $\delta$  7.59 (dd,  $J = 8.1, 1.6$  Hz, 1H), 7.41 (d,  $J = 1.7$  Hz, 1H), 6.90 (d,  $J = 8.1$  Hz, 1H), 3.22 (s, 3H), 2.00 (td,  $J = 13.1, 4.5$  Hz, 1H), 1.84 (td,  $J = 13.1, 4.1$  Hz, 1H), 1.63 (s, 1H), 1.37 (s, 3H), 1.11 (d,  $J = 3.7$  Hz, 7H), 0.94 (td,  $J = 13.0, 4.1$  Hz, 1H).  $^{13}\text{C NMR}$  (101 MHz, Chloroform-*d*)  $\delta$  180.38, 147.26, 135.14, 133.33, 125.95, 119.35, 108.53, 105.79, 70.27, 48.03, 37.92, 32.88, 29.36, 29.05, 26.49, 26.46, 23.82.

**HRMS** (ESI)  $m/z$ :  $[\text{M} + \text{Na}]^+$  Calcd for  $\text{C}_{16}\text{H}_{20}\text{N}_2\text{NaO}_2$ : 295.1417; found: 295.1422.



## Supporting Information

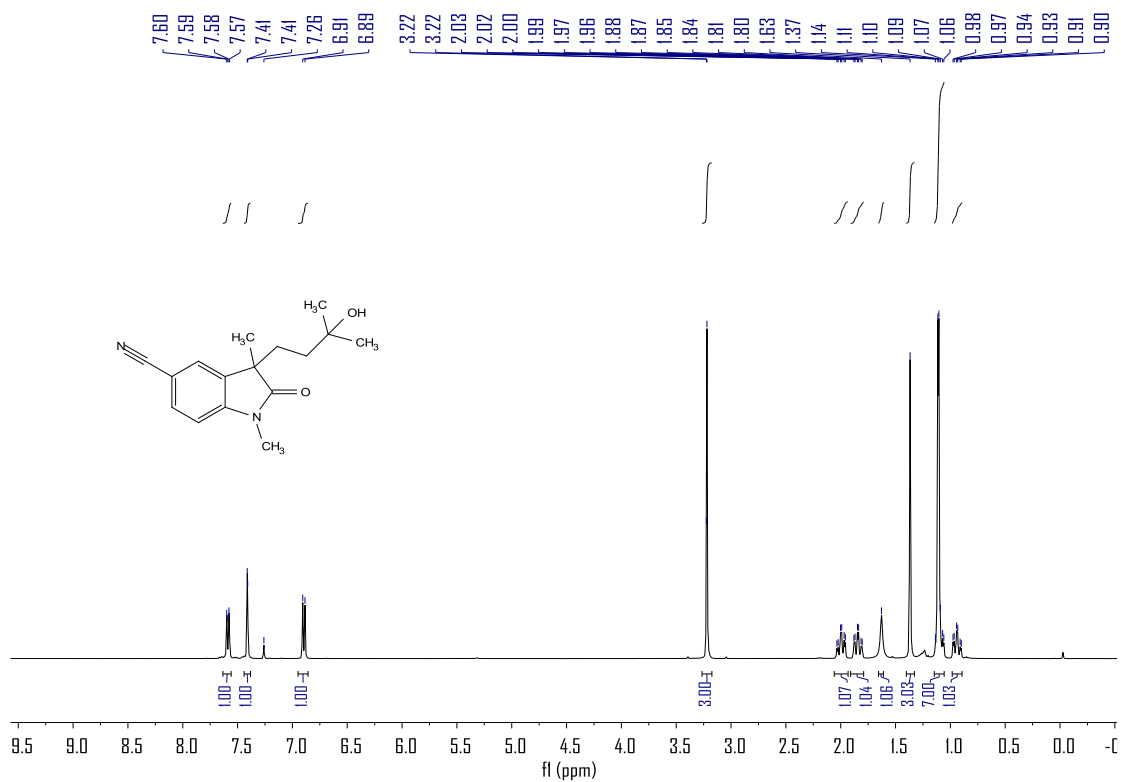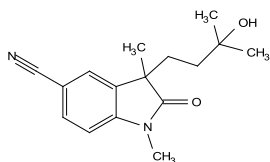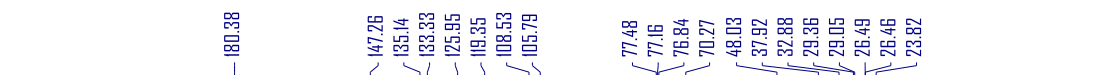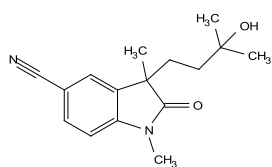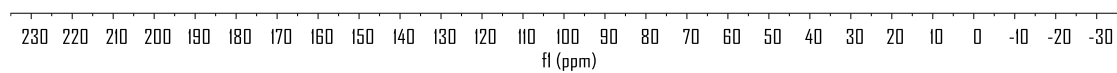

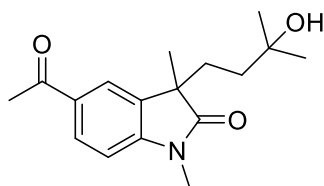**5-acetyl-3-(3-hydroxy-3-methylbutyl)-1,3-dimethylindolin-2-one**

Following the general procedure (**4k**, pale-yellow liquid, 33 mg, 58%). The residue was purified by silica gel-column chromatography using PE/EtOAc (1:1) as an eluent.  $^1\text{H}$  NMR (400 MHz, Chloroform-*d*)  $\delta$  7.92 (dd,  $J = 8.2, 1.7$  Hz, 1H), 7.81 (d,  $J = 1.6$  Hz, 1H), 6.88 (d,  $J = 8.2$  Hz, 1H), 3.24 (d,  $J = 1.2$  Hz, 3H), 2.58 (d,  $J = 0.9$  Hz, 3H), 2.01 (td,  $J = 13.0, 4.5$  Hz, 1H), 1.87 (td,  $J = 13.0, 4.3$  Hz, 1H), 1.60 (s, 1H), 1.39 (s, 3H), 1.15 – 1.05 (m, 7H), 0.96 (td,  $J = 12.9, 4.3$  Hz, 1H).  $^{13}\text{C}$  NMR (101 MHz, Chloroform-*d*)  $\delta$  197.16, 181.08, 147.77, 134.34, 132.32, 130.13, 122.39, 107.53, 70.47, 48.06, 38.04, 33.00, 29.30, 29.07, 26.57, 26.52, 23.99.

HRMS (ESI)  $m/z$ :  $[\text{M} + \text{Na}]^+$  Calcd for  $\text{C}_{17}\text{H}_{23}\text{NNaO}_3$ : 312.1570; found: 312.1576.

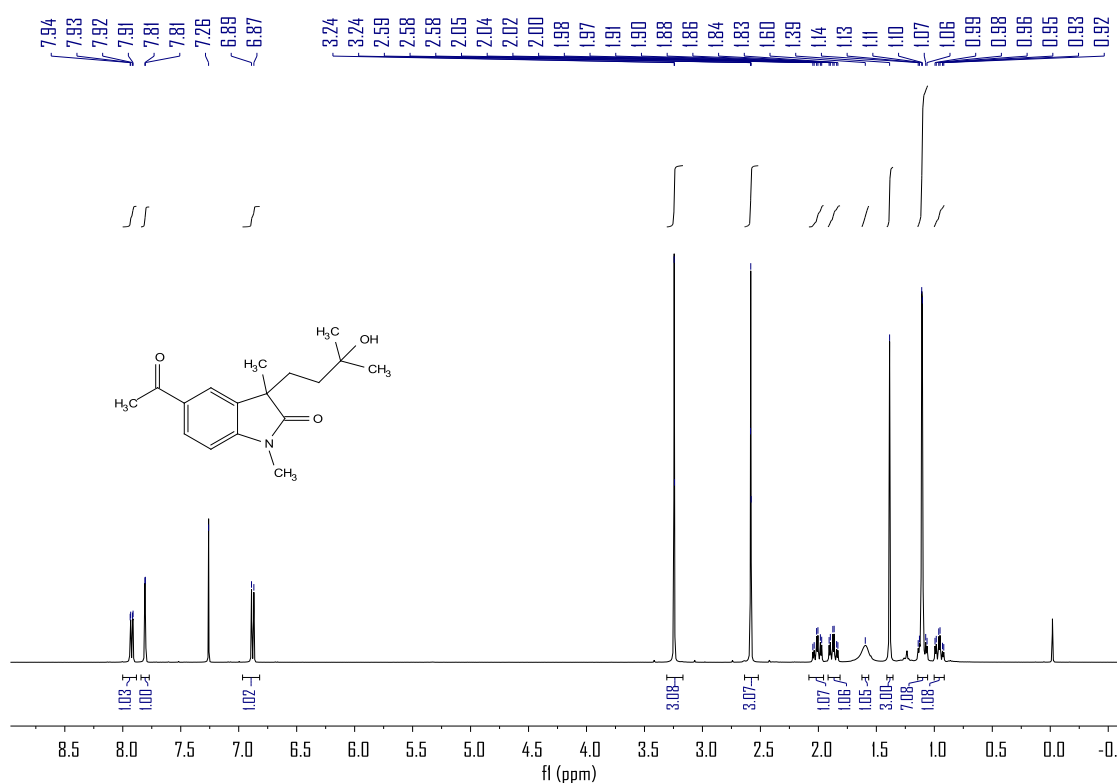

## Supporting Information

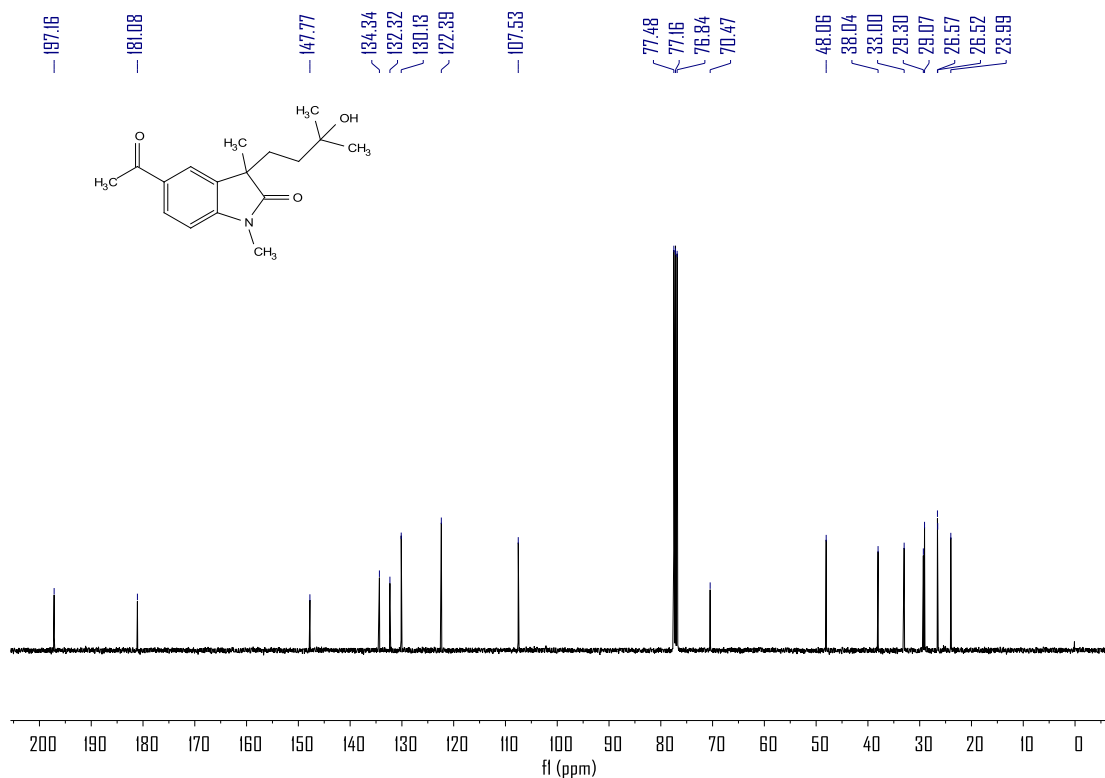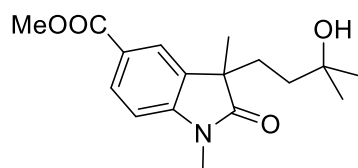

### Methyl-3-(3-hydroxy-3-methylbutyl)-1,3-dimethyl-2-oxoindoline-5-carboxylate

Following the general procedure (**4l**, pale-yellow liquid, 37 mg, 61%). The residue was purified by silica gel-column chromatography using PE/EtOAc (1:1) as an eluent.  $^1\text{H NMR}$  (400 MHz, Chloroform-*d*)  $\delta$  8.00 (dd,  $J = 8.2, 1.7$  Hz, 1H), 7.82 (d,  $J = 1.6$  Hz, 1H), 6.86 (d,  $J = 8.2$  Hz, 1H), 3.88 (s, 3H), 3.22 (s, 3H), 1.99 (td,  $J = 13.0, 4.5$  Hz, 1H), 1.86 (td,  $J = 13.0, 4.3$  Hz, 1H), 1.37 (s, 3H), 1.14 – 1.04 (m, 7H), 0.94 (td,  $J = 12.9, 4.3$  Hz, 1H).  $^{13}\text{C NMR}$  (101 MHz, Chloroform-*d*)  $\delta$  181.03, 167.08, 147.49, 133.96, 130.69, 124.60, 123.78, 107.67, 70.38, 52.16, 48.03, 38.00, 32.94, 29.25, 29.03, 26.45, 23.94.

**HRMS** (ESI)  $m/z$ :  $[\text{M} + \text{Na}]^+$  Calcd for  $\text{C}_{17}\text{H}_{23}\text{NNaO}_4$ : 328.1519; found: 328.1523.

## Supporting Information

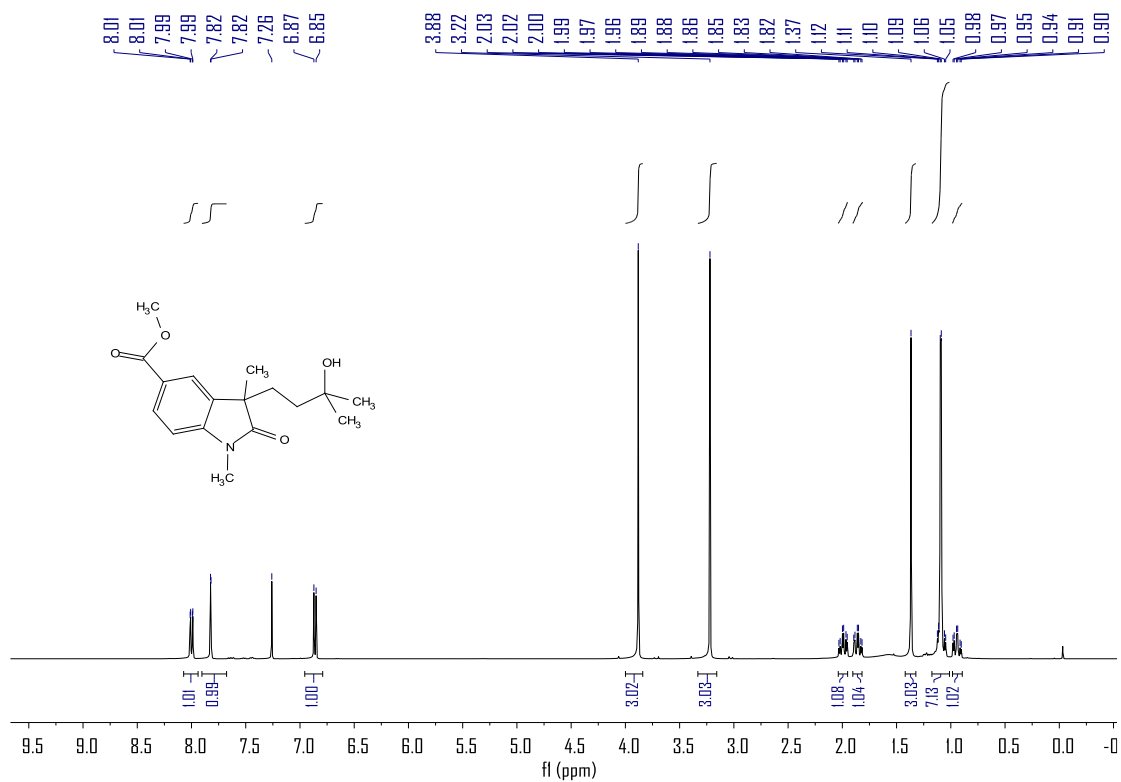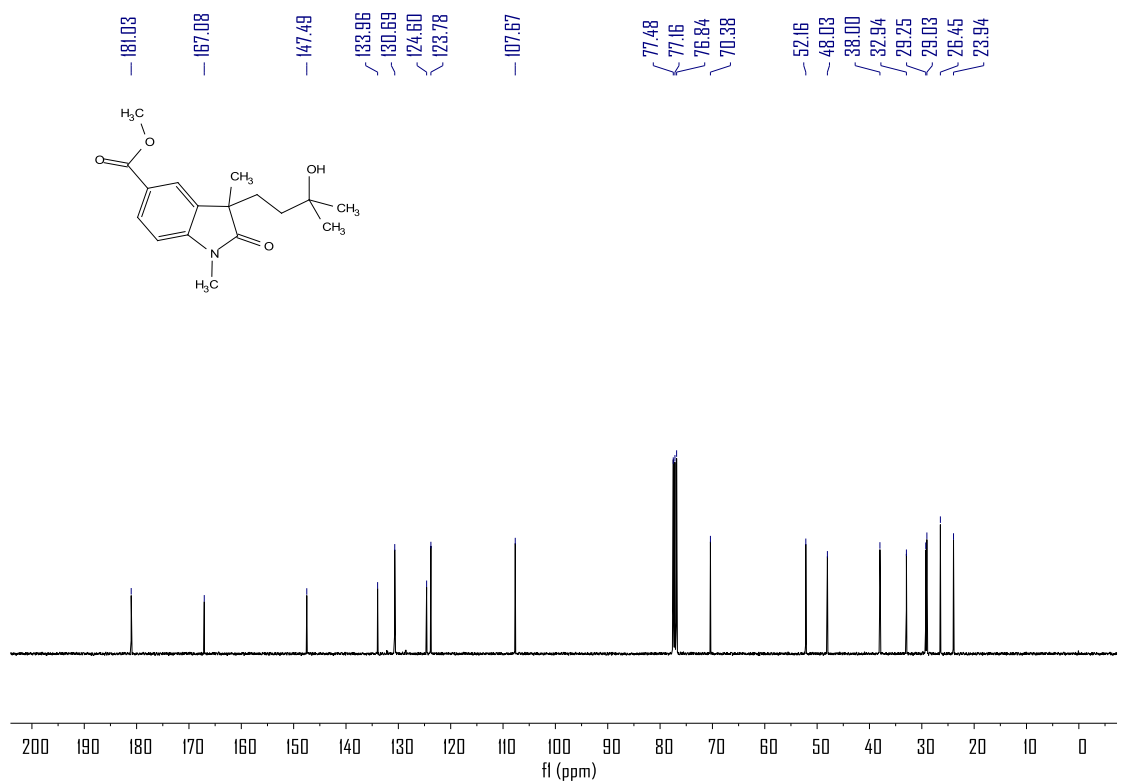

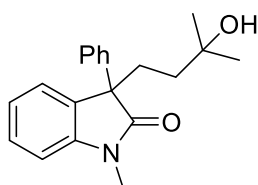

### 3-(3-hydroxy-3-methylbutyl)-1-methyl-3-phenylindolin-2-one

Following the general procedure (**4m**, pale-yellow liquid, 57 mg, 92%). The residue was purified by silica gel-column chromatography using PE/EtOAc (2:1) as an eluent.  $^1\text{H}$  NMR (400 MHz, Chloroform-*d*)  $\delta$  7.46 – 7.40 (m, 2H), 7.39 – 7.24 (m, 5H), 7.16 (t,  $J = 7.5$  Hz, 1H), 6.94 (d,  $J = 7.8$  Hz, 1H), 3.26 (s, 3H), 2.51 (td,  $J = 12.8, 4.6$  Hz, 1H), 2.34 (td,  $J = 12.9, 3.9$  Hz, 1H), 1.71 (s, 1H), 1.33 (td,  $J = 13.0, 4.7$  Hz, 1H), 1.19 (d,  $J = 3.2$  Hz, 6H), 1.11 (td,  $J = 12.9, 4.0$  Hz, 1H).  $^{13}\text{C}$  NMR (101 MHz, Chloroform-*d*)  $\delta$  178.68, 143.96, 140.26, 132.22, 128.62, 128.31, 127.38, 127.01, 124.85, 122.80, 108.44, 70.59, 56.38, 38.22, 32.69, 29.25, 29.20, 26.48.

HRMS (ESI)  $m/z$ :  $[\text{M} + \text{Na}]^+$  Calcd for  $\text{C}_{20}\text{H}_{23}\text{NNaO}_2$ : 332.1621; found: 332.1620.

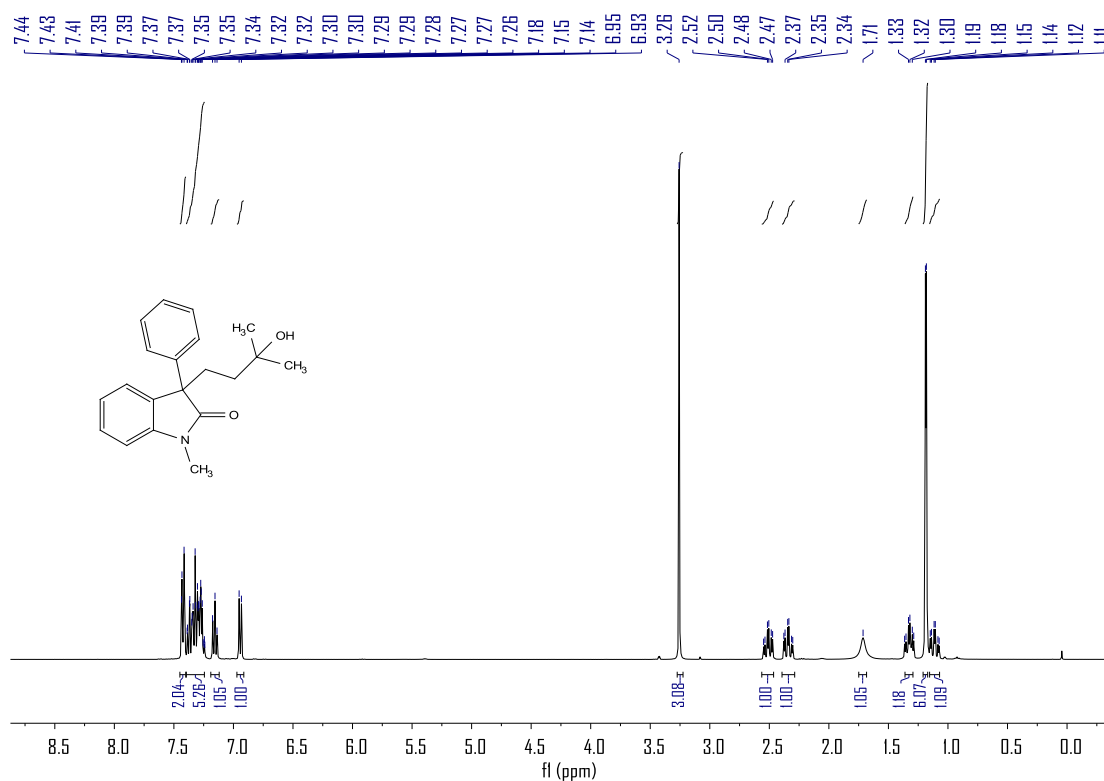

## Supporting Information

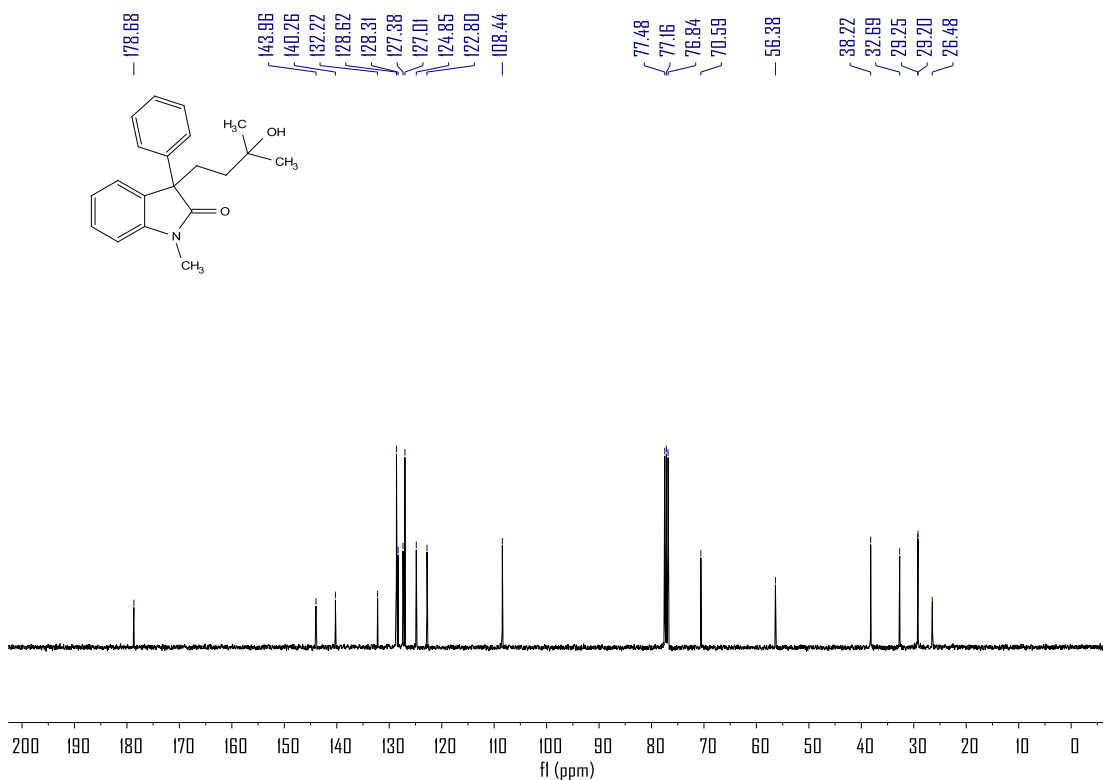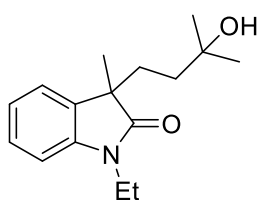

### 1-ethyl-3-(3-hydroxy-3-methylbutyl)-3-methylindolin-2-one

Following the general procedure (**4n**, pale-yellow liquid, 46 mg, 88%). The residue was purified by silica gel-column chromatography using PE/EtOAc (2:1) as an eluent.  $^1\text{H}$  NMR (400 MHz, Chloroform-*d*)  $\delta$  7.27 – 7.22 (m, 1H), 7.17 (dd,  $J = 7.3, 1.2$  Hz, 1H), 7.04 (td,  $J = 7.5, 1.0$  Hz, 1H), 6.85 (d,  $J = 7.8$  Hz, 1H), 3.82 – 3.68 (m, 2H), 1.98 (td,  $J = 12.9, 4.7$  Hz, 1H), 1.82 (td,  $J = 12.9, 4.1$  Hz, 1H), 1.62 (s, 1H), 1.35 (s, 3H), 1.24 (t,  $J = 7.2$  Hz, 3H), 1.18 – 1.08 (m, 7H), 0.95 (td,  $J = 13.0, 4.1$  Hz, 1H).  $^{13}\text{C}$  NMR (101 MHz, Chloroform-*d*)  $\delta$  180.31, 142.46, 134.32, 127.77, 122.74, 122.46, 108.24, 47.98, 38.08, 34.62, 33.09, 29.27, 29.04, 24.08, 12.88.

HRMS (ESI)  $m/z$ :  $[\text{M} + \text{Na}]^+$  Calcd for  $\text{C}_{16}\text{H}_{23}\text{NNaO}_2$ : 284.1621; found: 284.1628.

# Supporting Information

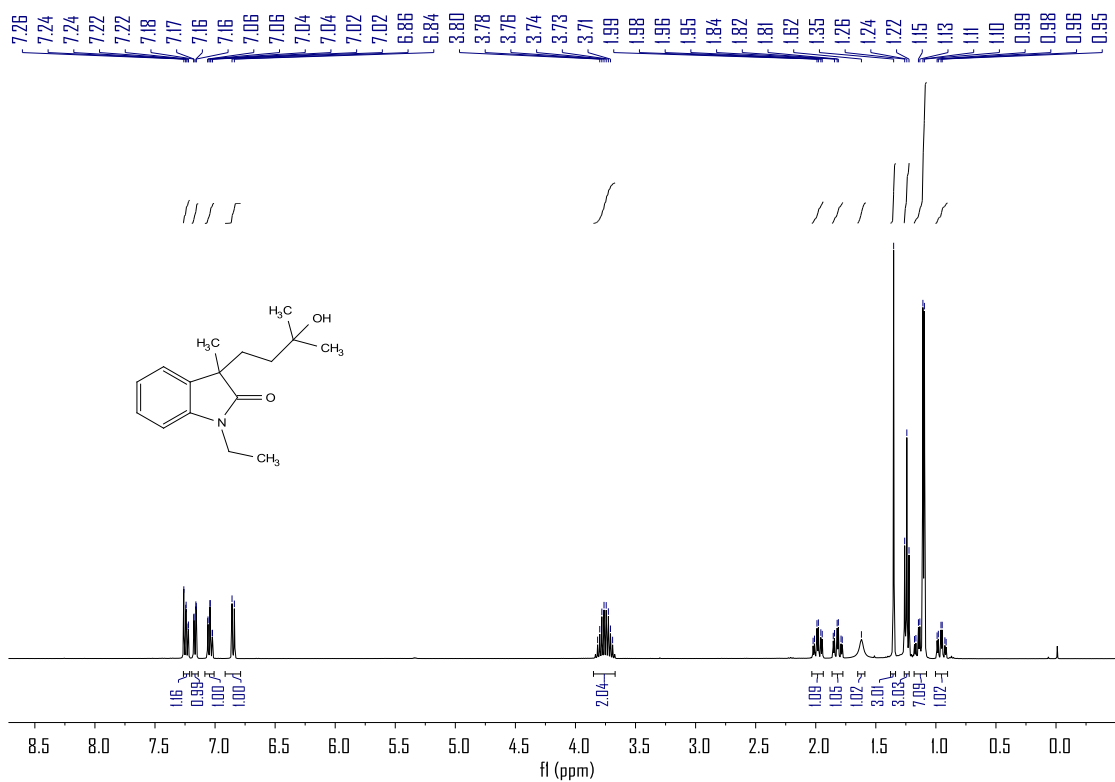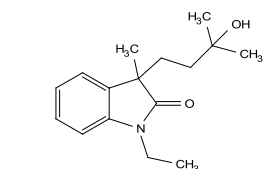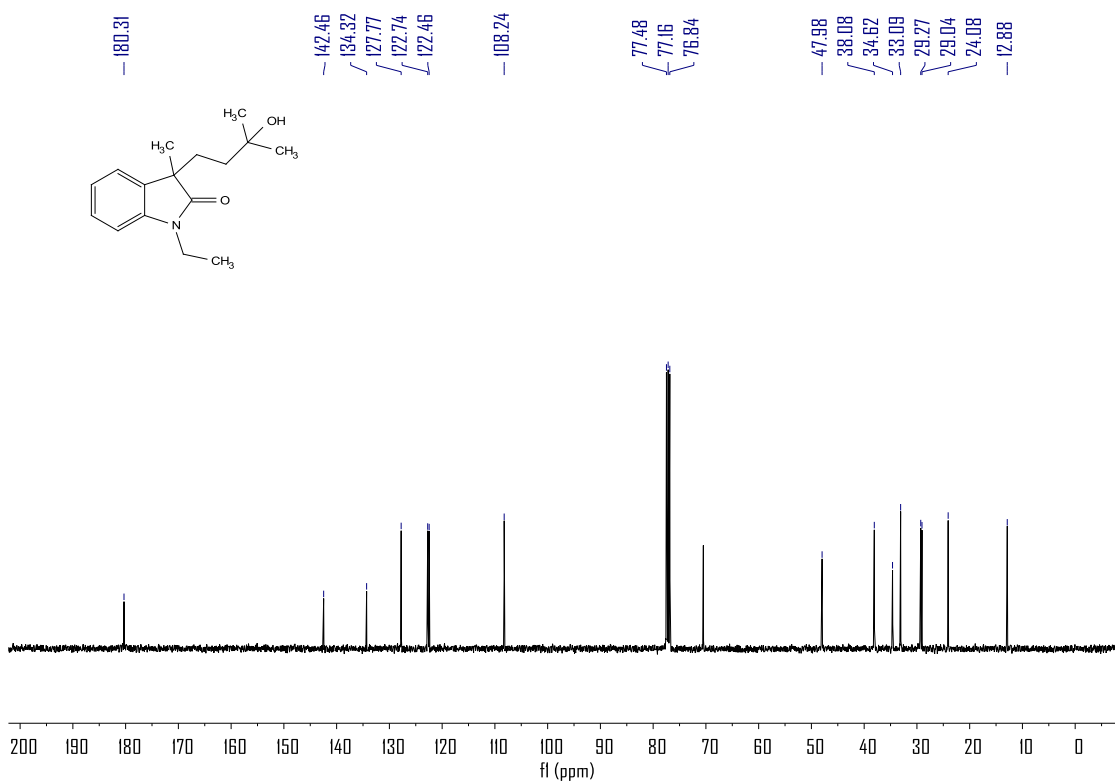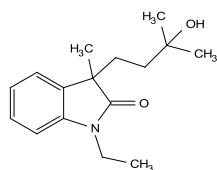

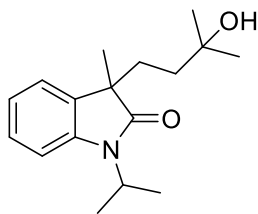

### 3-(3-hydroxy-3-methylbutyl)-1-isopropyl-3-methylindolin-2-one

Following the general procedure (**40**, pale-yellow liquid, 46 mg, 83%). The residue was purified by silica gel-column chromatography using PE/EtOAc (2:1) as an eluent.  $^1\text{H NMR}$  (400 MHz, Chloroform-*d*)  $\delta$  7.21 (td,  $J = 7.7, 1.4$  Hz, 1H), 7.16 (dd,  $J = 7.3, 1.3$  Hz, 1H), 7.05 – 6.98 (m, 2H), 4.63 (p,  $J = 7.0$  Hz, 1H), 1.97 (td,  $J = 12.9, 4.6$  Hz, 1H), 1.79 (td,  $J = 13.0, 4.0$  Hz, 1H), 1.63 (s, 1H), 1.46 (dd,  $J = 7.0, 2.3$  Hz, 6H), 1.34 (s, 3H), 1.17 – 1.08 (m, 7H), 0.92 (td,  $J = 13.0, 4.0$  Hz, 1H).  $^{13}\text{C NMR}$  (101 MHz, Chloroform-*d*)  $\delta$  180.38, 142.02, 134.56, 127.51, 122.78, 122.11, 109.84, 70.44, 47.69, 43.66, 38.03, 33.29, 29.24, 29.05, 24.22, 19.70, 19.53.

**HRMS** (ESI)  $m/z$ :  $[\text{M} + \text{Na}]^+$  Calcd for  $\text{C}_{17}\text{H}_{25}\text{NNaO}_2$ : 298.1778; found: 298.1781.

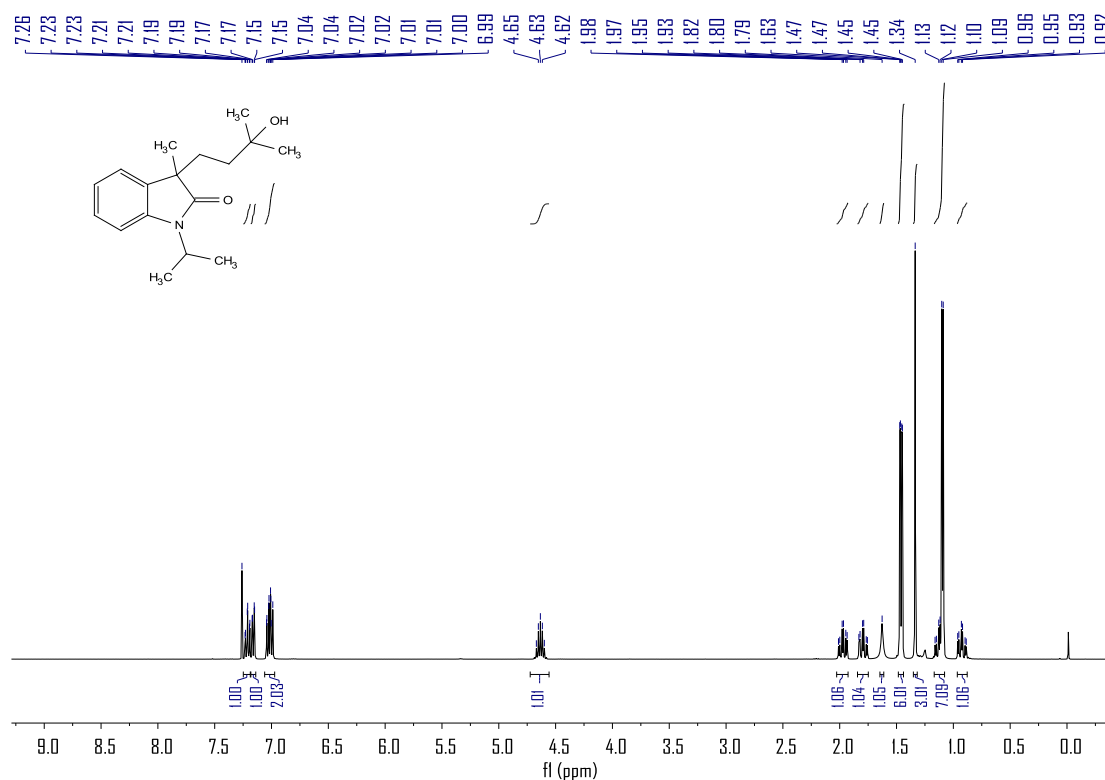



## Supporting Information

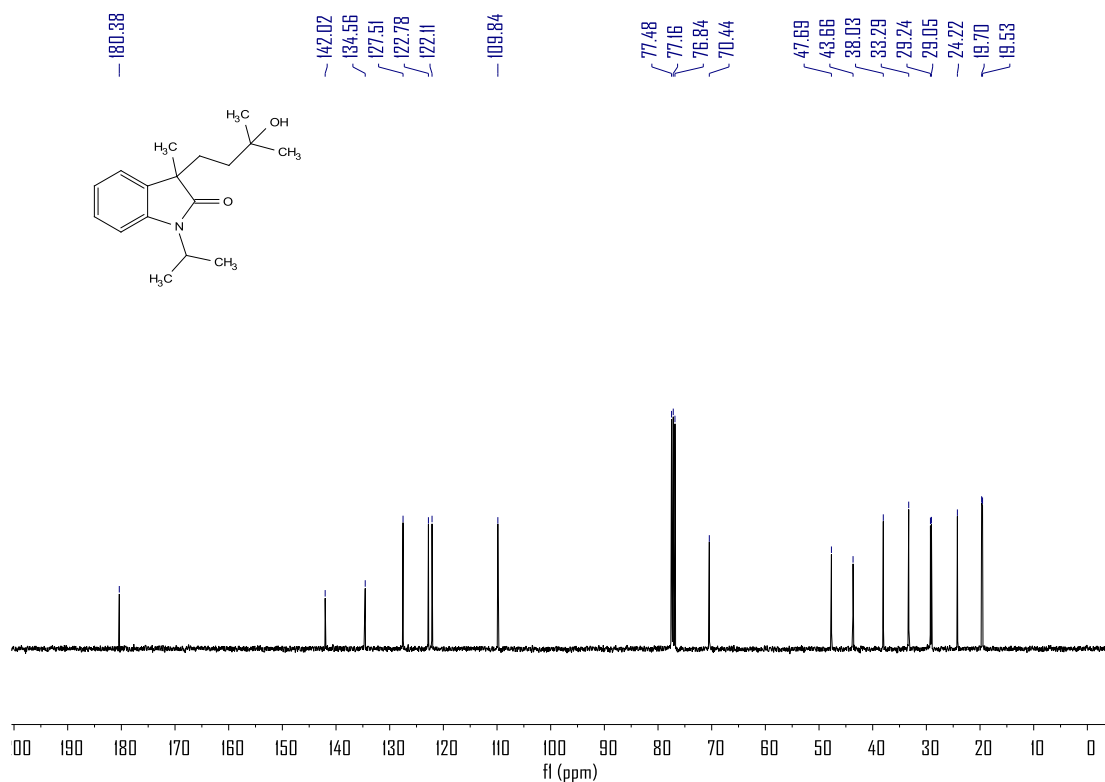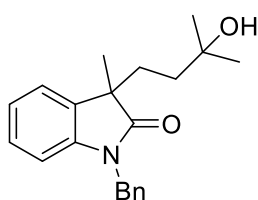

### 1-benzyl-3-(3-hydroxy-3-methylbutyl)-3-methylindolin-2-one

Following the general procedure (**4p**, pale-yellow liquid, 47 mg, 73%). The residue was purified by silica gel-column chromatography using PE/EtOAc (2:1) as an eluent.  $^1\text{H NMR}$  (400 MHz, Chloroform-*d*)  $\delta$  7.33 – 7.22 (m, 5H), 7.20 – 7.12 (m, 2H), 7.03 (td,  $J = 7.5, 1.0$  Hz, 1H), 6.74 (d,  $J = 7.8$  Hz, 1H), 4.91 (q,  $J = 15.6$  Hz, 2H), 2.07 (td,  $J = 12.9, 4.6$  Hz, 1H), 1.89 (td,  $J = 13.0, 4.0$  Hz, 1H), 1.60 (s, 1H), 1.43 (s, 3H), 1.20 (td,  $J = 13.0, 4.6$  Hz, 1H), 1.11 (d,  $J = 8.1$  Hz, 6H), 0.99 (td,  $J = 13.0, 4.0$  Hz, 1H).  $^{13}\text{C NMR}$  (101 MHz, Chloroform-*d*)  $\delta$  180.84, 142.49, 136.25, 134.06, 128.82, 127.76, 127.68, 127.45, 122.73, 122.63, 109.15, 70.45, 48.15, 43.75, 38.32, 33.08, 29.29, 29.06, 24.37.

**HRMS** (ESI)  $m/z$ :  $[\text{M} + \text{Na}]^+$  Calcd for  $\text{C}_{21}\text{H}_{25}\text{NNaO}_2$ : 346.1778; found: 346.1783.

## Supporting Information

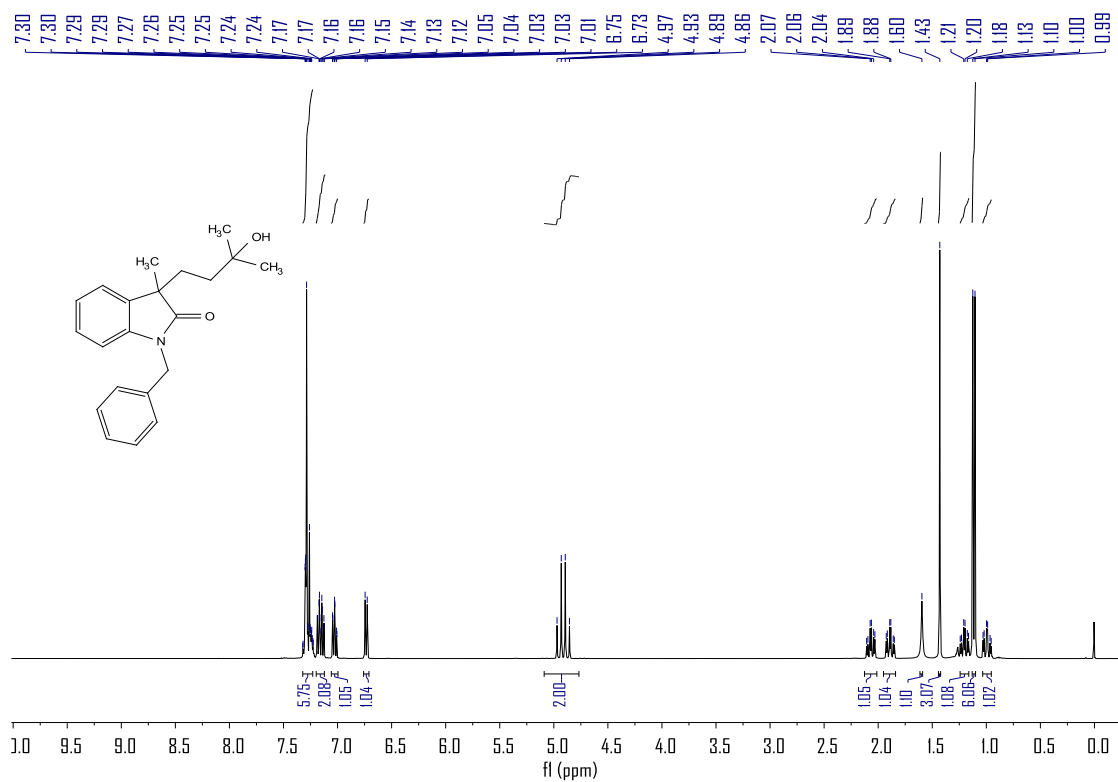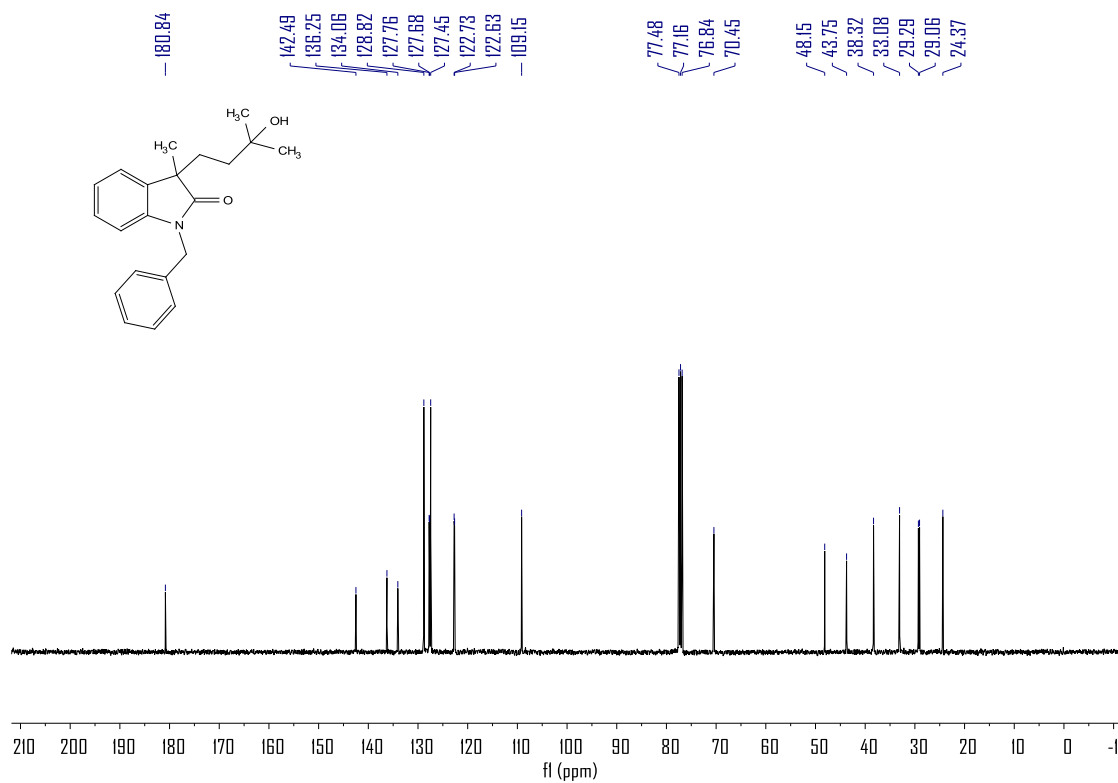

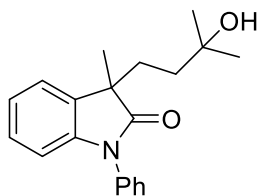

### 3-(3-hydroxy-3-methylbutyl)-3-methyl-1-phenylindolin-2-one

Following the general procedure (**4q**, pale-yellow liquid, 56 mg, 90%). The residue was purified by silica gel-column chromatography using PE/EtOAc (2:1) as an eluent.  $^1\text{H NMR}$  (400 MHz, Chloroform-*d*)  $\delta$  7.55 – 7.47 (m, 2H), 7.42 – 7.36 (m, 3H), 7.26 – 7.16 (m, 2H), 7.10 (t,  $J = 7.4$  Hz, 1H), 6.83 (d,  $J = 7.8$  Hz, 1H), 2.10 (td,  $J = 13.1, 4.6$  Hz, 1H), 1.92 (td,  $J = 13.1, 4.0$  Hz, 1H), 1.62 (s, 1H), 1.49 (s, 3H), 1.30 (td,  $J = 13.3, 4.8$  Hz, 1H), 1.13 (d,  $J = 4.6$  Hz, 7H).  $^{13}\text{C NMR}$  (101 MHz, Chloroform-*d*)  $\delta$  180.19, 143.28, 134.71, 133.83, 129.64, 128.03, 127.74, 126.65, 123.19, 122.87, 109.43, 70.50, 48.21, 38.18, 33.55, 29.33, 29.05, 24.40.

**HRMS** (ESI)  $m/z$ :  $[\text{M} + \text{Na}]^+$  Calcd for  $\text{C}_{20}\text{H}_{23}\text{NNaO}_2$ : 332.1621; found: 332.1626.

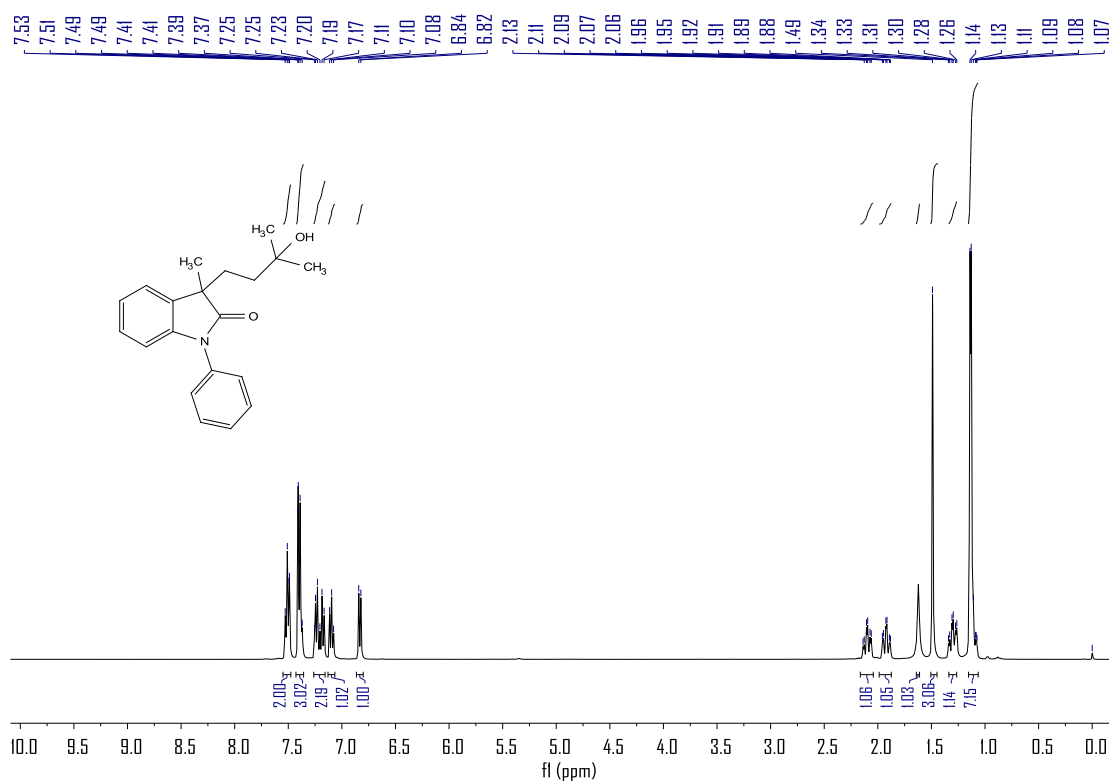

## Supporting Information

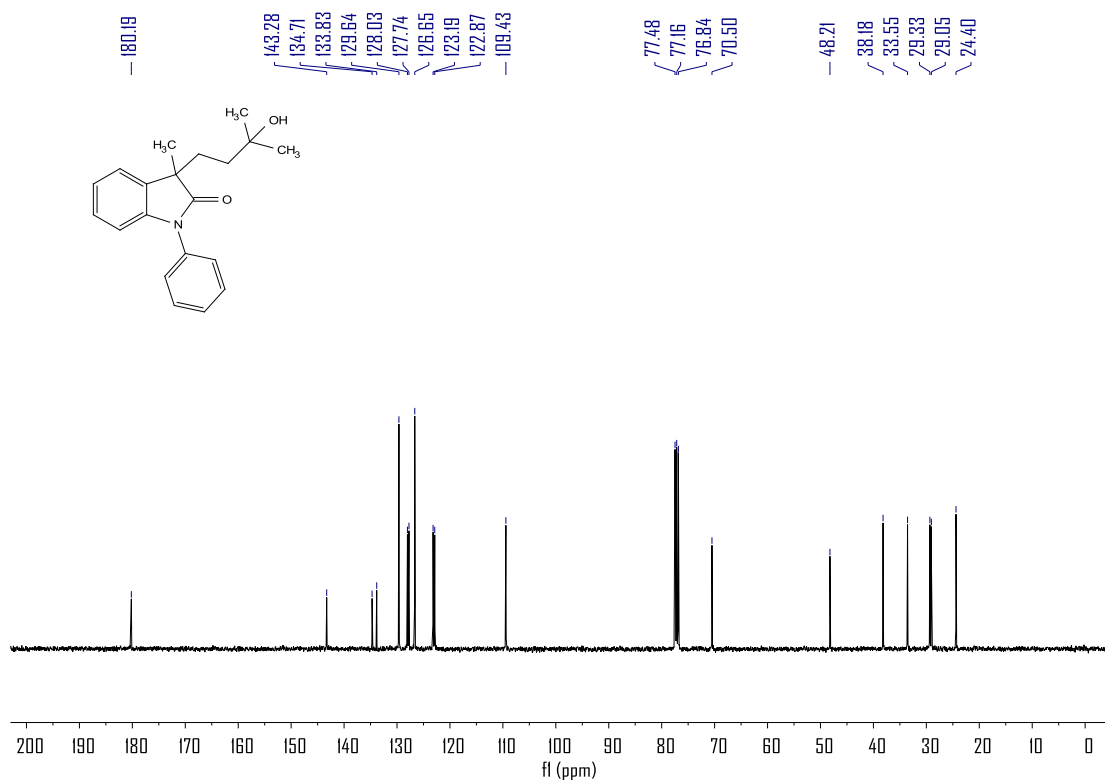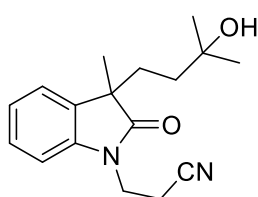

### 3-(3-(3-hydroxy-3-methylbutyl)-3-methyl-2-oxoindolin-1-yl)propanenitrile

Following the general procedure (**4r**, pale-yellow liquid, 40 mg, 70%). The residue was purified by silica gel-column chromatography using PE/EtOAc (1:1) as an eluent.  $^1\text{H}$  NMR (400 MHz, Chloroform-*d*)  $\delta$  7.31 – 7.26 (m, 1H), 7.20 (dd,  $J$  = 7.4, 1.2 Hz, 1H), 7.10 (td,  $J$  = 7.5, 0.9 Hz, 1H), 6.90 (d,  $J$  = 7.8 Hz, 1H), 4.07 (dt,  $J$  = 14.0, 6.9 Hz, 1H), 3.96 (dt,  $J$  = 14.0, 6.8 Hz, 1H), 2.76 (t,  $J$  = 6.7 Hz, 2H), 2.01 (td,  $J$  = 12.9, 4.6 Hz, 1H), 1.84 (td,  $J$  = 13.0, 4.1 Hz, 1H), 1.56 (s, 1H), 1.38 (s, 3H), 1.16 (td,  $J$  = 13.1, 4.7 Hz, 1H), 1.10 (d,  $J$  = 3.2 Hz, 6H), 0.97 (td,  $J$  = 13.0, 4.1 Hz, 1H).  $^{13}\text{C}$  NMR (101 MHz, Chloroform-*d*)  $\delta$  180.78, 141.22, 133.88, 128.04, 123.35, 123.12, 117.26, 107.94, 70.43, 48.06, 38.07, 35.80, 33.08, 29.20, 28.98, 24.16, 16.47.

**HRMS** (ESI)  $m/z$ :  $[\text{M} + \text{Na}]^+$  Calcd for  $\text{C}_{17}\text{H}_{22}\text{N}_2\text{NaO}_2$ : 309.1573; found: 309.1576.

## Supporting Information

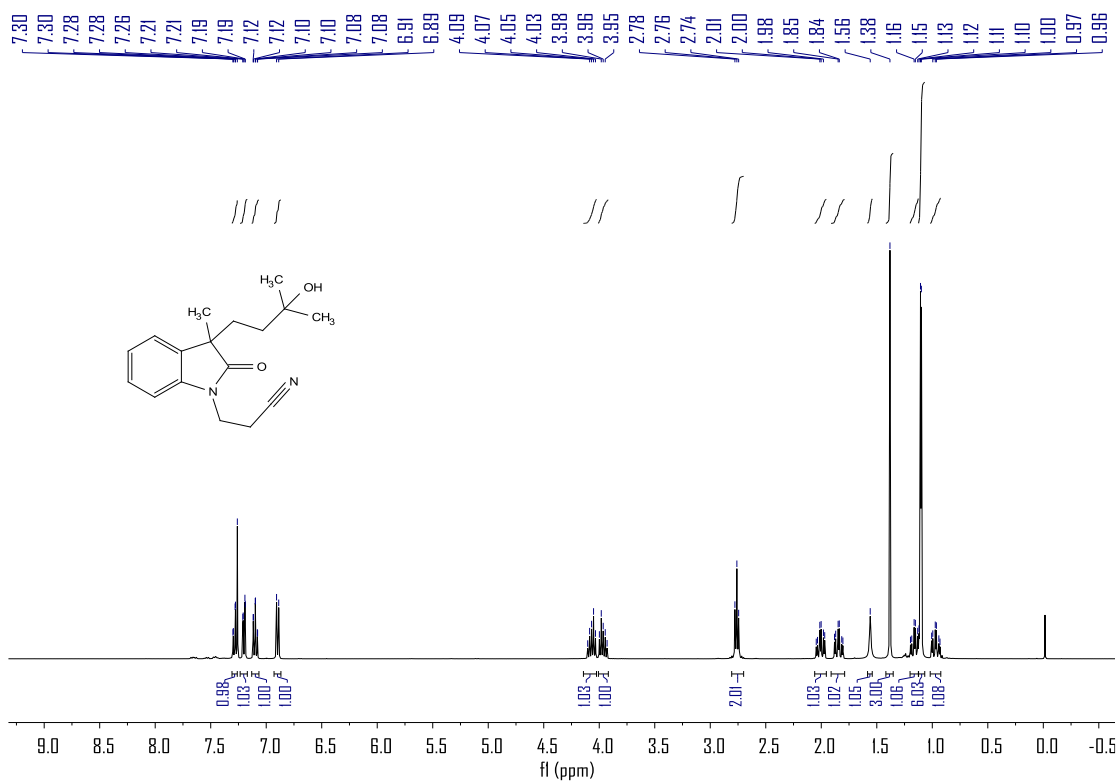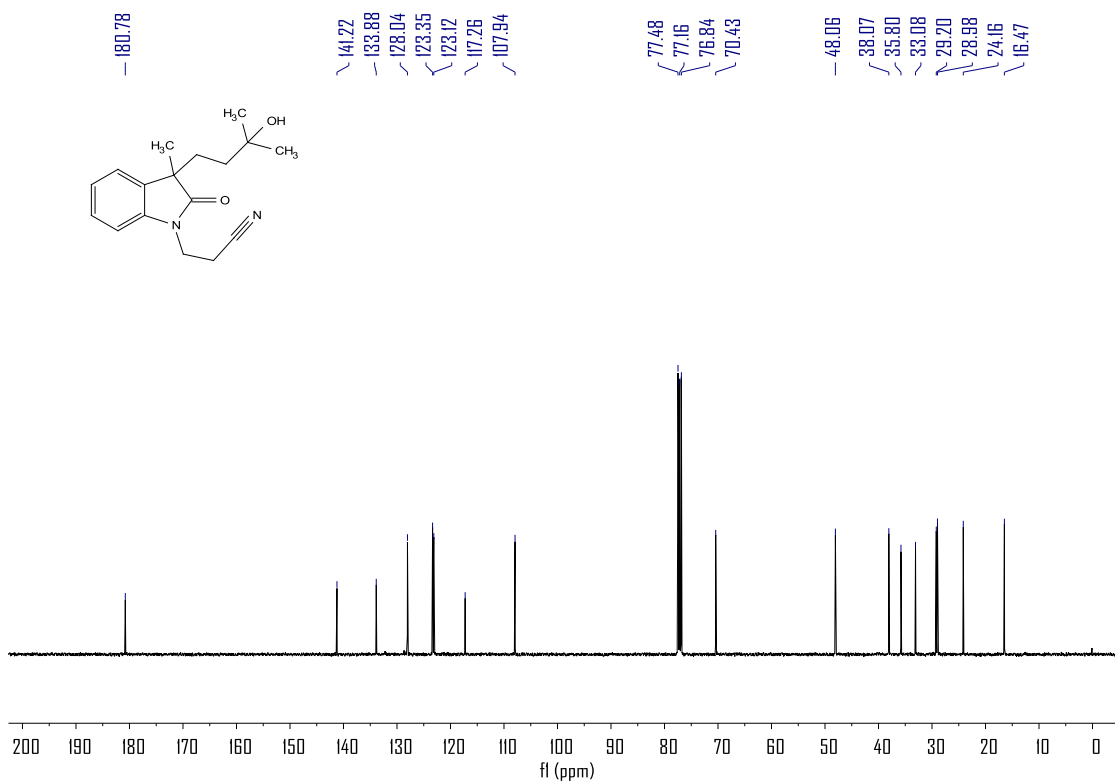

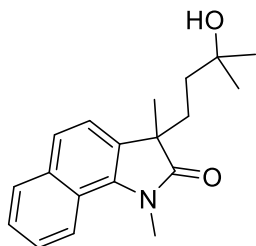

**3-(3-hydroxy-3-methylbutyl)-1,3-dimethyl-1,3-dihydro-2H-benzo[g]indol-2-one**

Following the general procedure (**4s**, pale-yellow liquid, 35 mg, 59%). The residue was purified by silica gel-column chromatography using PE/EtOAc (2:1) as an eluent.  $^1\text{H}$  NMR (400 MHz, Chloroform-*d*)  $\delta$  7.71 (dd,  $J = 8.1, 1.1$  Hz, 1H), 7.59 – 7.49 (m, 2H), 7.42 (ddd,  $J = 8.1, 4.8, 3.7$  Hz, 2H), 6.93 (dd,  $J = 7.6, 0.9$  Hz, 1H), 3.52 (s, 3H), 2.50 (td,  $J = 12.8, 4.3$  Hz, 1H), 1.99 (td,  $J = 12.9, 4.3$  Hz, 1H), 1.66 (s, 3H), 1.22 (td,  $J = 13.0, 4.2$  Hz, 1H), 1.09 (s, 7H).  $^{13}\text{C}$  NMR (101 MHz, Chloroform-*d*)  $\delta$  173.58, 138.11, 136.82, 133.38, 127.24, 126.44, 126.02, 122.69, 122.63, 119.85, 108.45, 70.60, 47.48, 39.23, 38.30, 31.98, 29.74, 29.19, 29.09.

**HRMS** (ESI)  $m/z$ :  $[\text{M} + \text{Na}]^+$  Calcd for  $\text{C}_{19}\text{H}_{23}\text{NNaO}_2$ : 320.1621; found: 320.1629.

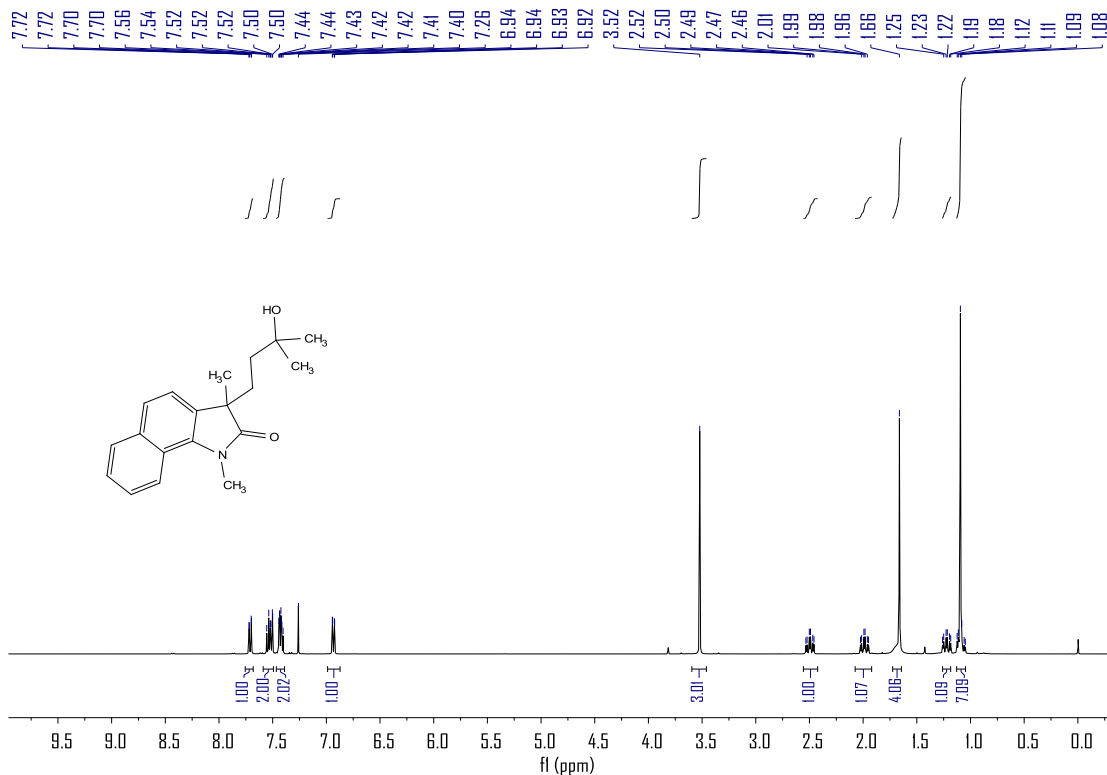

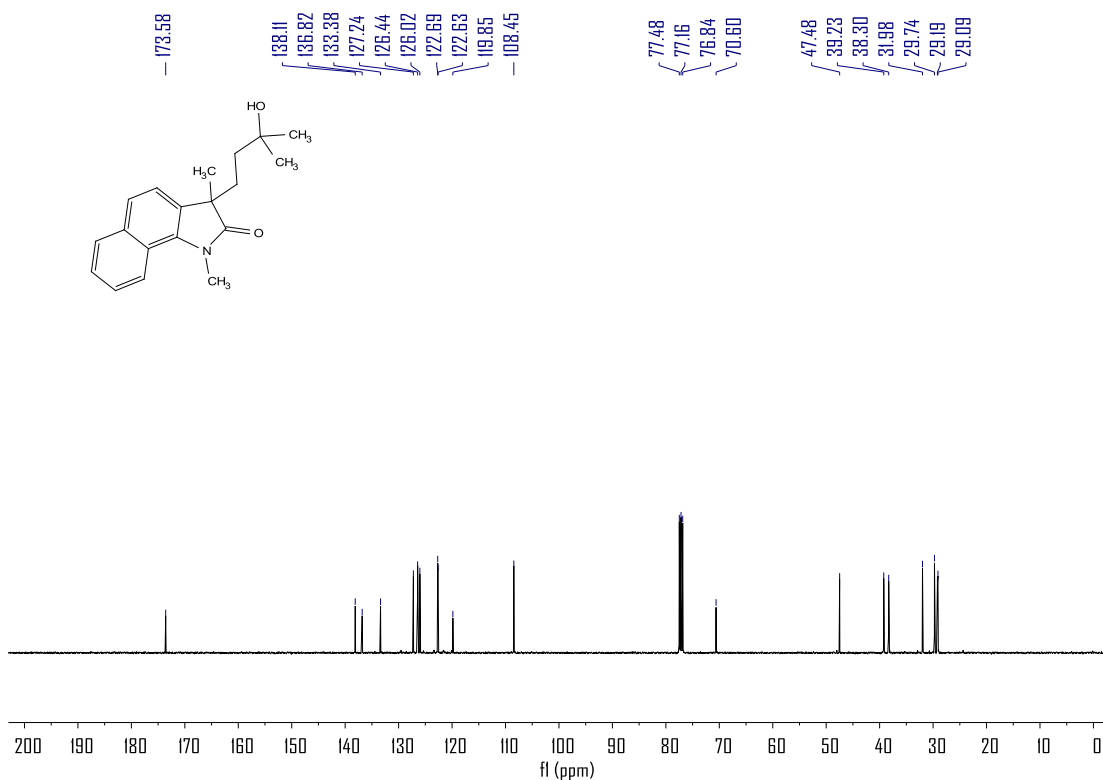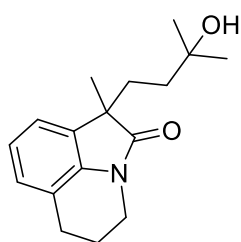

**1-(3-hydroxy-3-methylbutyl)-1-methyl-5,6-dihydro-4H-pyrrolo[3,2,1-ij]quinolin-2(1H)-one**

Following the general procedure (**4t**, pale-yellow liquid, 38 mg, 70%). The residue was purified by silica gel-column chromatography using PE/EtOAc (2:1) as an eluent. <sup>1</sup>H NMR (400 MHz, Chloroform-*d*) δ 6.99 (d, *J* = 6.6 Hz, 2H), 6.92 (dd, *J* = 8.6, 6.3 Hz, 1H), 3.75 – 3.61 (m, 2H), 2.77 (t, *J* = 6.1 Hz, 2H), 2.02 – 1.90 (m, 3H), 1.85 – 1.78 (m, 1H), 1.74 (s, 1H), 1.35 (s, 3H), 1.19 (td, *J* = 13.0, 4.7 Hz, 1H), 1.11 (d, *J* = 4.0 Hz, 6H), 1.04 (td, *J* = 12.9, 4.2 Hz, 1H). <sup>13</sup>C NMR (101 MHz, Chloroform-*d*) δ 179.61, 139.08, 132.58, 126.59, 122.08, 120.43, 120.08, 49.46, 38.80, 38.21, 32.79, 29.23, 29.04, 24.72, 23.72, 21.39.

**HRMS** (ESI) *m/z*: [M + Na]<sup>+</sup> Calcd for C<sub>17</sub>H<sub>23</sub>NNaO<sub>2</sub>: 296.1621; found: 296.1620.

## Supporting Information

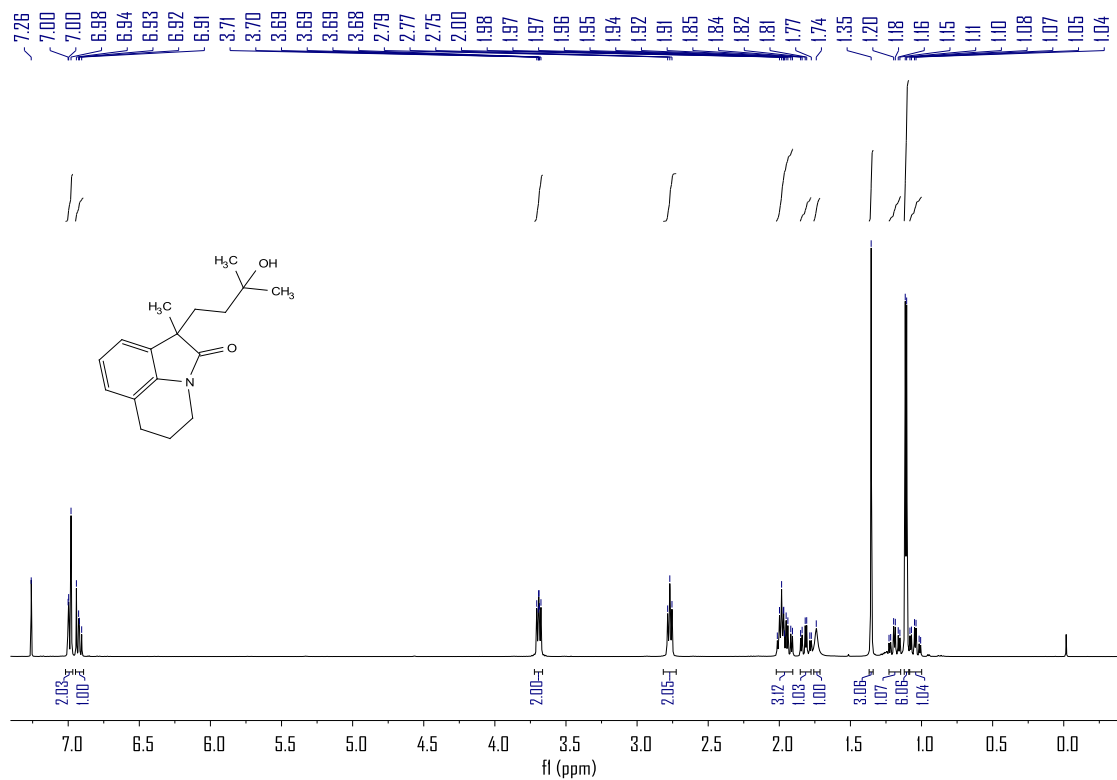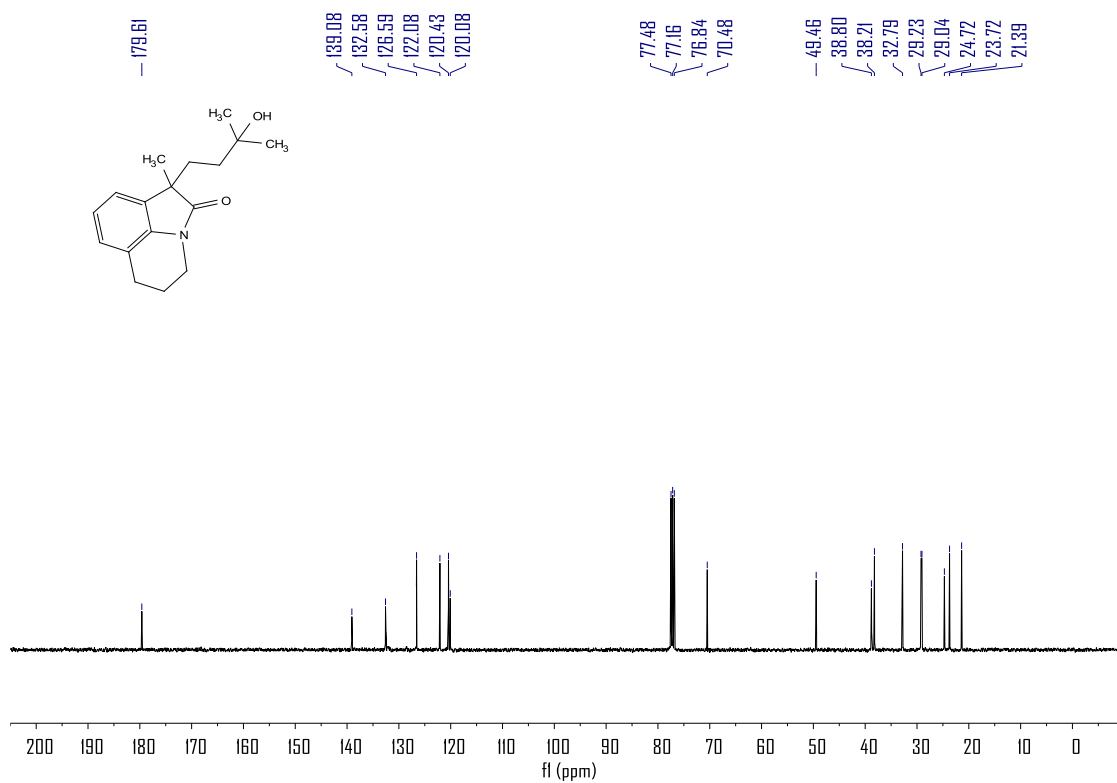



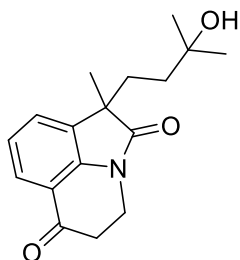

**1-(3-hydroxy-3-methylbutyl)-1-methyl-4,5-dihydro-6H-pyrrolo[3,2-ij]quinoline-2,6(1H)-dione**

Following the general procedure (**4u**, pale-yellow liquid, 37 mg, 65%). The residue was purified by silica gel-column chromatography using PE/EtOAc (1:1) as an eluent.  $^1\text{H NMR}$  (400 MHz, Chloroform-*d*)  $\delta$  7.64 (dd,  $J = 8.0, 1.1$  Hz, 1H), 7.33 (dd,  $J = 7.3, 1.1$  Hz, 1H), 7.06 (dd,  $J = 8.0, 7.2$  Hz, 1H), 4.03 (t,  $J = 7.2$  Hz, 2H), 2.83 (t,  $J = 7.2$  Hz, 2H), 2.00 (td,  $J = 13.0, 4.7$  Hz, 1H), 1.88 (td,  $J = 13.0, 4.3$  Hz, 1H), 1.64 (s, 1H), 1.41 (s, 3H), 1.20 (td,  $J = 12.9, 4.7$  Hz, 1H), 1.15 – 1.00 (m, 7H).  $^{13}\text{C NMR}$  (101 MHz, Chloroform-*d*)  $\delta$  191.73, 179.59, 146.49, 133.50, 128.30, 124.14, 122.68, 116.80, 70.37, 49.54, 38.13, 37.77, 36.25, 32.79, 29.39, 29.10, 23.56.

**HRMS (ESI) m/z:**  $[\text{M} + \text{Na}]^+$  Calcd for  $\text{C}_{17}\text{H}_{21}\text{NNaO}_3$ : 310.1414; found: 310.1416.

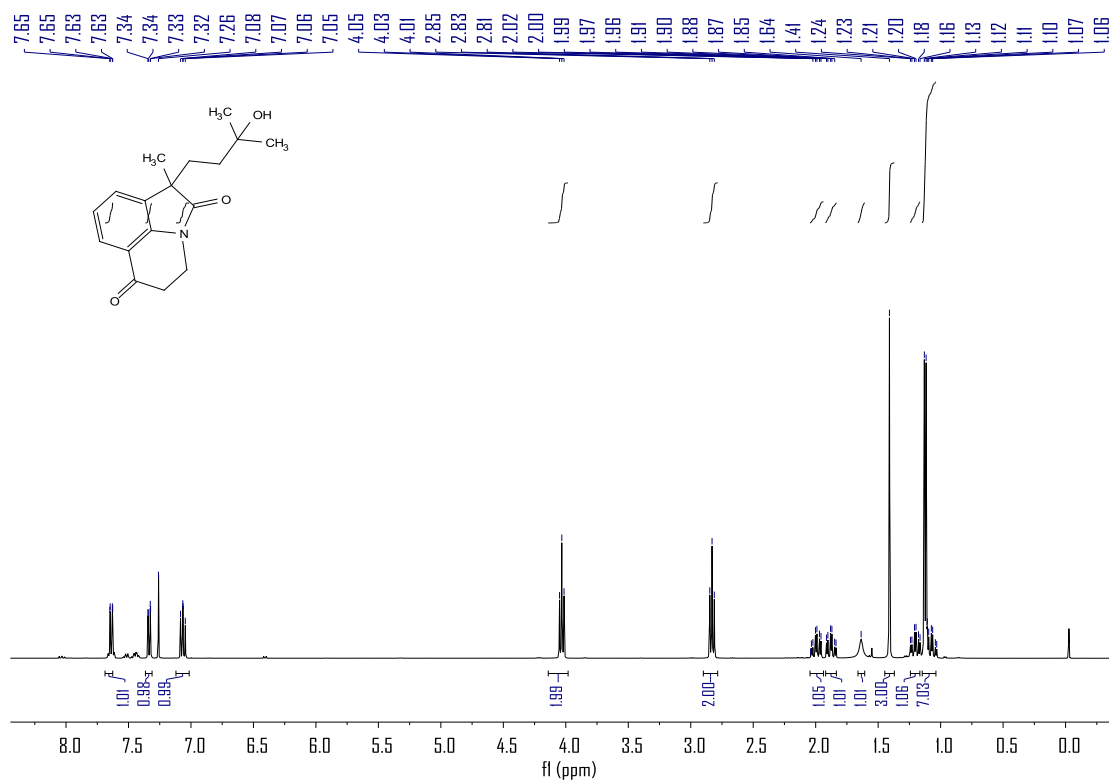

## Supporting Information

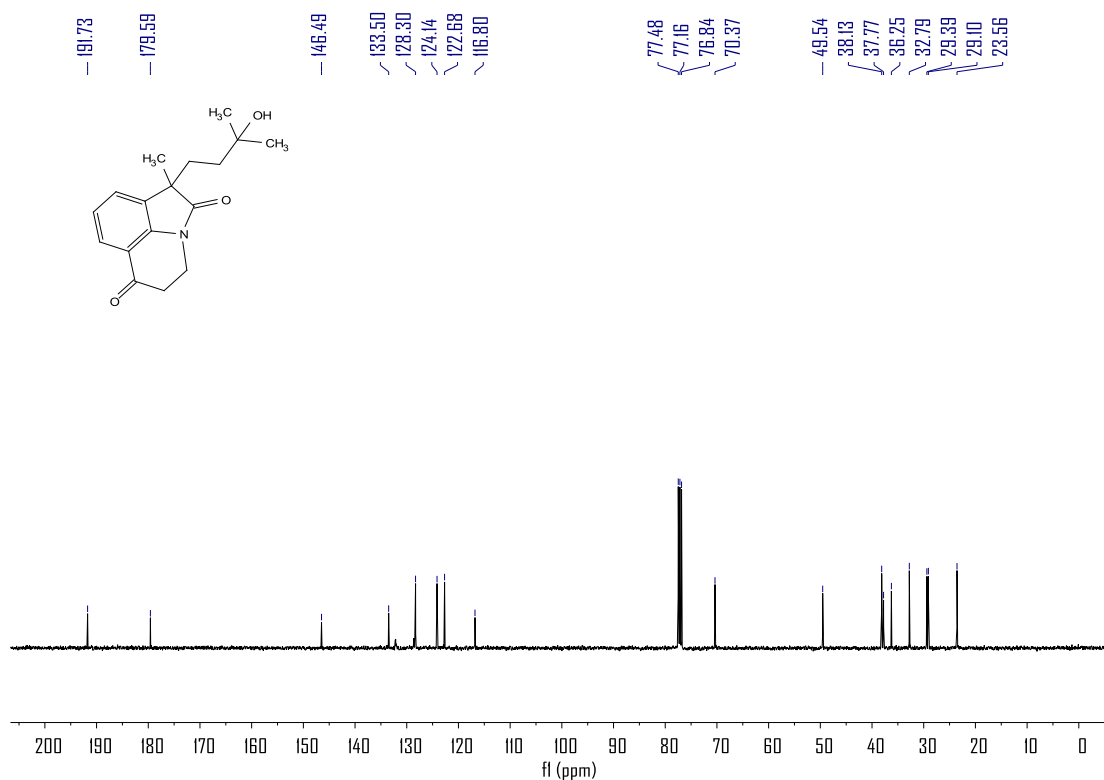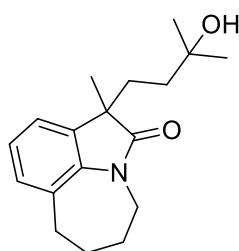

### 7-(3-hydroxy-3-methylbutyl)-7-methyl-1,2,3,4-tetrahydroazepino[3,2,1-hi]indol-6(7H)-one

Following the general procedure (**4v**, pale-yellow liquid, 39 mg, 68%). The residue was purified by silica gel-column chromatography using PE/EtOAc (2:1) as an eluent. **<sup>1</sup>H NMR** (400 MHz, Chloroform-*d*)  $\delta$  7.05 – 6.84 (m, 3H), 4.02 – 3.86 (m, 2H), 2.95 (dd,  $J = 7.5, 4.7$  Hz, 2H), 2.07 – 1.90 (m, 5H), 1.78 (td,  $J = 13.0, 4.1$  Hz, 1H), 1.69 (s, 1H), 1.34 (s, 3H), 1.19 – 1.08 (m, 7H), 0.98 (td,  $J = 13.0, 4.1$  Hz, 1H). **<sup>13</sup>C NMR** (101 MHz, Chloroform-*d*)  $\delta$  181.10, 142.02, 134.30, 129.14, 125.18, 122.48, 120.35, 70.47, 48.11, 40.78, 38.13, 33.29, 30.86, 29.23, 29.04, 26.58, 26.55, 24.34.

**HRMS** (ESI)  $m/z$ :  $[M + Na]^+$  Calcd for  $C_{18}H_{25}NNaO_2$ : 310.1778; found: 310.1783.

## Supporting Information

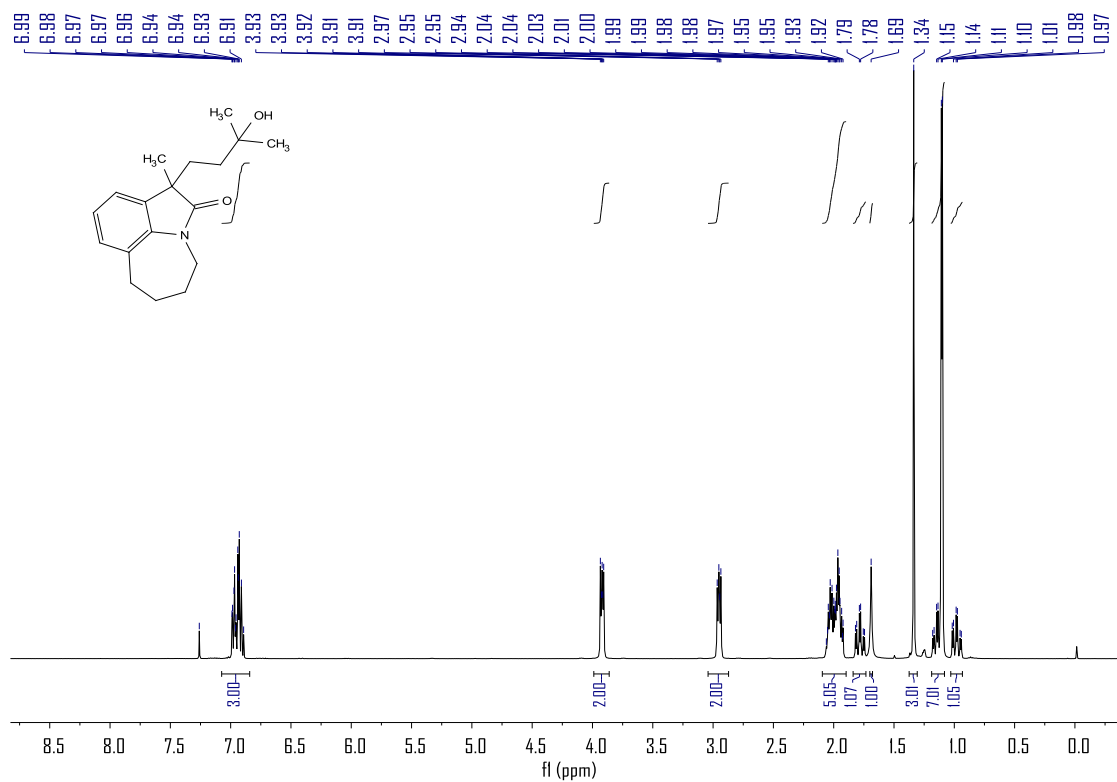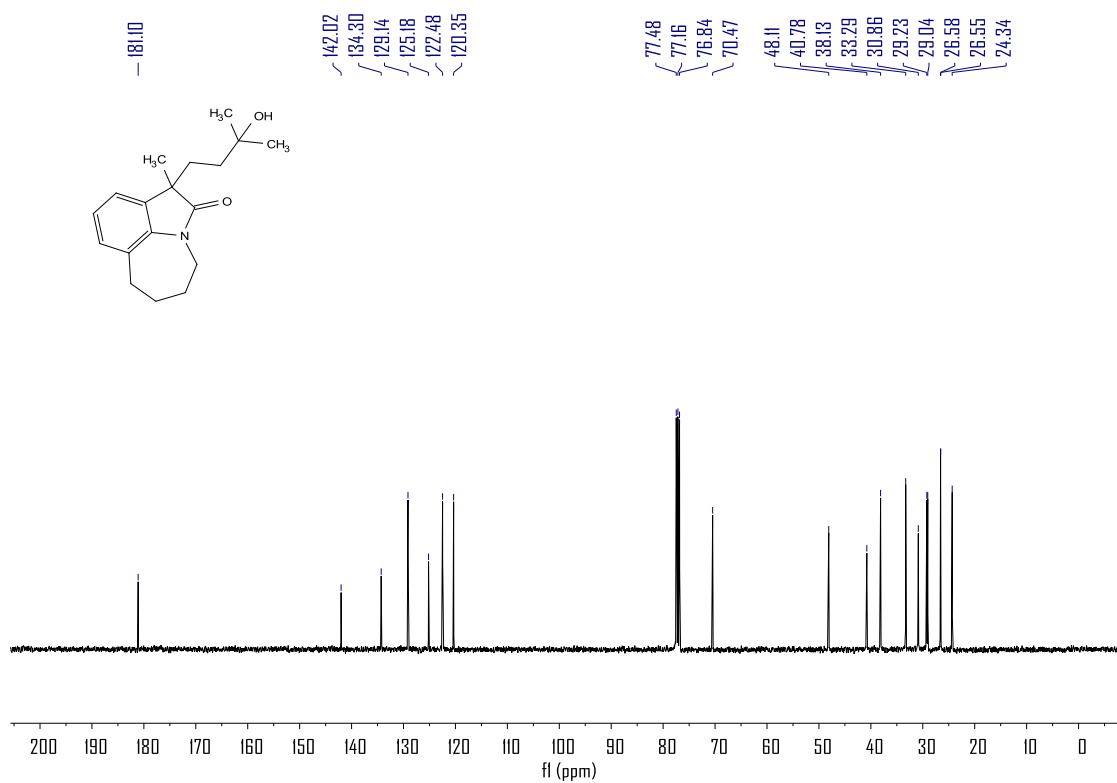

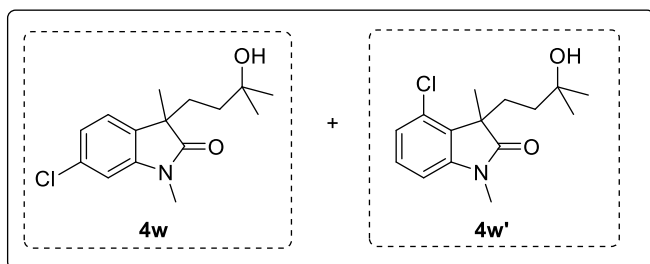

**6-chloro-3-(3-hydroxy-3-methylbutyl)-1,3-dimethylindolin-2-one**

and

**4-chloro-3-(3-hydroxy-3-methylbutyl)-1,3-dimethylindolin-2-one**

Following the general procedure (**4w**:**4w'** = **3.3**:**1**, pale-yellow liquid, 49 mg, 88%). The residue was purified by silica gel-column chromatography using PE/EtOAc (2:1) as an eluent. <sup>1</sup>H NMR (400 MHz, Chloroform-*d*) δ 7.24 – 6.92 (m, 2H), 6.86 – 6.66 (m, 1H), 3.17 (d, *J* = 6.2 Hz, 3H), 2.31 (td, *J* = 13.2, 4.2 Hz, 1H), 1.97 (td, *J* = 13.0, 4.4 Hz, 1H), 1.47 (s, 2.29H), 1.32 (s, 0.70H), 1.13 – 1.06 (m, 6H), 0.98 (td, *J* = 13.1, 4.4 Hz, 1H), 0.89 – 0.80 (m, 1H). <sup>13</sup>C NMR (101 MHz, Chloroform-*d*) δ 180.65, 180.03, 145.09, 144.51, 133.49, 132.32, 130.51, 129.54, 129.11, 123.71, 123.45, 122.46, 108.84, 106.62, 70.45, 70.31, 50.05, 47.93, 38.62, 37.96, 32.85, 30.27, 29.24, 29.13, 29.00, 28.82, 26.47, 26.32, 23.99, 21.74.

**HRMS** (ESI) *m/z*: [M + Na]<sup>+</sup> Calcd for C<sub>15</sub>H<sub>20</sub>ClNNaO<sub>2</sub>: 304.1075; found: 304.1078.

# Supporting Information

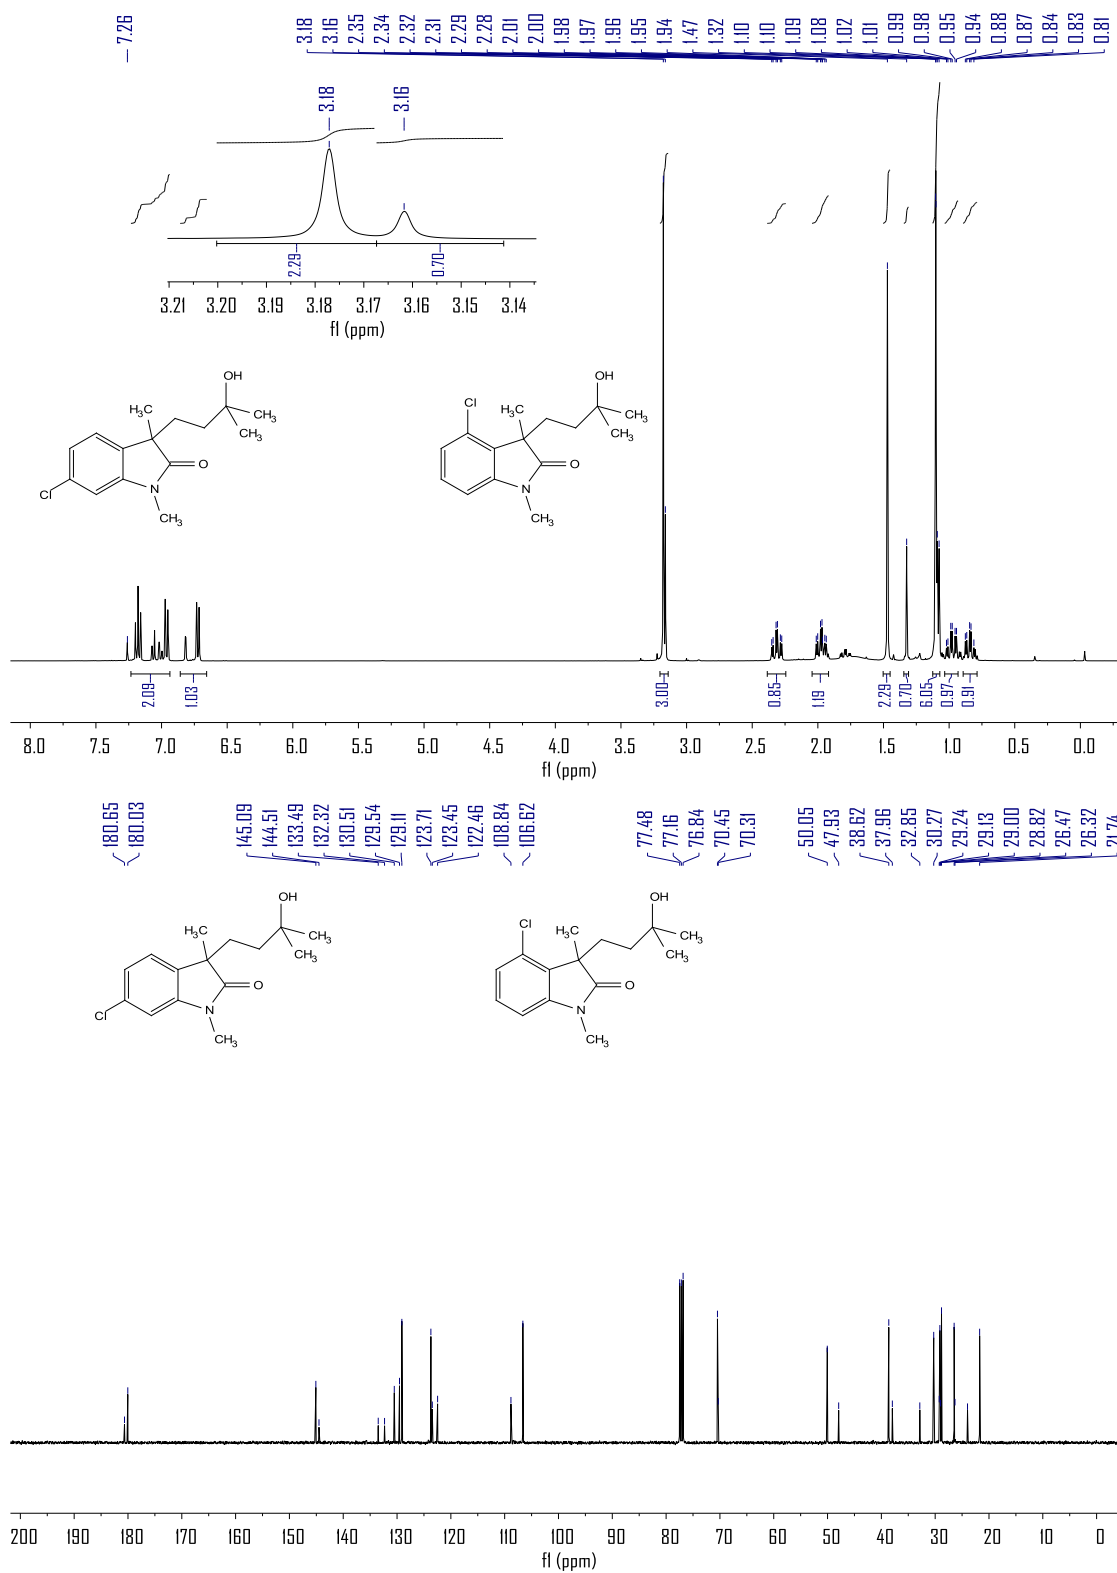

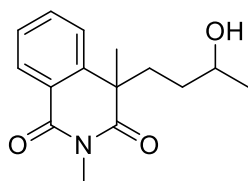

#### 4-(3-hydroxybutyl)-2,4-dimethylisoquinoline-1,3(2H,4H)-dione

Following the general procedure (**5a**, pale-yellow liquid, 42 mg, 81%, *d.r.* = 1.3:1). The residue was purified by silica gel-column chromatography using PE/EtOAc (2:1) as an eluent. <sup>1</sup>H NMR (400 MHz, Chloroform-*d*) δ 8.23 (dd, *J* = 8.3, 1.5 Hz, 1H), 7.75 – 7.58 (m, 2H), 7.42 (t, *J* = 7.2 Hz, 2H), 3.60 (dtd, *J* = 10.2, 6.5, 5.2 Hz, 1H), 3.36 (d, *J* = 1.2 Hz, 3H), 2.44 (td, *J* = 12.9, 4.5 Hz, 0.57H), 2.36 – 2.28 (m, 0.42H), 2.09 (td, *J* = 12.8, 4.3 Hz, 0.41H), 1.89 (td, *J* = 12.9, 4.5 Hz, 0.57H), 2.36 – 2.28 (m, 0.42H), 2.09 (td, *J* = 12.8, 4.3 Hz, 0.41H), 1.89 (td, *J* = 12.9, 4.5 Hz, 0.57H), 1.63 – 1.58 (m, 4H), 1.10 – 0.98 (m, 4H), 0.95 – 0.83 (m, 1H). <sup>13</sup>C NMR (101 MHz, Chloroform-*d*) δ 176.94, 176.73, 164.53, 143.58, 143.49, 134.29, 134.20, 128.98, 127.47, 125.35, 125.26, 125.06, 125.01, 67.65, 47.64, 47.61, 45.17, 38.93, 34.69, 34.65, 33.17, 31.57, 29.99, 29.55, 27.27, 23.67, 23.33.

HRMS (ESI) *m/z*: [M + Na]<sup>+</sup> Calcd for C<sub>15</sub>H<sub>19</sub>NNaO<sub>3</sub>: 284.1257; found: 284.1266.

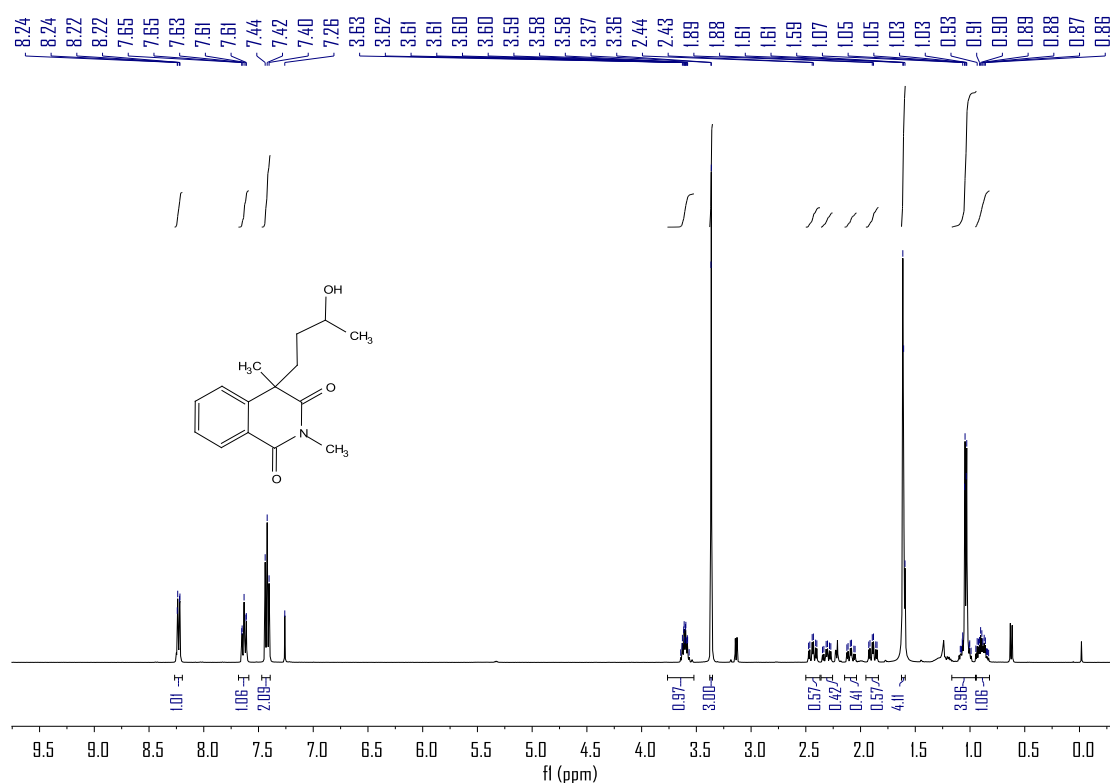

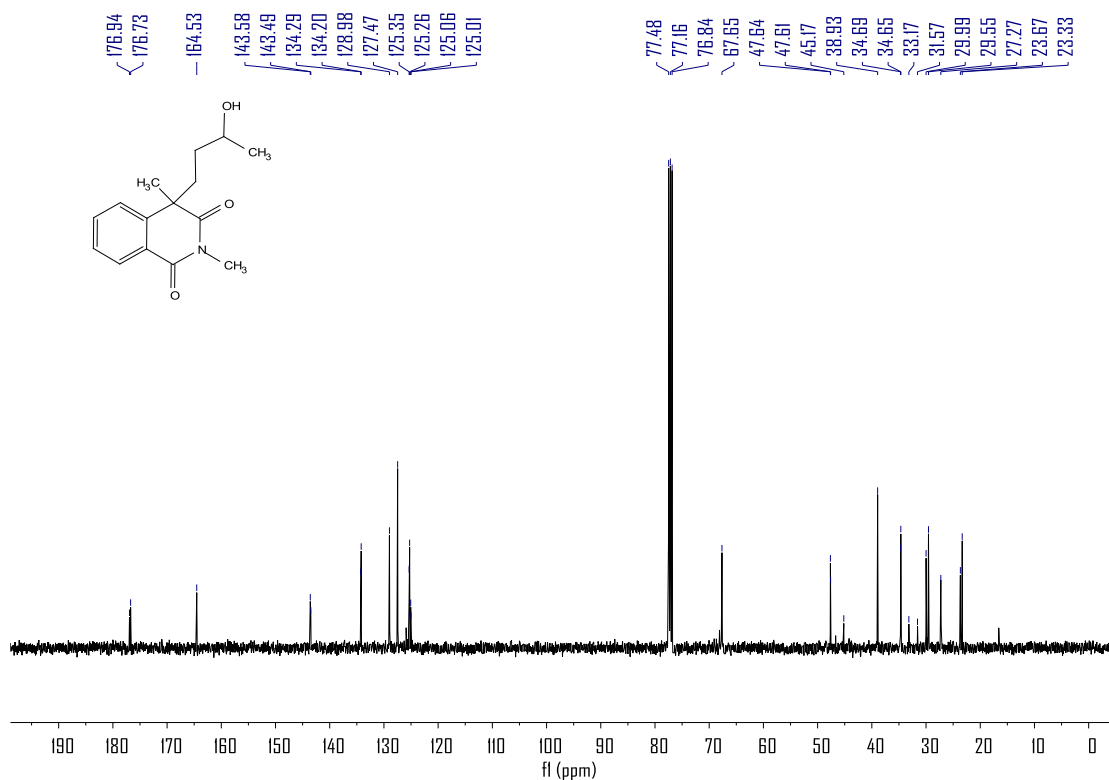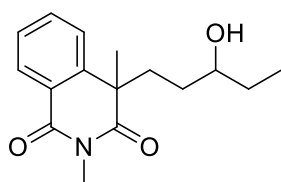

#### 4-(3-hydroxybutyl)-2,4-dimethylisoquinoline-1,3(2H,4H)-dione

Following the general procedure (**5b**, pale-yellow liquid, 48 mg, 88%, *d.r.* = 1.1:1). The residue was purified by silica gel-column chromatography using PE/EtOAc (2:1) as an eluent. <sup>1</sup>H NMR (400 MHz, Chloroform-*d*) δ 8.23 (dd, *J* = 8.2, 1.5 Hz, 1H), 7.63 (ddd, *J* = 8.3, 7.3, 1.5 Hz, 1H), 7.42 (ddd, *J* = 7.8, 5.8, 3.1 Hz, 2H), 3.41 – 3.25 (m, 4H), 2.46 (td, *J* = 12.8, 4.8 Hz, 0.5H), 2.33 (dd, *J* = 13.2, 4.9 Hz, 0.5H), 2.12 (td, *J* = 12.9, 4.3 Hz, 0.5H), 1.90 (td, *J* = 12.9, 4.8 Hz, 0.5H), 1.61 (d, *J* = 2.5 Hz, 4H), 1.39 – 1.22 (m, 2H), 1.12 – 0.71 (m, 5H). <sup>13</sup>C NMR (101 MHz, Chloroform-*d*) δ 176.95, 176.75, 164.56, 143.64, 143.54, 134.27, 134.17, 128.96, 127.45, 125.37, 125.27, 125.07, 125.01, 72.83, 47.69, 47.65, 38.80, 32.39, 32.31, 30.18, 29.97, 29.80, 29.54, 27.24, 9.86, 9.79.

**HRMS** (ESI) *m/z*: [M + Na]<sup>+</sup> Calcd for C<sub>16</sub>H<sub>21</sub>NNaO<sub>3</sub>: 298.1414; found: 298.1421.

## Supporting Information

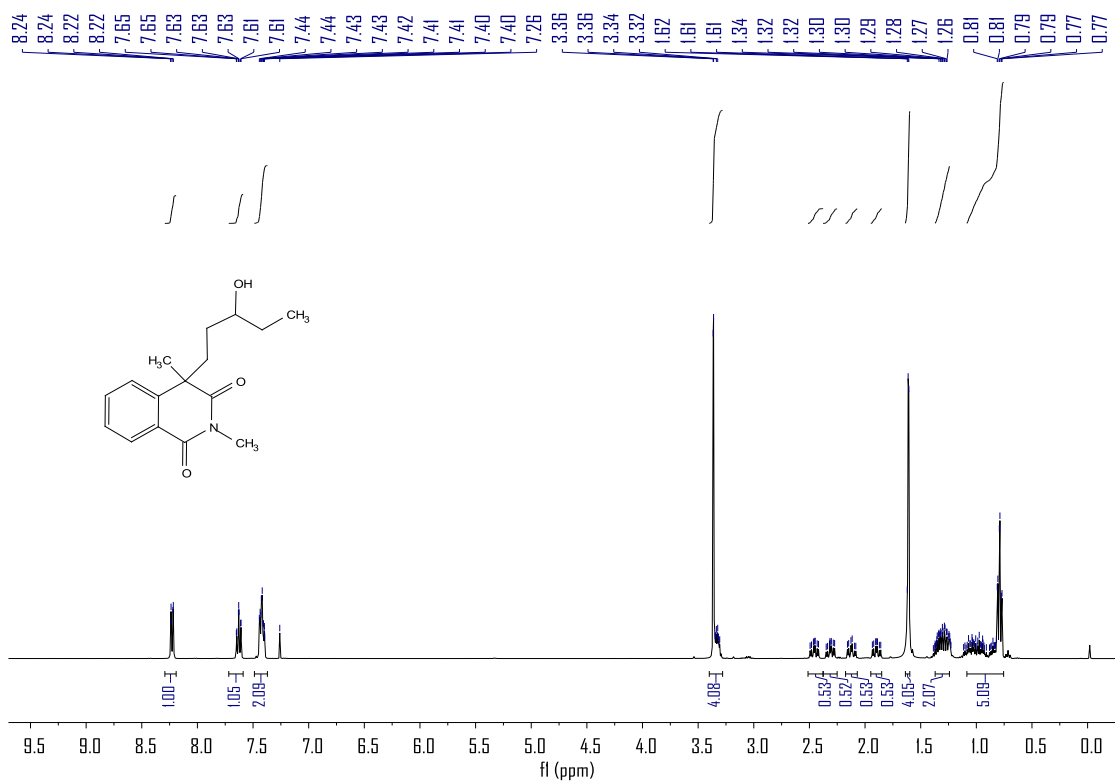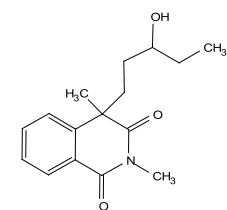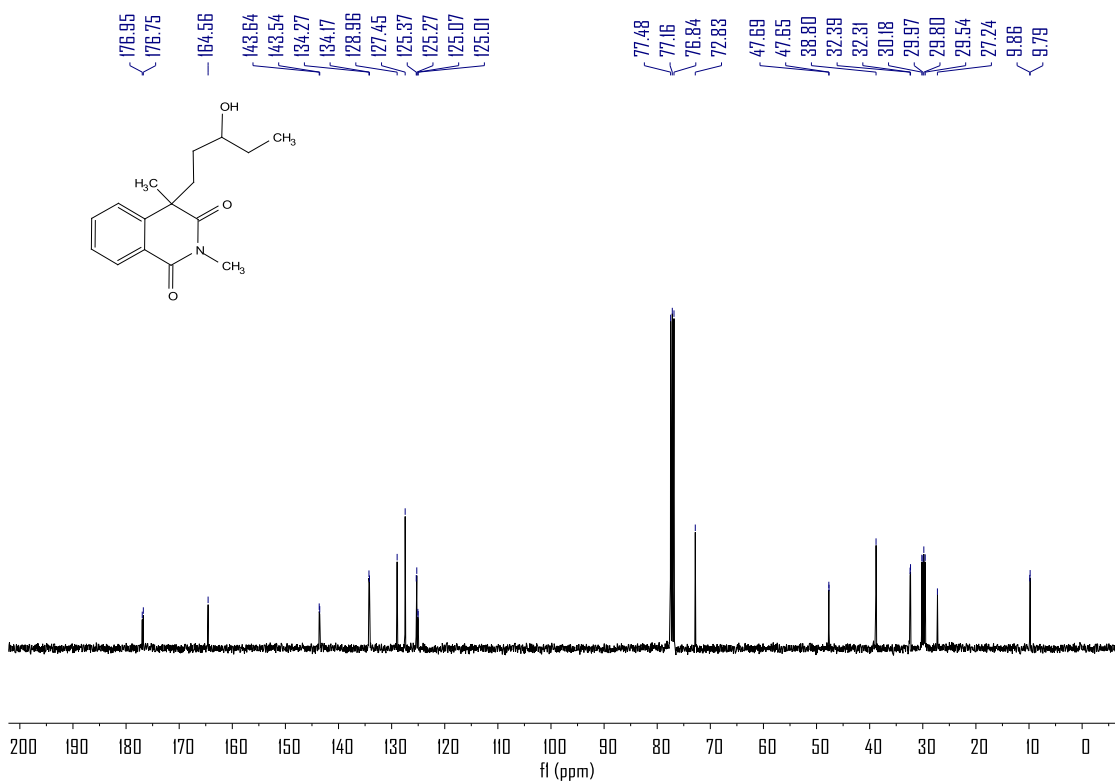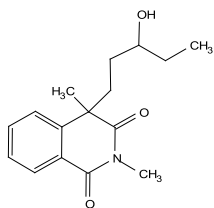



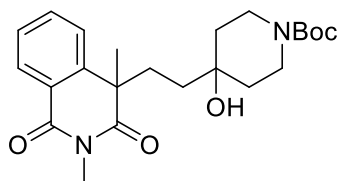

**Tert-butyl 4-(2-(2,4-dimethyl-1,3-dioxo-1,2,3,4-tetrahydroisoquinolin-4-yl)ethyl)-4-hydroxypiperidine-1-carboxylate**

Following the general procedure (**5c**, pale-yellow liquid, 54 mg, 65%). The residue was purified by silica gel-column chromatography using PE/EtOAc (2:1) as an eluent.  $^1\text{H NMR}$  (400 MHz, Chloroform-*d*)  $\delta$  8.27 (dd,  $J = 7.9, 1.4$  Hz, 1H), 7.67 (td,  $J = 7.6, 1.5$  Hz, 1H), 7.50 – 7.43 (m, 2H), 3.71 (d,  $J = 12.9$  Hz, 2H), 3.40 (s, 3H), 3.18 – 3.08 (m, 2H), 2.45 (td,  $J = 12.9, 4.4$  Hz, 1H), 2.05 (td,  $J = 13.0, 4.2$  Hz, 1H), 1.64 (s, 3H), 1.45 (s, 14H), 1.09 (td,  $J = 13.1, 4.4$  Hz, 1H), 0.90 (td,  $J = 13.2, 4.2$  Hz, 1H).  $^{13}\text{C NMR}$  (101 MHz, Chloroform-*d*)  $\delta$  176.72, 164.46, 154.82, 143.36, 134.34, 129.08, 127.59, 125.13, 125.08, 79.54, 69.32, 47.61, 39.77, 39.65, 38.19, 36.61, 35.50, 30.32, 28.55, 27.30.

**HRMS** (ESI)  $m/z$ :  $[\text{M} + \text{Na}]^+$  Calcd for  $\text{C}_{23}\text{H}_{32}\text{N}_2\text{NaO}_5$ : 439.2203; found: 439.2207.

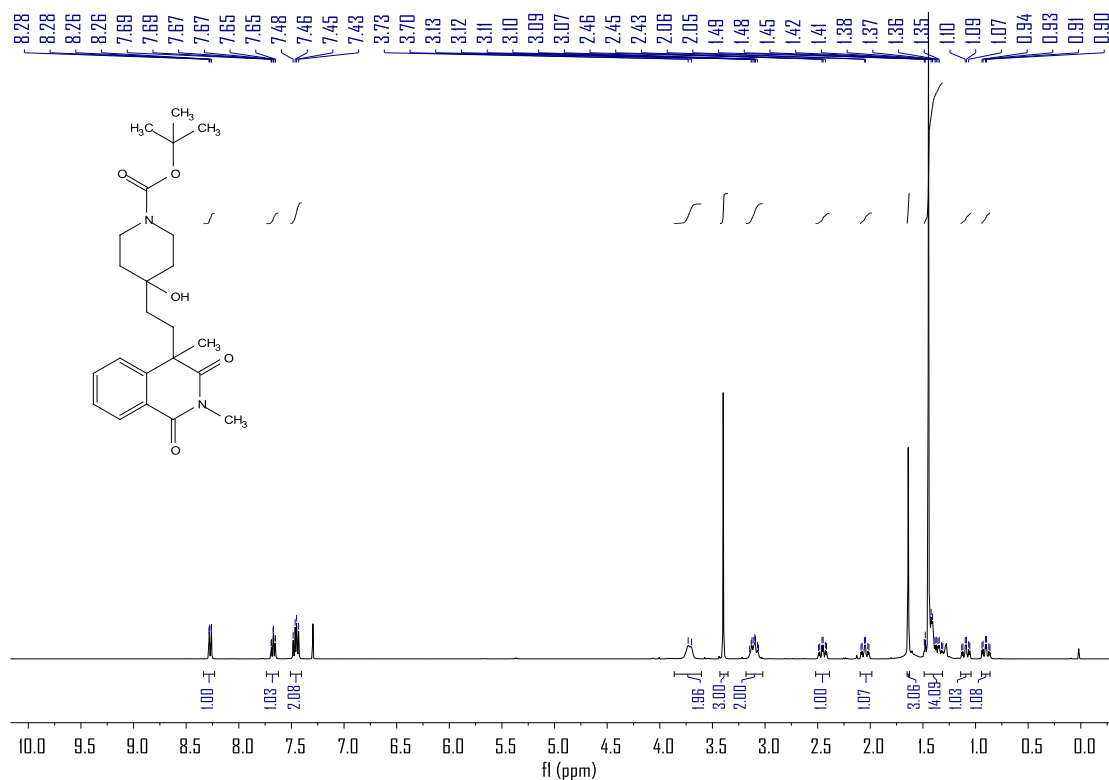

## Supporting Information

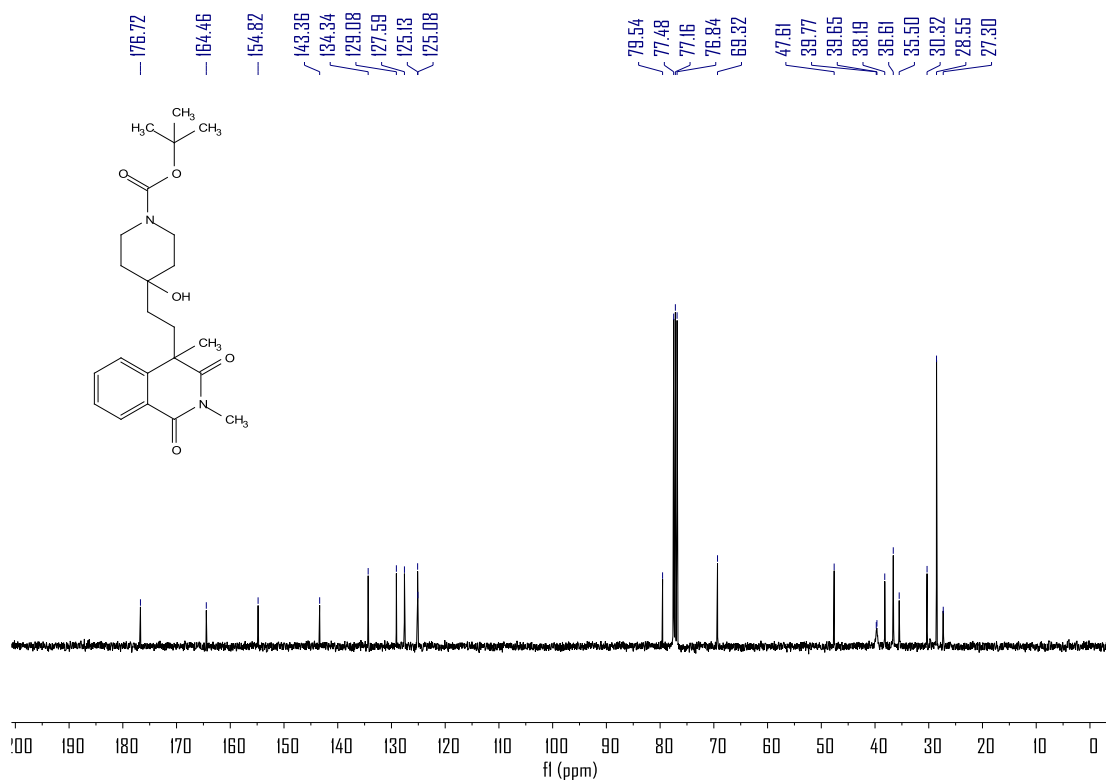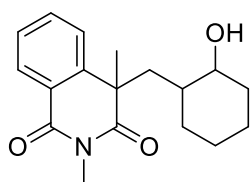

### 4-((2-hydroxycyclohexyl)methyl)-2,4-dimethylisoquinoline-1,3(2H,4H)-dione

Following the general procedure (**major isomer 1, 5d**, pale-yellow liquid, 34 mg). The residue was purified by silica gel-column chromatography using PE/EtOAc (2:1) as an eluent. **<sup>1</sup>H NMR** (400 MHz, Chloroform-*d*)  $\delta$  8.25 (dd,  $J = 8.1, 1.5$  Hz, 1H), 7.62 (td,  $J = 7.6, 1.5$  Hz, 1H), 7.42 (ddd,  $J = 8.1, 4.5, 3.1$  Hz, 2H), 3.37 (s, 3H), 3.09 (td,  $J = 9.7, 4.3$  Hz, 1H), 2.72 (dd,  $J = 14.5, 4.4$  Hz, 1H), 1.83 (dd,  $J = 14.6, 5.3$  Hz, 2H), 1.68 (s, 1H), 1.59 – 1.52 (m, 4H), 1.39 – 1.32 (m, 1H), 1.15 – 1.04 (m, 2H), 1.02 – 0.93 (m, 1H), 0.89 – 0.71 (m, 3H). **<sup>13</sup>C NMR** (101 MHz, Chloroform-*d*)  $\delta$  177.73, 164.69, 144.14, 133.70, 129.09, 127.34, 125.85, 124.88, 74.42, 47.75, 45.79, 42.62, 35.54, 32.97, 31.82, 27.38, 27.35, 25.47, 24.49.

**HRMS** (ESI)  $m/z$ :  $[M + Na]^+$  Calcd for  $C_{18}H_{23}NNaO_3$ : 324.1570; found: 324.1576.

## Supporting Information

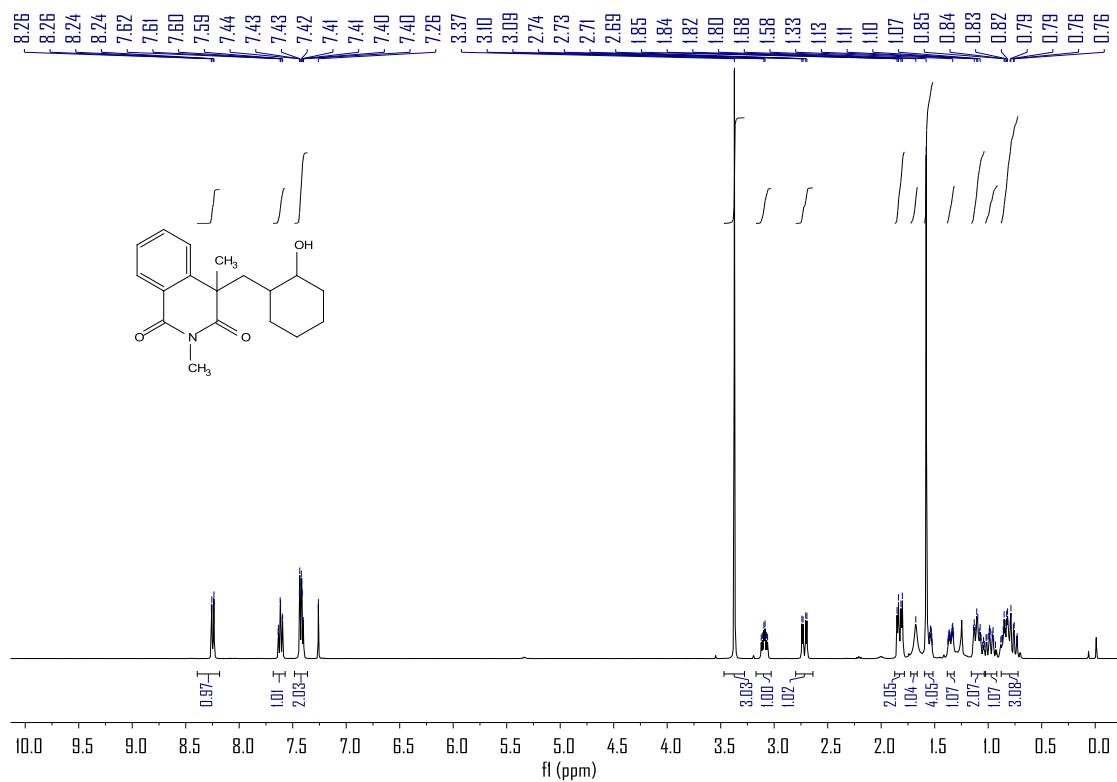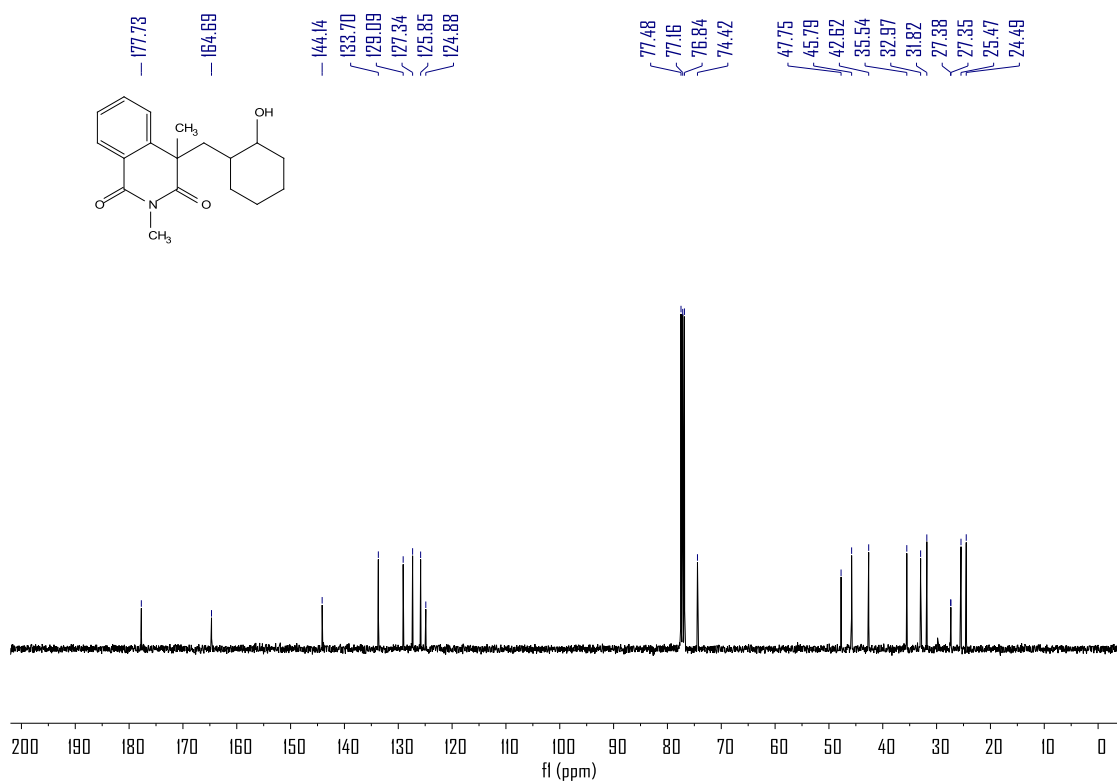

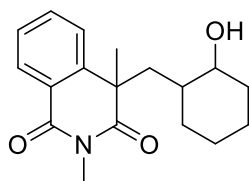

#### 4-((2-hydroxycyclohexyl)methyl)-2,4-dimethylisoquinoline-1,3(2H,4H)-dione

Following the general procedure (**isomer 2:3 = 2.3:1**, **5d**, pale-yellow liquid, 21 mg). The residue was purified by silica gel-column chromatography using PE/EtOAc (2:1) as an eluent.  $^1\text{H NMR}$  (400 MHz, Chloroform-*d*)  $\delta$  8.25 (dt,  $J = 8.0, 1.5$  Hz, 1H), 7.63 (tt,  $J = 7.5, 1.7$  Hz, 1H), 7.54 – 7.36 (m, 2H), 3.40 – 3.33 (m, 3H), 3.21 (dt,  $J = 6.1, 2.8$  Hz, 0.3H), 3.07 (ddd,  $J = 13.1, 9.0, 4.3$  Hz, 0.7H), 2.63 (dd,  $J = 14.2, 1.9$  Hz, 0.7H), 2.36 – 2.30 (m, 0.3H), 2.28 – 2.14 (m, 1H), 1.62 – 1.53 (m, 4H), 1.51 – 1.38 (m, 2H), 1.26 – 0.77 (m, 7H).  $^{13}\text{C NMR}$  (101 MHz, Chloroform-*d*)  $\delta$  177.37, 176.84, 164.58, 143.88, 143.61, 134.04, 133.96, 128.96, 127.46, 127.35, 126.22, 125.96, 124.84, 124.78, 74.24, 70.13, 47.00, 46.41, 43.92, 43.71, 42.44, 38.56, 35.91, 32.58, 32.01, 31.03, 30.55, 27.37, 27.27, 25.46, 24.59, 24.29, 20.61.

**HRMS (ESI) m/z:**  $[\text{M} + \text{Na}]^+$  Calcd for  $\text{C}_{18}\text{H}_{23}\text{NNaO}_3$ : 324.1570; found: 324.1572.

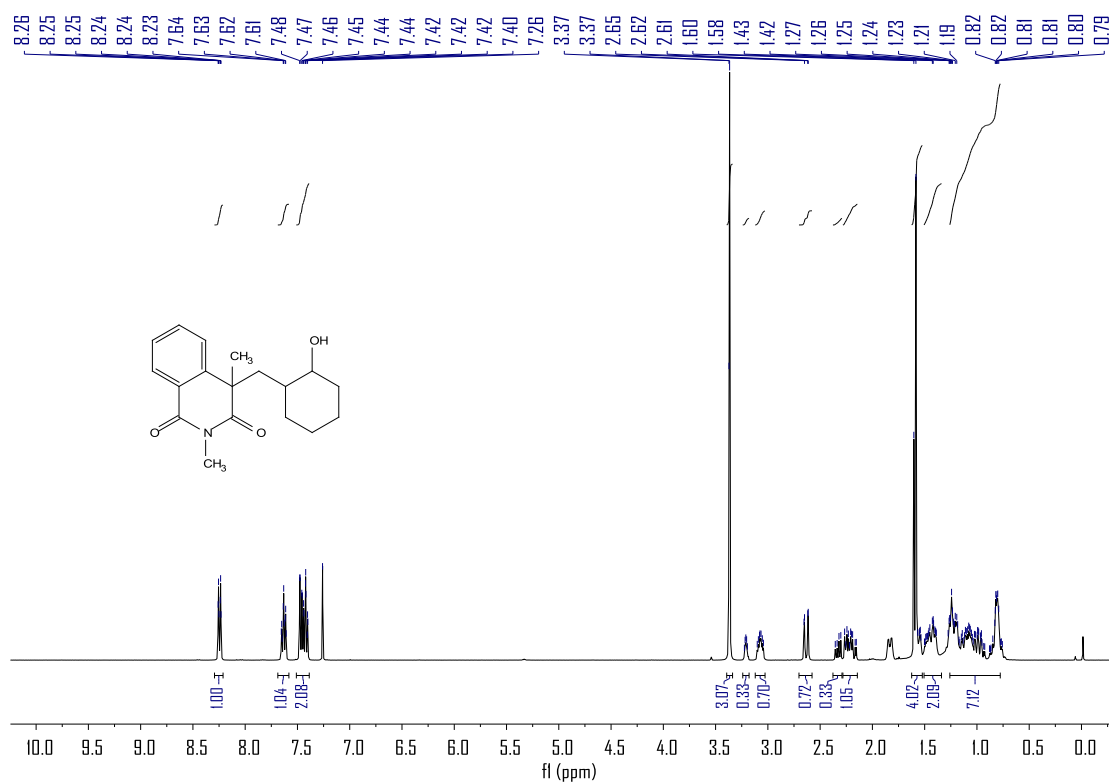

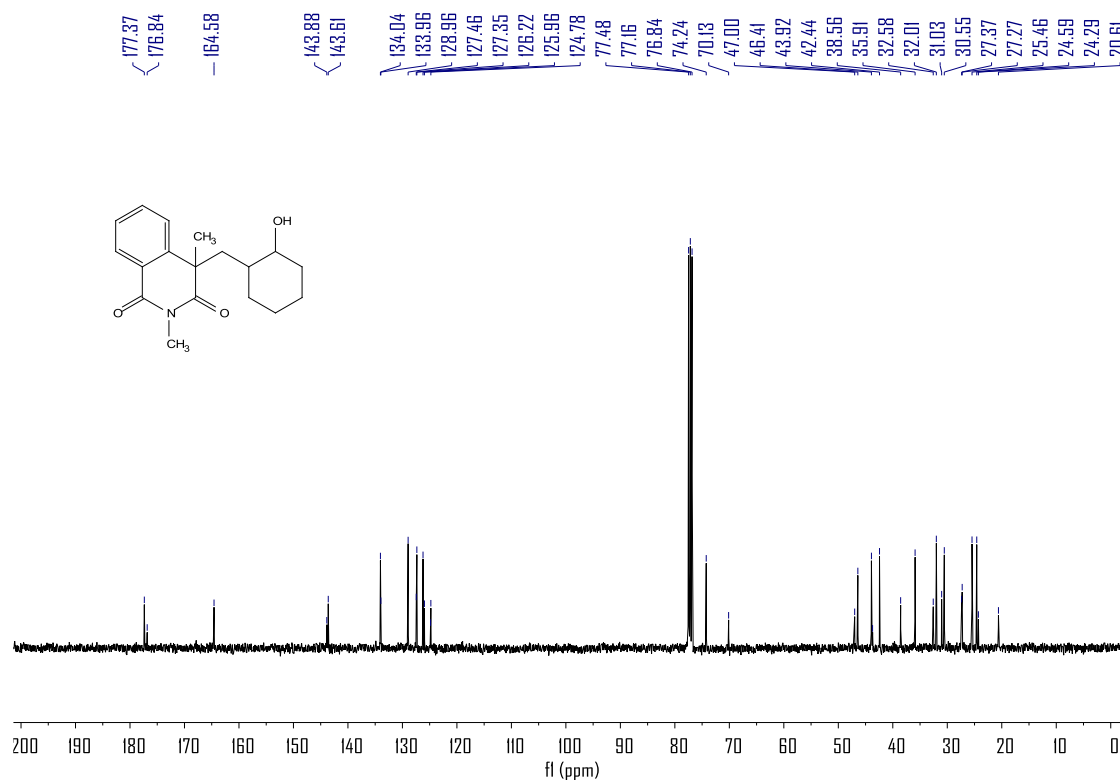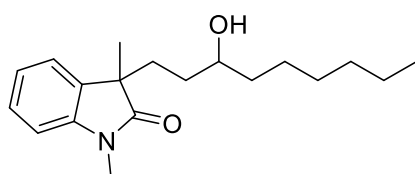

### 3-(3-hydroxyonyl)-1,3-dimethylindolin-2-one

Following the general procedure (**5e**, pale-yellow liquid, 53 mg, 88%, *d.r.* = 1.2:1). The residue was purified by silica gel-column chromatography using PE/EtOAc (2:1) as an eluent.  $^1\text{H NMR}$  (400 MHz, Chloroform-*d*)  $\delta$  7.27 (td,  $J = 7.6, 1.2$  Hz, 1H), 7.19 (d,  $J = 7.2$  Hz, 1H), 7.07 (td,  $J = 7.6, 1.0$  Hz, 1H), 6.85 (dd,  $J = 7.8, 1.2$  Hz, 1H), 3.42 (ddd,  $J = 10.2, 5.3, 2.6$  Hz, 1H), 3.22 (d,  $J = 1.4$  Hz, 3H), 2.13 – 2.05 (m, 0.45H), 2.00 – 1.94 (m, 1H), 1.88 (s, 1H), 1.78 (ddd,  $J = 13.4, 11.5, 5.2$  Hz, 0.55H), 1.38 (s, 1H), 1.35 – 0.96 (m, 12H), 0.90 – 0.84 (m, 3H).  $^{13}\text{C NMR}$  (101 MHz, Chloroform-*d*)  $\delta$  180.98, 180.78, 143.32, 143.29, 134.16, 133.98, 127.79, 122.70, 122.62, 122.54, 108.03, 71.68, 71.49, 48.25, 48.19, 37.37, 37.16, 34.32, 34.28, 32.30, 32.19, 31.84, 31.82, 29.33, 29.29, 26.20, 25.62, 25.53, 24.21, 23.81, 22.65, 14.12.

**HRMS** (ESI)  $m/z$ :  $[\text{M} + \text{Na}]^+$  Calcd for  $\text{C}_{19}\text{H}_{29}\text{NNaO}_2$ : 326.2091; found: 326.2092.

## Supporting Information

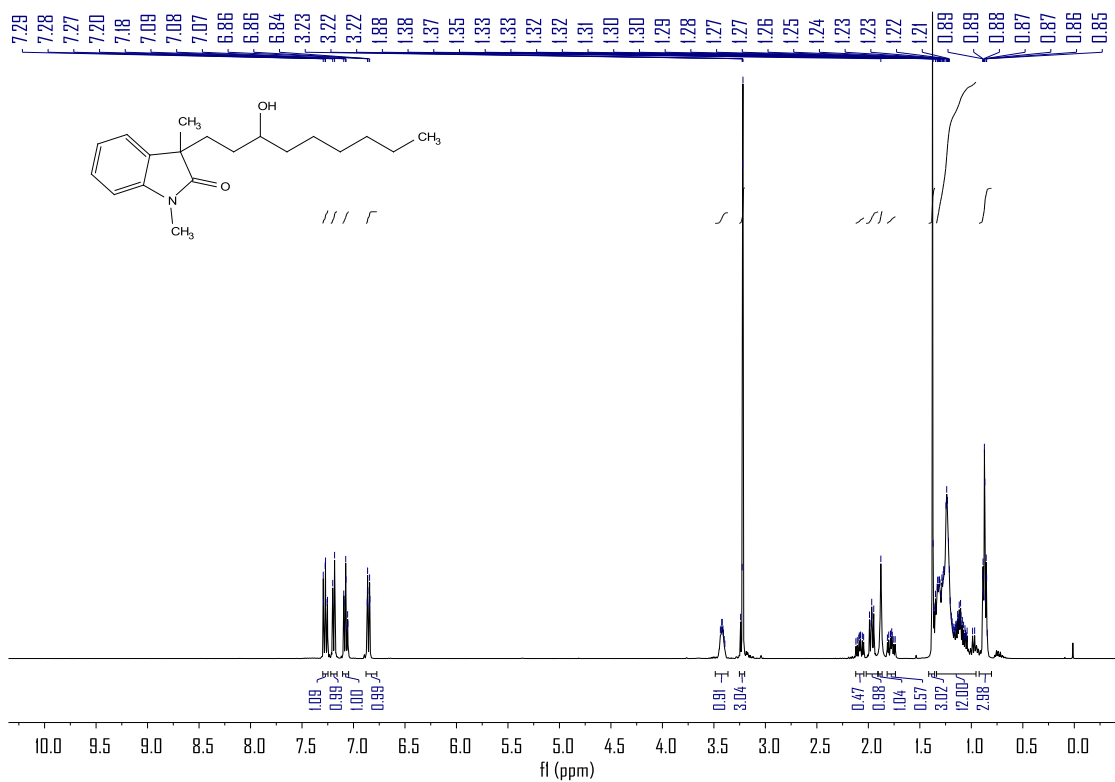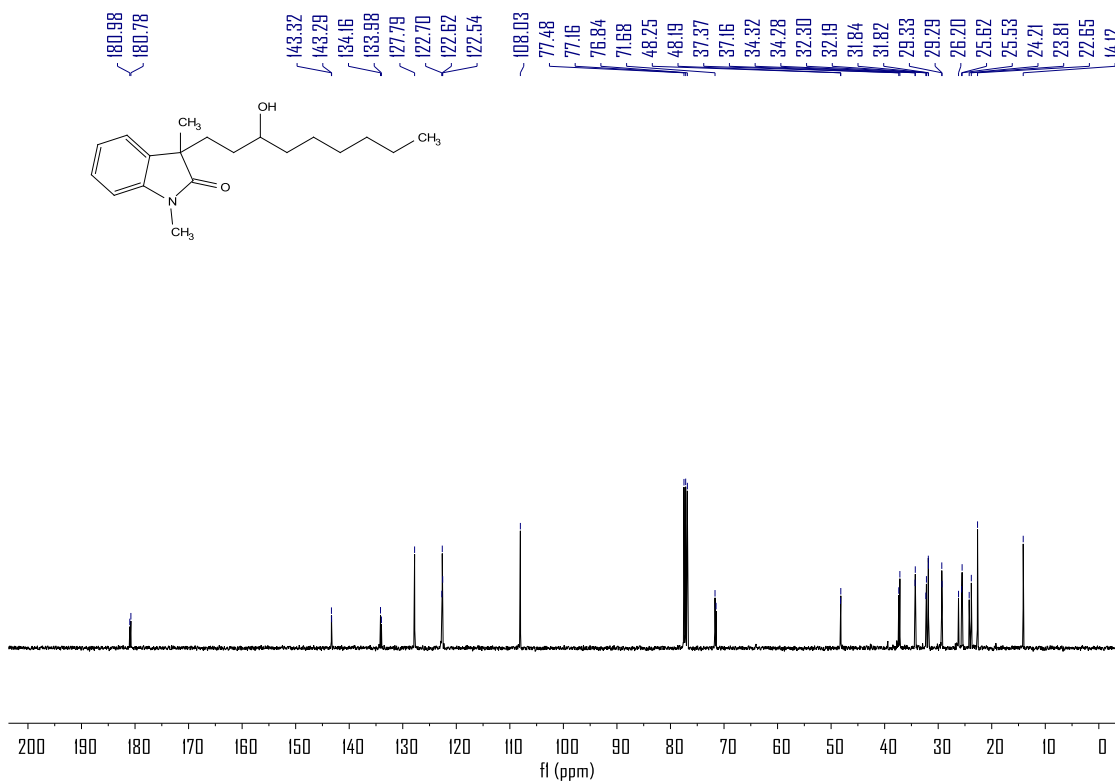

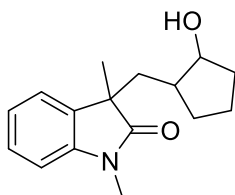

### 3-((2-hydroxycyclopentyl)methyl)-1,3-dimethylindolin-2-one

Following the general procedure (**isomer 1:2:3 = 1:1.5:2.5**, **5f**, pale-yellow liquid, 44 mg, 85%).

The residue was purified by silica gel-column chromatography using PE/EtOAc (2:1) as an eluent.  $^1\text{H NMR}$  (400 MHz, Chloroform-*d*)  $\delta$  7.30 – 7.13 (m, 2H), 7.10 – 7.03 (m, 1H), 6.84 (dd,  $J = 7.8, 2.6$  Hz, 1H), 3.73 – 3.66 (m, 0.2H), 3.57 (q,  $J = 6.5$  Hz, 0.5H), 3.44 – 3.37 (m, 0.3H), 3.24 – 3.16 (m, 3H), 2.27 – 1.71 (m, 4H), 1.56 – 1.06 (m, 9H).  $^{13}\text{C NMR}$  (101 MHz, Chloroform-*d*)  $\delta$  181.29, 181.04, 143.37, 143.26, 143.13, 134.65, 134.43, 134.35, 132.25, 132.15, 132.03, 128.66, 128.54, 128.02, 127.90, 122.87, 122.76, 122.64, 122.58, 122.48, 108.20, 108.16, 79.46, 74.54, 48.65, 48.26, 48.09, 45.33, 45.19, 42.65, 42.47, 42.43, 37.60, 34.67, 34.24, 34.05, 31.92, 30.74, 29.43, 26.35, 25.17, 25.09, 24.79, 21.86, 21.75, 21.45.

**HRMS** (ESI)  $m/z$ :  $[\text{M} + \text{Na}]^+$  Calcd for  $\text{C}_{16}\text{H}_{21}\text{NNaO}_2$ : 282.1465; found: 282.1470.

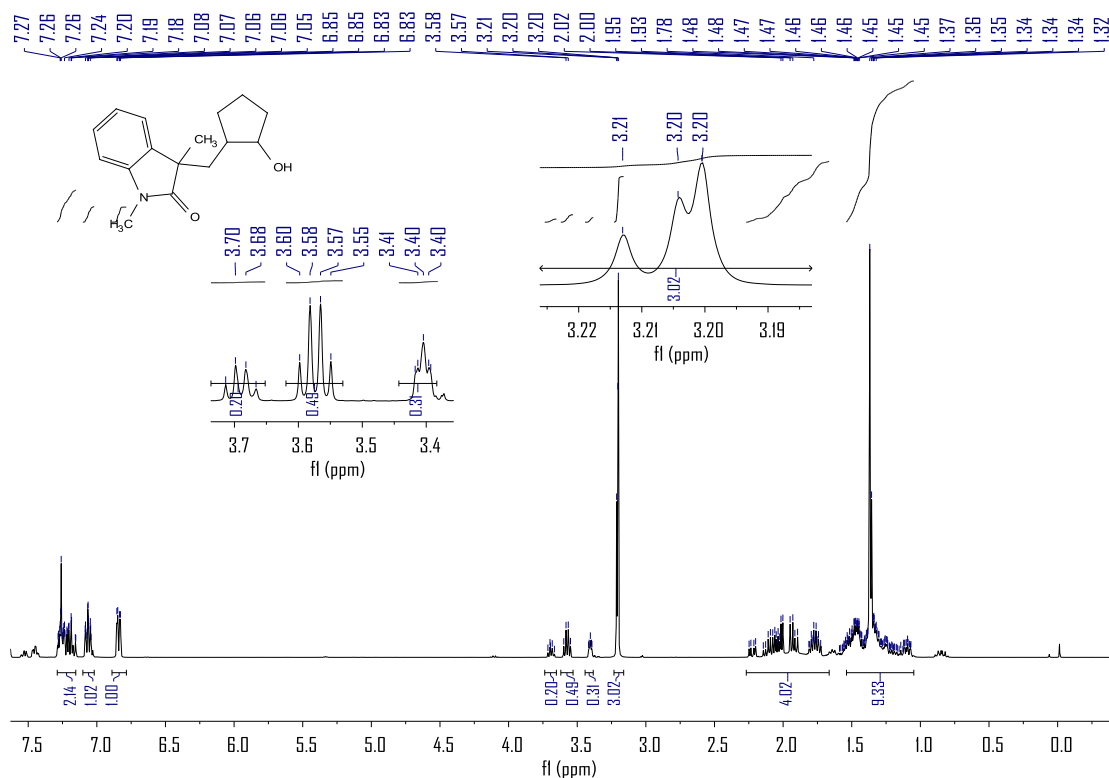

## Supporting Information

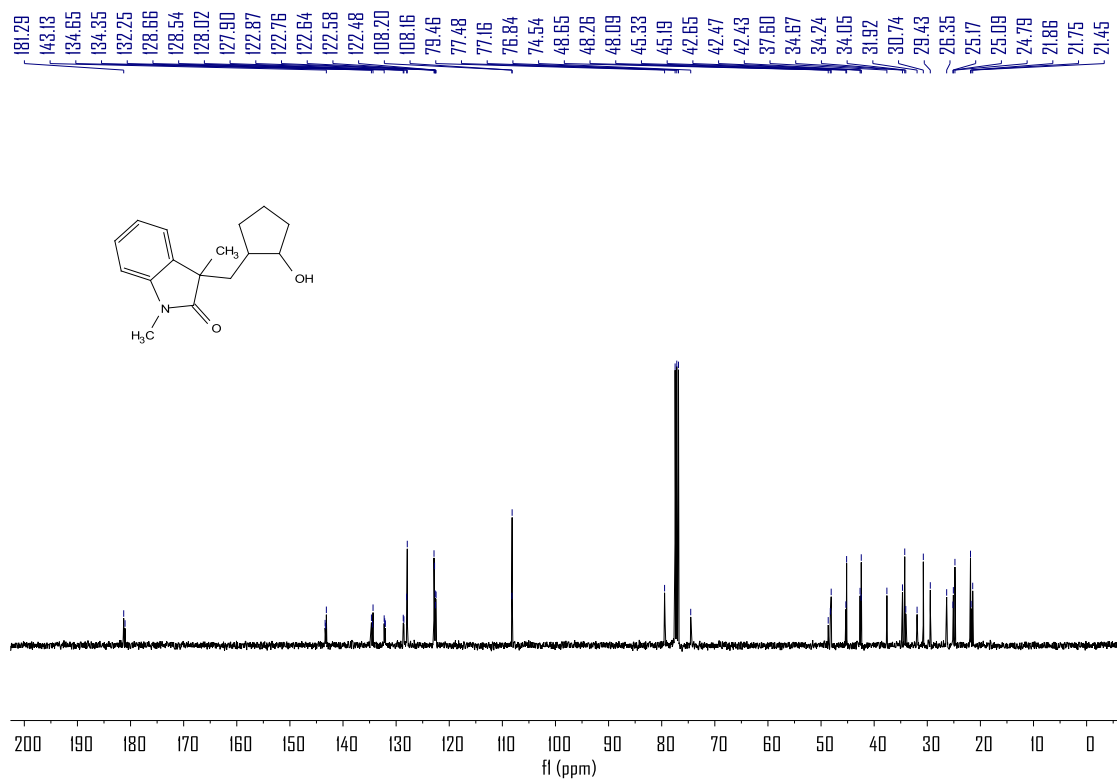



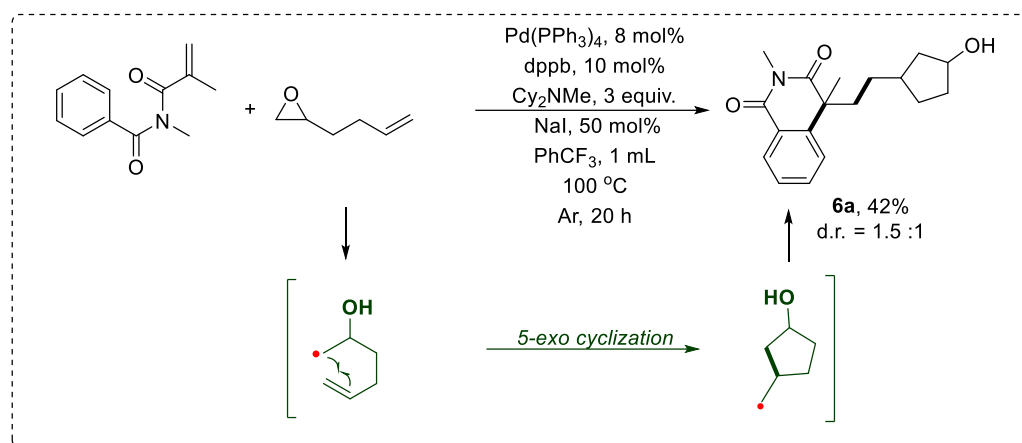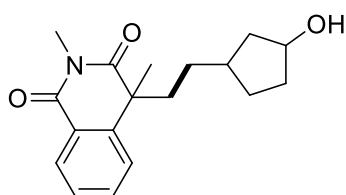

#### 4-(2-(3-hydroxycyclopentyl)ethyl)-2,4-dimethylisoquinoline-1,3(2H,4H)-dione

Following the general procedure (**6a**, pale-yellow liquid, 25 mg, 42%,  $d.r. = 1.5:1$ ). The residue was purified by silica gel-column chromatography using PE/EtOAc (2:1) as an eluent.  $^1\text{H NMR}$  (400 MHz, Chloroform- $d$ )  $\delta$  8.23 (dd,  $J = 7.8, 1.4$  Hz, 1H), 7.63 (tt,  $J = 7.7, 1.7$  Hz, 1H), 7.47 – 7.36 (m, 2H), 4.30 – 4.11 (m, 1H), 3.37 (s, 3H), 2.34 – 2.22 (m, 1H), 2.08 – 1.77 (m, 3H), 1.72 – 1.47 (m, 7H), 1.21 – 0.68 (m, 4H).  $^{13}\text{C NMR}$  (101 MHz, Chloroform- $d$ )  $\delta$  176.84, 176.79, 164.63, 143.83, 143.79, 134.15, 128.90, 127.37, 125.23, 125.07, 73.60, 73.56, 47.85, 42.44, 42.40, 42.36, 42.27, 42.24, 42.21, 42.07, 38.38, 37.36, 37.35, 35.44, 35.39, 35.18, 35.05, 32.01, 31.48, 30.31, 30.26, 30.11, 30.00, 29.46, 27.22.

**HRMS** (ESI)  $m/z$ :  $[\text{M} + \text{Na}]^+$  Calcd for  $\text{C}_{18}\text{H}_{23}\text{NNaO}_3$ : 324.1570; found: 324.1575.

## Supporting Information

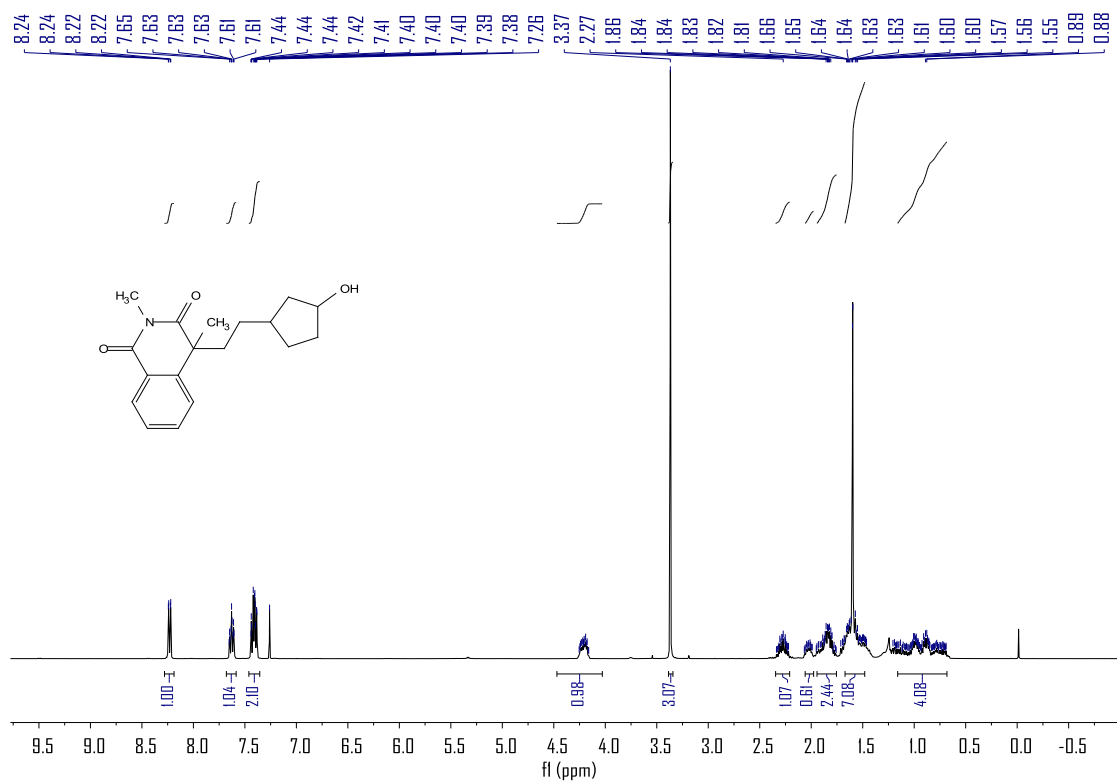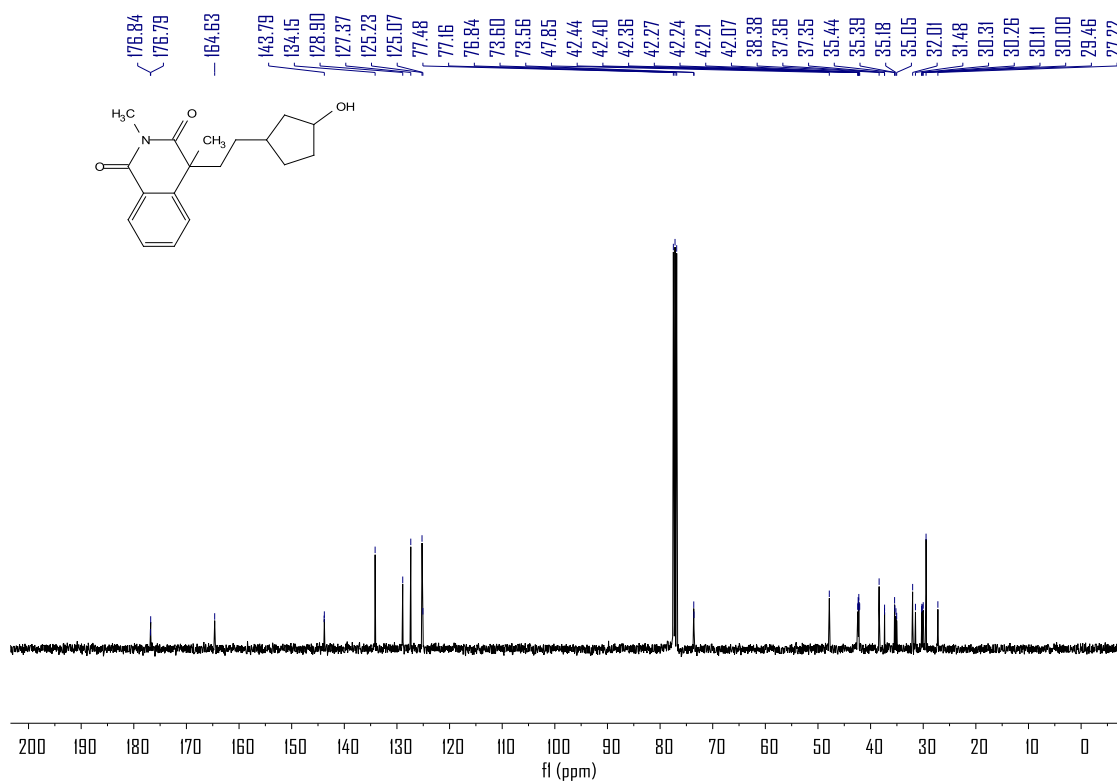

## Supporting Information

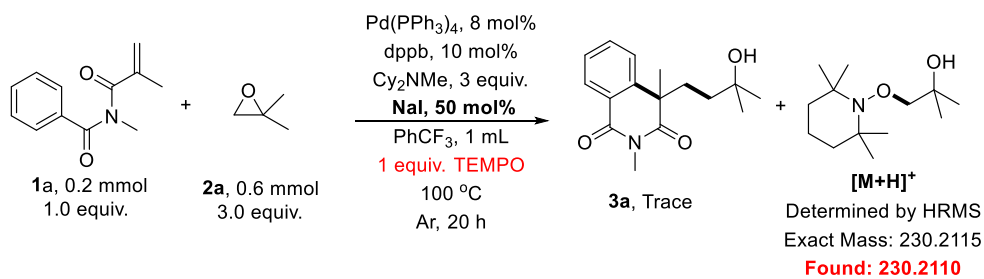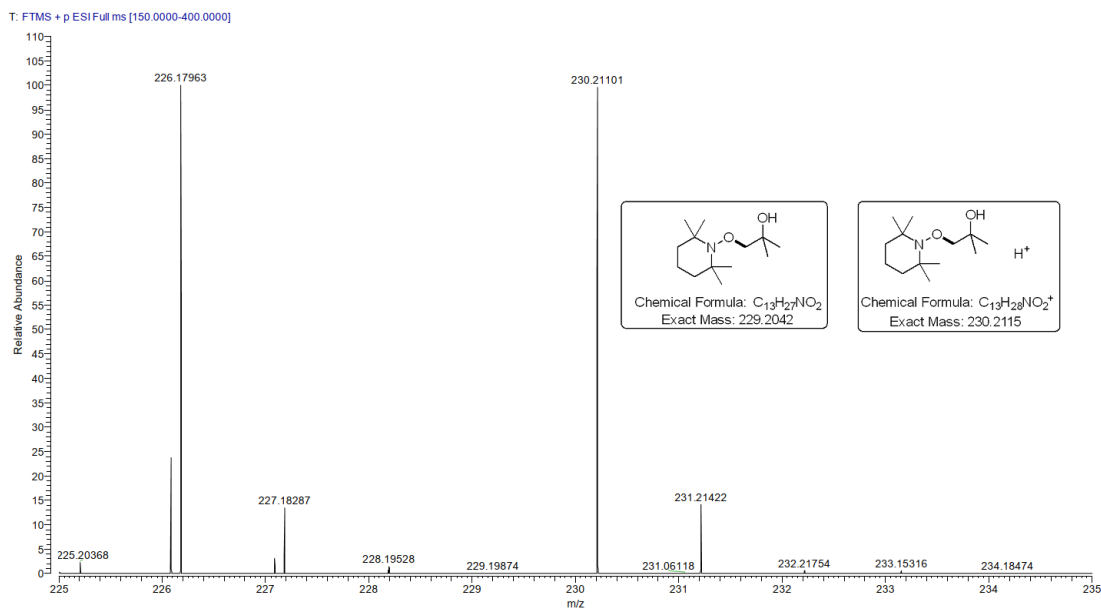

Supplement: d3qo01243c1.pdf [file d3qo01243c1.pdf]
